# Supplementary material for: The community composition variation of Russulaceae associated with the Quercus mongolica forest during the growing season at Wudalianchi City, China
Source: PeerJ. 2020 Feb 12;8:e8527. doi: 10.7717/peerj.8527 (PMC7023826; doi:10.7717/peerj.8527)
Supplement: Supplemental Information 1 [file peerj-08-8527-s001.xlsx]

## Sheet: OTU_Taxonomy of all fungi
Table1 The OTU taxonomy of all fungi
NOTE	Root in Oct.	Root in Jun.	Root in Jul.	Root in Aug.	Root in Sep.	Siol in Oct.	Siol in Jun.	Siol in Jul.	Siol in Aug.	Siol in Sep.
#OTU ID	R10	R6	R7	R8	R9	S10	S6	S7	S8	S9
Otu1219	0	0	0	0	0	0	16	3	0	0	Fungi;Basidiomycota;Agaricomycetes;Agaricales;Strophariaceae;Hymenogaster;Hymenogaster_rehsteineri
Otu1218	1	0	0	0	1	0	4	0	5	0	Fungi
Otu1217	3	0	0	0	0	2	0	0	0	9	Fungi;Ascomycota;Leotiomycetes;Helotiales;Helotiaceae;Articulospora;Articulospora_sp
Otu1216	1	8	0	0	1	0	0	0	0	0	Fungi
Otu1215	0	5	1	2	3	1	0	0	0	0	Fungi;Ascomycota
Otu1214	0	1	4	0	0	0	0	0	0	0	Fungi;Ascomycota;Incertae_sedis;Incertae_sedis;Incertae_sedis;Chalara;Chalara_sp
Otu1213	0	4	0	0	0	0	0	0	0	0	Fungi;Ascomycota
Otu1212	0	0	0	0	0	0	0	4	0	0	Fungi;Ascomycota;Dothideomycetes;Pleosporales;Tubeufiaceae;Helicoma;Helicoma_sp
Otu1211	0	0	0	0	0	0	4	0	0	0	Fungi;Ascomycota
Otu1210	0	1	4	0	1	0	0	0	0	1	Fungi;Basidiomycota
Otu1329	0	0	0	0	0	4	0	0	0	0	Fungi;Ascomycota;Dothideomycetes;Pleosporales;Leptosphaeriaceae;Leptosphaeria;Leptosphaeria_sydowii
Otu1328	3	0	0	0	0	1	0	0	0	0	Fungi;Ascomycota;Sordariomycetes;Hypocreales;Nectriaceae;Fusarium;Fusarium_sp_OTU_011
Otu1323	0	0	0	0	0	0	0	4	0	0	Fungi;Basidiomycota
Otu1322	0	0	1	0	0	1	0	0	0	4	Fungi;Basidiomycota;Agaricomycetes;Agaricales;Cortinariaceae;Protoglossum;Protoglossum_niveum
Otu1321	0	1	3	0	0	0	0	0	0	0	Fungi;Ascomycota;Sordariomycetes;Incertae_sedis;Apiosporaceae;Arthrinium;Arthrinium_saccharicola
Otu1320	0	0	3	0	1	3	0	0	0	0	Fungi
Otu1327	0	0	0	0	3	0	0	0	0	0	Fungi;Ascomycota;Dothideomycetes;Pleosporales;Sporormiaceae;Preussia;Preussia_sp
Otu1326	2	0	3	0	3	0	0	0	0	0	Fungi;Ascomycota;Dothideomycetes;Capnodiales;Teratosphaeriaceae
Otu1325	0	0	4	0	0	0	0	0	0	0	Fungi;Ascomycota;Sordariomycetes;Hypocreales
Otu1324	0	2	0	3	0	0	0	0	0	0	Fungi;Basidiomycota;Agaricomycetes;Sebacinales;Sebacinales_Group_B;Piriformospora;Piriformospora_indica
Otu318	1	31	5	4	1	3	3	2	0	0	Fungi;Ascomycota;Incertae_sedis;Incertae_sedis;Incertae_sedis;Thelonectria;Thelonectria_veuillotiana
Otu319	0	34	14	7	2	0	0	0	0	0	Fungi;Ascomycota;Leotiomycetes;Helotiales;Incertae_sedis;Cystodendron;Cystodendron_sp_EXP0561F
Otu310	9	32	13	30	3	10	37	44	4	12	Fungi;Zygomycota;Incertae_sedis;Mortierellales;Mortierellaceae;Mortierella;Mortierella_sp_VN2_2_5
Otu311	0	27	11	48	14	0	0	1	0	0	Fungi;Ascomycota;Eurotiomycetes;Chaetothyriales;Herpotrichiellaceae;Capronia
Otu312	1	0	0	0	0	5	0	1	41	0	Fungi;Basidiomycota;Agaricomycetes;Russulales;Russulaceae;Russula
Otu313	0	4	0	0	0	2	42	7	0	0	Fungi;Chytridiomycota;Chytridiomycetes;Spizellomycetales;Spizellomycetaceae;Powellomyces
Otu314	1	56	43	8	8	0	2	9	3	14	Fungi;Ascomycota;Dothideomycetes;Pleosporales;Montagnulaceae;Paraconiothyrium
Otu315	22	37	33	37	12	25	0	17	0	0	Fungi;Ascomycota;Incertae_sedis;Incertae_sedis;Incertae_sedis
Otu316	3	0	40	0	4	0	0	0	0	5	Fungi;Ascomycota;Sordariomycetes;Xylariales;Xylariaceae;Nodulisporium;Nodulisporium_sp
Otu317	0	0	0	0	34	0	0	0	0	5	Fungi;Basidiomycota
Otu338	15	6	13	12	9	0	2	5	21	47	Fungi;Basidiomycota;Agaricomycetes;Sebacinales;Sebacinaceae;Sebacina;Sebacina_sp
Otu798	0	0	0	0	0	0	0	0	0	11	Fungi;Basidiomycota;Agaricomycetes;Agaricales;Entolomataceae;Entoloma
Otu799	0	3	0	0	0	0	0	15	0	5	Fungi;Basidiomycota;Agaricomycetes;Russulales;Russulaceae;Lactarius
Otu794	0	0	0	3	3	0	0	9	0	0	Fungi;Zygomycota;Incertae_sedis;Mortierellales;Mortierellaceae;Mortierella;Mortierella_zychae
Otu795	1	0	0	7	0	0	0	0	0	0	Fungi;Basidiomycota;Tremellomycetes;Tremellales;Incertae_sedis;Cryptococcus;Cryptococcus_aerius
Otu796	5	0	0	0	0	7	0	0	0	0	Fungi;Ascomycota;Dothideomycetes;Capnodiales;Mycosphaerellaceae;Pseudocercosporella;Pseudocercosporella_sp_RH21
Otu797	0	0	8	0	0	0	0	0	0	2	Fungi
Otu790	0	0	0	0	0	0	7	0	0	0	Fungi;Ascomycota
Otu791	2	11	22	11	6	1	4	0	0	1	Fungi;Ascomycota;Eurotiomycetes;Chaetothyriales;Herpotrichiellaceae;Capronia;Capronia_sp
Otu792	0	4	0	0	10	3	0	0	0	7	Fungi;Ascomycota;Sordariomycetes;Xylariales
Otu793	0	0	2	0	0	0	0	3	9	3	Fungi;Basidiomycota;Agaricomycetes;Russulales;Russulaceae;Russula
Otu1037	0	0	0	0	6	0	0	0	0	0	Fungi
Otu1036	0	0	0	0	0	10	0	0	0	0	Fungi;Ascomycota;Dothideomycetes;Pleosporales;Pleosporaceae;Stemphylium
Otu1035	0	2	0	0	0	0	0	0	5	0	Fungi
Otu1034	1	1	2	0	0	3	2	6	0	1	Fungi;Basidiomycota
Otu1033	0	5	3	1	0	9	0	6	27	0	Fungi;Basidiomycota
Otu1032	0	0	0	0	1	2	0	6	0	0	Fungi
Otu558	0	12	8	0	0	0	0	0	0	0	Fungi;Ascomycota;Eurotiomycetes;Chaetothyriales;Herpotrichiellaceae;Exophiala
Otu559	0	2	19	0	0	0	0	1	3	0	Fungi
Otu556	0	0	0	0	0	7	0	13	0	0	Fungi
Otu557	0	0	2	1	6	3	0	0	0	18	Fungi;Basidiomycota;Agaricomycetes;Agaricales;Inocybaceae;Inocybe;Inocybe_nemorosa
Otu554	5	1	0	0	0	5	37	0	6	0	Fungi;Basidiomycota;Agaricomycetes;Thelephorales;Thelephoraceae;Thelephora;Thelephora_sp
Otu555	0	0	0	22	3	6	0	0	0	0	Fungi;Basidiomycota;Agaricomycetes;Agaricales;Clavariaceae;Unclassified;Clavariaceae_sp
Otu552	4	9	9	1	0	20	3	2	15	8	Fungi
Otu553	0	0	13	1	1	0	0	7	5	0	Fungi;Basidiomycota;Agaricomycetes;Agaricales;Clavariaceae;Clavaria;Clavaria_californica
Otu550	0	0	0	0	0	0	0	0	17	0	Fungi
Otu551	2	0	12	0	1	15	0	0	0	0	Fungi;Ascomycota;Leotiomycetes;Helotiales;Incertae_sedis;Xylogone;Xylogone_sp
Otu776	0	0	0	0	0	0	0	9	10	0	Fungi
Otu777	0	11	5	0	0	6	0	0	0	0	Fungi;Ascomycota;Dothideomycetes;Venturiales;Venturiaceae;Unclassified;Venturiaceae_sp
Otu774	0	0	0	0	7	2	0	0	0	0	Fungi;Ascomycota;Leotiomycetes;Helotiales;Rutstroemiaceae;Lambertella;Lambertella_advenula
Otu775	0	0	0	0	0	0	7	0	0	0	Fungi;Basidiomycota
Otu772	0	0	0	0	0	13	0	0	0	0	Fungi;Basidiomycota;Agaricomycetes;Agaricales;Agaricaceae;Lepiota;Lepiota_magnispora
Otu773	0	0	16	0	0	0	0	0	0	0	Fungi;Ascomycota;Dothideomycetes;Incertae_sedis;Incertae_sedis;Leptospora;Leptospora_rubella
Otu954	0	2	6	0	6	4	0	0	0	3	Fungi;Basidiomycota;Microbotryomycetes
Otu955	0	0	0	0	0	0	0	0	5	0	Fungi;Basidiomycota;Agaricomycetes;Thelephorales;Thelephoraceae;Unclassified;Thelephoraceae_sp
Otu958	0	0	6	0	0	0	0	0	0	0	Fungi;Basidiomycota;Agaricomycetes;Thelephorales;Thelephoraceae;Tomentella;Tomentella_sp_OTU215
Otu959	1	0	2	0	6	0	2	0	0	0	Fungi;Ascomycota;Leotiomycetes;Helotiales;Helotiaceae;Articulospora;Articulospora_sp
Otu778	0	0	0	0	7	0	0	0	0	0	Fungi;Basidiomycota;Agaricomycetes;Thelephorales;Thelephoraceae
Otu779	0	0	2	0	0	0	0	2	0	7	Fungi;Basidiomycota
Otu1848	0	4	1	0	0	0	0	0	0	0	Fungi;Basidiomycota;Agaricomycetes;Agaricales;Psathyrellaceae;Coprinellus;Coprinellus_sp_CBM_FB_33076
Otu1849	10	41	1	0	1	4	0	17	7	29	Fungi;Zygomycota;Incertae_sedis;Mortierellales;Mortierellaceae;Mortierella
Otu174	97	0	0	0	131	7	2	0	3	9	Fungi;Basidiomycota;Agaricomycetes;Thelephorales;Thelephoraceae;Tomentella
Otu175	0	95	40	4	1	6	70	28	5	0	Fungi;Ascomycota;Leotiomycetes;Helotiales;Incertae_sedis;Hyalodendriella;Hyalodendriella_sp
Otu176	2458	2002	4162	1837	2881	237	572	1185	1015	2122	Fungi;Zygomycota;Incertae_sedis;Mortierellales;Mortierellaceae;Mortierella;Mortierella_clonocystis
Otu177	14	156	94	15	71	6	0	0	0	0	Fungi;Ascomycota;Leotiomycetes
Otu170	0	74	3	2	1	1	0	0	0	105	Fungi;Ascomycota;Sordariomycetes
Otu171	5	38	24	21	15	9	2	280	0	4	Fungi;Basidiomycota;Agaricomycetes;Agaricales;Mycenaceae;Mycena;Mycena_speirea
Otu172	234	0	4	3	206	9	5	6	1	14	Fungi;Basidiomycota;Agaricomycetes;Thelephorales;Thelephoraceae;Tomentella;Tomentella_sp
Otu173	0	0	0	0	0	2	87	9	5	1	Fungi;Zygomycota;Incertae_sedis;Mortierellales;Mortierellaceae;Mortierella
Otu178	0	0	0	20	94	0	0	0	0	0	Fungi;Ascomycota;Incertae_sedis;Incertae_sedis;Incertae_sedis;Chalara;Chalara_sp
Otu179	0	2	79	21	12	5	26	7	0	88	Fungi;Ascomycota;Sordariomycetes;Hypocreales;Nectriaceae;Cylindrium;Cylindrium_sp
Otu1693	3	0	0	0	0	0	0	0	0	0	Fungi;Ascomycota;Leotiomycetes;Helotiales
Otu1692	0	0	0	0	2	0	0	0	0	0	Fungi;Basidiomycota;Agaricomycetes;Agaricales
Otu1691	0	0	0	0	0	0	0	0	2	0	Fungi;Ascomycota
Otu1690	0	0	2	0	0	0	0	0	0	0	Fungi;Ascomycota;Eurotiomycetes;Chaetothyriales;Herpotrichiellaceae;Cladophialophora;Cladophialophora_sp_LS_2013
Otu1697	1	2	2	0	0	1	3	1	4	0	Fungi;Ascomycota;Pezizomycetes;Pezizales;Pyronemataceae;Humaria;Humaria_hemisphaerica
Otu1696	0	3	0	0	0	0	0	0	0	0	Fungi;Basidiomycota
Otu1695	0	3	5	0	2	2	0	1	0	0	Fungi;Ascomycota
Otu1694	0	0	0	0	0	0	2	0	0	0	Fungi
Otu1846	0	0	0	0	3	0	0	0	0	0	Fungi;Ascomycota;Leotiomycetes;Helotiales
Otu1699	0	2	0	0	0	0	0	0	0	0	Fungi;Basidiomycota;Agaricomycetes;Agaricales;Psathyrellaceae;Coprinopsis;Coprinopsis_xenobia
Otu1698	0	0	0	0	0	0	3	0	0	0	Fungi;Basidiomycota;Tremellomycetes;Cystofilobasidiales;Cystofilobasidiaceae;Unclassified;Cystofilobasidiaceae_sp
Otu1847	0	0	0	0	0	2	0	0	0	0	Fungi
Otu1513	0	0	0	2	0	0	0	0	0	0	Fungi;Ascomycota;Sordariomycetes;Hypocreales;Nectriaceae;Haematonectria;Haematonectria_haematococca
Otu1515	0	0	0	2	0	0	0	0	0	0	Fungi;Ascomycota;Sordariomycetes;Xylariales;Xylariaceae;Xylaria
Otu61	2	6	321	61	31	9	0	19	0	3	Fungi;Ascomycota;Sordariomycetes;Xylariales;Unclassified;Unclassified;Xylariales_sp
Otu60	72	386	316	52	435	6	0	17	11	0	Fungi;Ascomycota;Leotiomycetes;Helotiales;Hyaloscyphaceae;Lachnum;Lachnum_virgineum
Otu63	5	3	0	0	0	58	15	10	339	19	Fungi;Ascomycota;Pezizomycetes;Pezizales;Incertae_sedis;Pulvinula;Pulvinula_sp
Otu62	366	68	18	38	154	132	60	75	181	9	Fungi;Basidiomycota;Agaricomycetes;Russulales;Russulaceae;Russula;Russula_persicina
Otu65	0	20	0	0	0	0	316	0	0	0	Fungi;Basidiomycota;Agaricomycetes;Agaricales;Cortinariaceae;Cortinarius
Otu64	24	83	387	170	75	65	12	118	26	97	Fungi;Ascomycota;Dothideomycetes;Pleosporales;Incertae_sedis;Phoma
Otu67	336	10	1	64	4	18	0	27	0	328	Fungi;Basidiomycota;Agaricomycetes;Thelephorales;Thelephoraceae;Tomentella
Otu66	36	374	278	170	61	24	12	14	7	11	Fungi;Ascomycota;Sordariomycetes;Hypocreales;Hypocreaceae;Trichoderma;Trichoderma_sp_TR057
Otu69	6	106	287	6	46	14	11	46	26	13	Fungi;Ascomycota;Sordariomycetes;Hypocreales;Nectriaceae;Nectria;Nectria_ramulariae
Otu68	0	0	11	9	0	31	346	358	2	7	Fungi;Basidiomycota;Agaricomycetes;Russulales;Russulaceae;Russula;Russula_foetens
Otu1040	0	5	0	0	0	0	0	0	0	1	Fungi;Basidiomycota
Otu1041	1	7	0	0	0	0	0	0	0	0	Fungi;Basidiomycota
Otu197	24	67	192	76	13	26	14	18	4	13	Fungi;Ascomycota;Sordariomycetes;Hypocreales;Hypocreaceae;Trichoderma;Trichoderma_tomentosum
Otu1208	0	0	0	0	0	0	1	0	4	0	Fungi;Basidiomycota
Otu1209	0	0	1	0	0	0	0	4	0	0	Fungi;Ascomycota;Eurotiomycetes;Eurotiales;Trichocomaceae;Paecilomyces;Paecilomyces_lilacinus
Otu1204	0	0	0	0	0	5	0	0	0	0	Fungi;Basidiomycota
Otu1205	0	7	0	3	4	0	0	0	0	0	Fungi;Basidiomycota
Otu1206	0	0	0	0	0	5	0	0	0	0	Fungi;Basidiomycota
Otu1207	0	0	0	0	0	4	3	0	0	0	Fungi;Basidiomycota
Otu1200	0	0	0	0	0	0	4	0	0	0	Fungi;Ascomycota;Orbiliomycetes;Orbiliales;Orbiliaceae;Dactylella;Dactylella_rhopalota
Otu1201	0	0	0	0	0	0	0	5	0	0	Fungi;Basidiomycota
Otu1202	0	1	1	0	0	2	0	0	5	0	Fungi;Basidiomycota
Otu1203	0	6	0	2	0	0	0	0	0	0	Fungi;Ascomycota;Dothideomycetes;Capnodiales;Davidiellaceae;Cladosporium;Cladosporium_sphaerospermum
Otu1048	0	0	0	0	0	0	0	6	0	1	Fungi
Otu1049	0	0	5	0	0	0	0	0	0	0	Fungi;Basidiomycota
Otu1338	2	3	2	0	0	0	0	5	5	1	Fungi;Ascomycota;Pezizomycetes;Pezizales;Pyronemataceae;Otidea;Otidea_bufonia
Otu1339	5	4	0	0	0	0	0	0	0	0	Fungi;Ascomycota;Orbiliomycetes;Orbiliales;Orbiliaceae;Dactylellina;Dactylellina_ellipsospora
Otu1330	0	0	0	0	3	0	0	0	0	0	Fungi;Ascomycota
Otu1331	0	0	0	0	0	0	3	0	0	0	Fungi;Ascomycota;Leotiomycetes;Helotiales;Vibrisseaceae
Otu1332	0	0	2	2	0	8	0	2	3	0	Fungi;Basidiomycota;Agaricomycetes;Phallales;Phallaceae;Phallus;Phallus_impudicus
Otu1333	0	0	0	0	0	3	0	1	0	0	Fungi;Ascomycota;Dothideomycetes;Venturiales;Venturiaceae;Unclassified;Venturiaceae_sp
Otu1334	0	0	0	0	0	0	3	0	0	0	Fungi;Ascomycota;Sordariomycetes;Xylariales;Diatrypaceae;Diatrypella;Diatrypella_favacea
Otu1335	0	0	0	2	2	0	0	0	0	6	Fungi;Ascomycota;Eurotiomycetes;Chaetothyriales;Herpotrichiellaceae;Exophiala;Exophiala_sp
Otu1336	0	0	0	0	3	1	2	1	0	0	Fungi;Basidiomycota;Microbotryomycetes;Sporidiobolales;Incertae_sedis;Sporobolomyces;Sporobolomyces_tsugae
Otu1337	1	3	1	0	5	0	0	0	0	0	Fungi;Basidiomycota;Tremellomycetes;Filobasidiales;Filobasidiaceae;Cryptococcus;Cryptococcus_arrabidensis
Otu789	0	0	0	0	0	0	0	8	0	0	Fungi;Ascomycota;Sordariomycetes;Sordariales;Lasiosphaeriaceae;Lasiosphaeris;Lasiosphaeris_sp_1_ANM_2011
Otu788	0	0	0	0	0	0	0	0	8	12	Fungi;Basidiomycota;Agaricomycetes;Agaricales;Amanitaceae;Amanita;Amanita_pantherina
Otu783	0	8	0	0	0	0	0	0	0	1	Fungi;Ascomycota;Dothideomycetes;Pleosporales;Leptosphaeriaceae;Coniothyrium;Coniothyrium_cereale
Otu782	0	0	0	0	0	0	0	0	12	0	Fungi;Basidiomycota
Otu781	0	2	0	0	0	0	10	0	0	0	Fungi;Ascomycota;Dothideomycetes;Pleosporales;Leptosphaeriaceae;Leptosphaeria
Otu780	0	7	0	0	2	0	0	0	0	0	Fungi;Ascomycota;Sordariomycetes
Otu787	0	8	0	0	0	0	0	0	0	0	Fungi;Ascomycota;Dothideomycetes;Pleosporales;Incertae_sedis;Setomelanomma;Setomelanomma_holmii
Otu786	0	8	0	1	4	0	0	0	0	0	Fungi;Basidiomycota;Agaricomycetes;Auriculariales;Incertae_sedis;Auricularia;Auricularia_sp
Otu785	0	0	0	8	0	0	0	0	0	0	Fungi;Basidiomycota;Microbotryomycetes;Sporidiobolales;Sporidiobolaceae;Sporidiobolus;Sporidiobolus_aff_pararoseus_1_MCA_3691
Otu784	0	0	0	0	0	0	0	15	0	0	Fungi;Basidiomycota;Agaricomycetes;Agaricales;Entolomataceae;Entoloma;Entoloma_sp
Otu1024	0	0	0	0	0	0	0	0	0	8	Fungi;Basidiomycota
Otu1025	0	3	1	7	0	5	0	3	0	0	Fungi;Basidiomycota;Agaricomycetes;Agaricales;Tricholomataceae;Clitocybe;Clitocybe_anisata
Otu1026	4	0	0	0	2	2	0	0	0	13	Fungi;Basidiomycota;Agaricomycetes;Agaricales;Cortinariaceae;Cortinarius
Otu1027	0	0	0	0	0	5	0	0	0	0	Fungi;Basidiomycota;Agaricomycetes;Agaricales;Inocybaceae;Inocybe
Otu1020	0	0	0	0	0	0	7	0	0	0	Fungi;Basidiomycota;Agaricomycetes;Agaricales;Inocybaceae;Inocybe;Inocybe_sp_PRL7420
Otu1021	0	0	0	4	0	0	0	5	0	0	Fungi;Ascomycota;Sordariomycetes;Sordariales
Otu1022	0	2	7	0	0	0	0	0	0	0	Fungi;Basidiomycota;Agaricomycetes;Agaricales;Strophariaceae;Psilocybe;Psilocybe_cf_subviscida/crobula_X_45
Otu1023	0	5	0	0	0	0	0	0	0	0	Fungi;Ascomycota;Dothideomycetes;Pleosporales
Otu545	0	14	0	0	0	0	0	0	0	0	Fungi;Ascomycota;Eurotiomycetes;Chaetothyriales;Herpotrichiellaceae;Exophiala
Otu544	0	0	0	14	0	0	0	0	0	0	Fungi;Ascomycota;Dothideomycetes;Pleosporales;Phaeosphaeriaceae;Stagonospora
Otu547	2	4	0	5	9	0	0	8	0	13	Fungi;Basidiomycota;Microbotryomycetes;Sporidiobolales;Incertae_sedis
Otu546	0	0	17	0	0	0	0	0	0	0	Fungi;Basidiomycota
Otu1028	0	2	2	0	0	6	6	2	0	2	Fungi;Basidiomycota
Otu1029	0	0	2	6	0	0	0	0	0	0	Fungi;Ascomycota;Sordariomycetes;Xylariales;Xylariaceae;Daldinia
Otu543	2	6	5	13	1	11	0	5	0	0	Fungi;Basidiomycota
Otu542	0	13	0	14	1	0	0	0	0	0	Fungi;Ascomycota;Eurotiomycetes;Chaetothyriales;Herpotrichiellaceae;Cladophialophora;Cladophialophora_sp_olrim407
Otu765	0	0	0	3	0	4	0	13	0	8	Fungi;Basidiomycota;Agaricomycetes
Otu764	0	0	0	0	0	0	0	10	0	0	Fungi;Basidiomycota
Otu943	2	7	3	5	4	1	4	12	0	4	Fungi;Ascomycota;Dothideomycetes;Pleosporales;Cucurbitariaceae;Pyrenochaetopsis;Pyrenochaetopsis_sp
Otu766	3	8	4	9	0	0	0	12	0	0	Fungi;Basidiomycota;Microbotryomycetes;Sporidiobolales;Incertae_sedis
Otu945	0	0	0	0	0	0	6	0	2	0	Fungi;Basidiomycota;Agaricomycetes;Thelephorales;Thelephoraceae;Tomentella;Tomentella_sp_OTU208
Otu760	0	3	0	0	3	3	0	14	9	0	Fungi;Basidiomycota;Agaricomycetes;Agaricales;Clavariaceae;Ramariopsis
Otu947	0	5	0	2	0	0	0	0	0	0	Fungi
Otu946	0	0	8	0	0	0	0	0	0	0	Fungi;Ascomycota;Leotiomycetes;Helotiales;Incertae_sedis
Otu949	0	0	3	0	0	0	0	1	0	7	Fungi;Ascomycota;Eurotiomycetes;Eurotiales;Trichocomaceae;Aspergillus
Otu948	0	0	5	0	0	0	0	0	0	0	Fungi;Ascomycota;Sordariomycetes;Hypocreales;Nectriaceae;Microcera;Microcera_rubra
Otu769	0	0	0	0	0	7	10	1	0	0	Fungi;Basidiomycota;Agaricomycetes;Russulales;Russulaceae;Russula;Russula_pelargonia
Otu768	1	0	2	3	0	6	9	0	0	0	Fungi
Otu307	51	0	7	19	60	11	0	0	0	0	Fungi;Basidiomycota;Agaricomycetes;Thelephorales;Thelephoraceae;Odontia;Odontia_sp
Otu306	0	15	43	1	3	1	0	5	5	1	Fungi;Ascomycota;Dothideomycetes;Venturiales;Venturiaceae;Unclassified;Venturiaceae_sp
Otu305	4	0	3	0	0	21	54	12	43	10	Fungi
Otu304	1	3	0	0	0	2	0	0	7	73	Fungi;Basidiomycota;Agaricomycetes;Russulales;Russulaceae;Russula;Russula_exalbicans
Otu303	0	0	14	39	0	0	0	0	2	0	Fungi;Ascomycota;Dothideomycetes;Pleosporales;Leptosphaeriaceae
Otu302	15	82	51	17	19	1	0	2	0	5	Fungi;Ascomycota;Eurotiomycetes;Chaetothyriales;Herpotrichiellaceae
Otu301	0	1	2	0	0	0	0	57	48	0	Fungi;Basidiomycota;Agaricomycetes;Sebacinales;Sebacinaceae;Sebacina;Sebacina_flagelliformis
Otu300	18	0	3	0	4	42	0	11	0	0	Fungi;Basidiomycota
Otu309	25	14	39	0	31	0	2	7	0	8	Fungi;Basidiomycota;Agaricomycetes;Thelephorales;Thelephoraceae;Tomentella;Tomentella_lapida
Otu308	41	0	0	0	1	6	5	0	1	4	Fungi;Basidiomycota;Agaricomycetes;Cantharellales;Clavulinaceae;Unclassified;Clavulinaceae_sp
Otu163	0	0	123	5	2	0	0	2	0	0	Fungi;Ascomycota;Sordariomycetes;Xylariales
Otu162	6	101	131	25	31	11	3	8	37	5	Fungi;Ascomycota;Dothideomycetes;Incertae_sedis;Pseudeurotiaceae;Pseudogymnoascus;Pseudogymnoascus_roseus
Otu161	131	12	0	0	12	31	9	163	2	7	Fungi;Basidiomycota;Agaricomycetes;Agaricales
Otu160	19	37	37	121	10	5	0	2	0	107	Fungi;Ascomycota;Dothideomycetes;Pleosporales
Otu167	0	1	4	5	5	30	97	25	6	51	Fungi;Basidiomycota;Agaricomycetes;Sebacinales;Sebacinaceae;Sebacina;Sebacina_sp
Otu166	6	8	0	1	5	278	11	9	17	12	Fungi;Ascomycota;Dothideomycetes;Capnodiales;Mycosphaerellaceae;Cercospora;Cercospora_apii
Otu165	0	26	97	0	12	0	0	0	0	0	Fungi;Basidiomycota
Otu164	18	20	6	1	95	255	101	38	207	14	Fungi;Basidiomycota;Agaricomycetes;Atheliales;Atheliaceae;Piloderma;Piloderma_lanatum
Otu169	101	55	46	2	17	33	18	20	23	2	Fungi;Ascomycota;Leotiomycetes;Leotiales;Leotiaceae;Leotia;Leotia_lubrica
Otu168	0	0	0	0	0	9	1	8	103	0	Fungi;Basidiomycota
Otu1680	0	0	0	0	0	0	0	0	2	0	Fungi
Otu1681	0	0	0	0	3	0	0	0	0	0	Fungi;Basidiomycota;Agaricomycetes;Agaricales;Clavariaceae
Otu1682	0	0	0	2	0	0	0	0	0	0	Fungi;Basidiomycota;Agaricomycetes;Agaricales
Otu1683	0	0	0	0	0	0	0	0	0	2	Fungi;Ascomycota;Dothideomycetes;Capnodiales
Otu1684	0	0	0	0	0	0	0	0	2	0	Fungi;Ascomycota;Dothideomycetes;Botryosphaeriales;Unclassified;Unclassified;Botryosphaeriales_sp
Otu1685	2	0	1	0	0	0	0	0	0	0	Fungi;Basidiomycota;Agaricomycetes;Agaricales;Pluteaceae;Volvariella;Volvariella_dunensis
Otu1686	1	0	0	0	0	2	0	0	0	0	Fungi;Ascomycota;Pezizomycetes;Pezizales;Pezizaceae;Hydnobolites;Hydnobolites_sp_13_RH_2012
Otu1687	0	0	0	0	0	0	4	1	1	0	Fungi;Basidiomycota;Agaricomycetes;Agaricales;Strophariaceae;Hymenogaster;Hymenogaster_sp
Otu1688	0	0	4	0	0	0	0	0	0	0	Fungi;Ascomycota;Leotiomycetes;Helotiales
Otu1689	3	0	0	0	0	0	0	0	0	0	Fungi;Ascomycota;Eurotiomycetes;Eurotiales;Trichocomaceae;Paecilomyces;Paecilomyces_marquandii
Otu1506	0	0	0	0	0	1	2	0	1	2	Fungi;Ascomycota
Otu1031	0	0	0	0	1	0	0	5	0	0	Fungi;Basidiomycota
Otu1030	0	0	0	0	0	0	0	0	7	0	Fungi;Basidiomycota;Agaricomycetes;Agaricales;Inocybaceae;Inocybe
Otu72	374	22	9	30	2	51	54	33	156	3	Fungi;Basidiomycota;Agaricomycetes;Agaricales;Cortinariaceae;Cortinarius;Cortinarius_cedriolens
Otu73	326	5	8	1	39	3	27	4	0	0	Fungi;Basidiomycota;Agaricomycetes;Thelephorales;Thelephoraceae;Tomentella;Tomentella_lateritia
Otu70	0	8	20	5	0	5	0	296	197	4	Fungi;Basidiomycota;Agaricomycetes;Sebacinales;Sebacinaceae;Sebacina;Sebacina_flagelliformis
Otu71	330	25	83	26	74	29	93	17	25	56	Fungi;Basidiomycota;Agaricomycetes;Thelephorales;Thelephoraceae
Otu76	174	418	111	225	60	183	482	206	267	73	Fungi;Basidiomycota;Agaricomycetes;Agaricales;Cortinariaceae;Cortinarius;Cortinarius_bivelus
Otu77	0	0	0	0	0	3	597	0	0	0	Fungi;Basidiomycota;Agaricomycetes;Agaricales;Hygrophoraceae;Hygrophorus
Otu74	3	248	1	27	76	0	0	0	118	12	Fungi;Zygomycota;Incertae_sedis;Mortierellales;Mortierellaceae;Mortierella;Mortierella_hyalina
Otu75	71	53	64	105	326	25	49	33	21	69	Fungi;Basidiomycota;Agaricomycetes;Thelephorales;Thelephoraceae;Pseudotomentella;Pseudotomentella_sp
Otu1525	0	0	3	0	0	0	1	2	0	0	Fungi
Otu1524	0	0	2	0	0	0	0	0	0	0	Fungi
Otu78	9	65	17	23	77	65	155	322	37	133	Fungi;Basidiomycota;Agaricomycetes;Sebacinales;Sebacinaceae;Sebacina;Sebacina_sp
Otu79	383	0	6	0	11	12	21	4	4	11	Fungi;Basidiomycota;Agaricomycetes;Thelephorales;Thelephoraceae;Unclassified;Thelephoraceae_sp
Otu1521	0	2	0	0	0	0	0	0	0	0	Fungi;Ascomycota;Pezizomycetes;Pezizales;Pezizaceae;Peziza;Peziza_sp
Otu1520	0	29	16	9	9	8	1	12	0	16	Fungi;Basidiomycota;Agaricomycetes;Agaricales;Lycoperdaceae;Unclassified;Lycoperdaceae_sp
Otu1523	0	0	3	0	0	0	0	0	0	0	Fungi;Basidiomycota;Agaricomycetes;Agaricales;Clavariaceae
Otu1522	1	1	2	0	0	1	2	0	0	2	Fungi;Ascomycota;Leotiomycetes;Helotiales;Dermateaceae;Unclassified;uncultured_Dermateaceae
Otu1561	0	2	0	0	0	0	0	0	0	0	Fungi;Ascomycota
Otu1039	1	4	9	5	4	0	2	0	0	0	Fungi;Ascomycota;Sordariomycetes;Hypocreales;Clavicipitaceae;Unclassified;Clavicipitaceae_sp
Otu1560	0	0	0	0	0	0	0	0	3	0	Fungi;Basidiomycota
Otu1038	0	0	0	0	0	0	5	0	0	0	Fungi;Basidiomycota
Otu1563	0	0	2	0	0	0	0	0	0	0	Fungi;Ascomycota;Dothideomycetes;Venturiales;Venturiaceae;Unclassified;Venturiaceae_sp
Otu952	0	0	1	5	0	1	4	0	0	0	Fungi
Otu1562	0	0	0	0	0	3	0	0	0	0	Fungi;Basidiomycota
Otu953	1	11	6	13	0	5	5	5	5	0	Fungi;Basidiomycota;Agaricomycetes
Otu1565	0	0	0	2	0	0	0	0	0	0	Fungi;Basidiomycota;Microbotryomycetes;Sporidiobolales;Incertae_sedis;Rhodotorula;Rhodotorula_mucilaginosa
Otu950	0	0	5	0	0	0	0	0	0	0	Fungi;Basidiomycota;Agaricomycetes;Agaricales;Clavariaceae;Unclassified;Clavariaceae_sp
Otu1564	0	4	0	0	0	0	0	0	0	0	Fungi;Basidiomycota;Agaricomycetes;Agaricales;Clavariaceae;Clavaria;Clavaria_acuta
Otu951	0	0	0	0	0	0	0	6	0	0	Fungi;Basidiomycota;Microbotryomycetes;Sporidiobolales;Incertae_sedis;Sporobolomyces;Sporobolomyces_falcatus
Otu1567	0	0	0	2	0	0	1	0	0	0	Fungi;Chytridiomycota;Chytridiomycetes;Rhizophydiales
Otu956	0	0	0	0	0	8	1	0	2	0	Fungi;Basidiomycota
Otu1566	0	3	0	0	0	0	0	0	0	0	Fungi;Ascomycota;Incertae_sedis;Incertae_sedis;Incertae_sedis;Chalara;Chalara_microchona
Otu957	0	0	0	0	0	5	0	0	0	0	Fungi;Basidiomycota;Agaricomycetes;Agaricales;Inocybaceae;Inocybe
Otu1239	0	3	0	0	2	4	2	0	0	7	Fungi;Ascomycota;Pezizomycetes;Pezizales;Pezizaceae;Hydnobolites
Otu1238	0	0	0	0	0	0	0	6	0	1	Fungi;Basidiomycota
Otu770	0	0	0	3	0	0	0	0	0	8	Fungi
Otu1231	0	0	4	0	0	0	0	0	0	0	Fungi;Ascomycota;Sordariomycetes;Hypocreales;Nectriaceae;Cylindrocarpon;Cylindrocarpon_ianthothele_var_ianthothele
Otu1230	0	0	0	0	0	0	0	0	5	0	Fungi
Otu1233	0	0	0	0	0	0	3	0	4	0	Fungi;Basidiomycota;Agaricomycetes;Thelephorales;Thelephoraceae;Tomentella
Otu771	0	5	1	13	10	0	31	8	38	1	Fungi;Basidiomycota;Agaricomycetes;Agaricales;Cortinariaceae;Cortinarius
Otu1235	0	0	0	0	0	0	0	4	0	0	Fungi;Basidiomycota
Otu1234	0	0	0	0	0	5	0	0	0	0	Fungi;Basidiomycota
Otu1237	0	0	3	0	0	0	0	0	0	0	Fungi
Otu1236	0	0	0	0	3	0	0	0	0	0	Fungi;Basidiomycota
Otu893	0	0	0	0	0	1	6	0	0	2	Fungi;Basidiomycota
Otu892	2	9	0	0	6	0	0	0	0	0	Fungi;Basidiomycota;Tremellomycetes;Tremellales;Incertae_sedis;Cryptococcus;Cryptococcus_victoriae
Otu891	0	0	0	0	0	0	7	0	0	0	Fungi
Otu890	0	0	8	0	0	0	0	0	0	1	Fungi;Basidiomycota;Agaricomycetes;Thelephorales;Thelephoraceae;Tomentella;Tomentella_pilosa
Otu897	1	10	11	0	0	0	12	21	4	0	Fungi;Basidiomycota;Agaricomycetes;Thelephorales;Thelephoraceae;Tomentella
Otu896	0	2	1	6	1	2	0	0	0	0	Fungi;Ascomycota;Sordariomycetes;Sordariales;Lasiosphaeriaceae
Otu671	0	5	12	0	0	0	3	1	4	0	Fungi
Otu894	0	9	0	0	0	0	0	0	0	0	Fungi;Ascomycota;Leotiomycetes;Helotiales;Sclerotiniaceae;Unclassified;Sclerotiniaceae_sp
Otu1305	0	0	0	0	4	0	0	0	0	0	Fungi
Otu1304	5	0	3	0	0	0	0	2	0	0	Fungi;Ascomycota;Eurotiomycetes;Eurotiales;Trichocomaceae;Emericella;Emericella_sp_d01
Otu1307	3	0	0	0	0	0	0	0	0	0	Fungi;Basidiomycota
Otu1306	0	0	0	0	1	0	0	0	9	3	Fungi
Otu1301	0	0	6	0	0	0	0	0	0	0	Fungi;Basidiomycota;Agaricomycetes;Thelephorales;Thelephoraceae;Tomentella;Tomentella_lateritia
Otu1300	0	0	3	0	0	0	0	0	0	0	Fungi;Basidiomycota;Agaricomycetes;Boletales;Coniophoraceae;Coniophora
Otu1303	0	0	0	0	0	0	0	0	0	3	Fungi;Basidiomycota;Agaricomycetes;Thelephorales;Thelephoraceae;Thelephora;Thelephora_sp
Otu1302	0	0	3	0	0	0	0	0	0	0	Fungi;Basidiomycota
Otu1309	0	0	0	5	0	0	0	0	0	0	Fungi;Zygomycota;Incertae_sedis;Mucorales;Umbelopsidaceae;Umbelopsis
Otu1308	3	0	1	6	0	0	0	0	0	0	Fungi;Basidiomycota
Otu1011	0	0	3	5	1	0	0	0	0	0	Fungi;Basidiomycota
Otu1010	0	0	5	0	1	6	0	19	2	9	Fungi;Basidiomycota;Agaricomycetes;Sebacinales;Sebacinaceae;Sebacina;Sebacina_sp
Otu1013	0	5	5	0	0	0	0	4	0	0	Fungi;Ascomycota;Sordariomycetes;Chaetosphaeriales;Chaetosphaeriaceae
Otu1012	2	25	17	0	4	0	7	53	26	22	Fungi;Basidiomycota;Agaricomycetes;Agaricales;Cortinariaceae;Cortinarius
Otu1015	0	0	0	0	0	0	0	0	6	0	Fungi
Otu1014	0	2	7	0	0	0	0	0	0	0	Fungi;Ascomycota;Leotiomycetes;Helotiales;Incertae_sedis
Otu1017	0	0	5	0	0	0	0	0	0	0	Fungi;Ascomycota;Eurotiomycetes;Chaetothyriales;Herpotrichiellaceae;Capronia;Capronia_pilosella
Otu1016	0	0	0	0	0	1	7	8	5	1	Fungi;Basidiomycota;Agaricomycetes;Agaricales;Inocybaceae;Inocybe;Inocybe_geophylla
Otu570	4	15	5	0	0	3	0	4	0	0	Fungi;Ascomycota;Sordariomycetes;Incertae_sedis;Incertae_sedis;Thyronectria;Thyronectria_berolinensis
Otu571	0	0	0	0	12	0	0	0	0	0	Fungi;Ascomycota;Sordariomycetes
Otu572	0	0	3	0	0	2	18	0	0	0	Fungi;Basidiomycota;Agaricomycetes;Boletales;Suillaceae;Suillus;Suillus_bresadolae
Otu573	8	0	1	0	0	4	11	1	14	0	Fungi;Basidiomycota;Agaricomycetes;Thelephorales;Thelephoraceae
Otu574	0	0	0	5	0	0	0	4	13	0	Fungi;Basidiomycota
Otu575	0	0	0	3	0	0	16	0	5	0	Fungi;Ascomycota;Pezizomycetes;Pezizales;Pyronemataceae;Trichophaea;Trichophaea_sp
Otu576	0	0	0	0	0	0	0	12	11	0	Fungi;Ascomycota;Pezizomycetes;Pezizales;Pezizaceae;Hydnobolites;Hydnobolites_sp_11_RH_2012
Otu577	0	4	8	0	0	2	0	20	0	13	Fungi;Ascomycota;Dothideomycetes
Otu750	1	0	0	3	0	12	24	3	1	8	Fungi;Basidiomycota;Agaricomycetes;Agaricales;Strophariaceae;Hymenogaster;Hymenogaster_griseus
Otu751	0	0	0	0	0	0	6	3	8	1	Fungi;Basidiomycota
Otu752	0	0	0	7	0	0	0	5	0	0	Fungi;Basidiomycota
Otu753	0	0	5	0	0	0	6	10	5	7	Fungi;Zygomycota;Incertae_sedis;Mortierellales;Mortierellaceae;Mortierella
Otu754	0	0	8	0	0	1	0	0	0	0	Fungi;Ascomycota;Sordariomycetes;Hypocreales;Nectriaceae
Otu755	0	0	0	0	0	0	0	8	0	0	Fungi;Basidiomycota
Otu756	0	0	0	0	0	8	0	0	0	0	Fungi;Ascomycota;Sordariomycetes;Xylariales;Amphisphaeriaceae;Phlogicylindrium;Phlogicylindrium_sp
Otu209	0	71	9	1	0	0	0	0	0	0	Fungi;Basidiomycota;Agaricomycetes;Auriculariales;Unclassified;Unclassified;Auriculariales_sp
Otu758	0	2	0	0	0	0	0	7	0	1	Fungi;Ascomycota;Sordariomycetes
Otu759	0	0	6	0	2	0	0	12	3	6	Fungi;Ascomycota;Leotiomycetes;Helotiales
Otu976	0	0	0	0	0	5	0	0	0	0	Fungi;Ascomycota;Leotiomycetes;Leotiales;Leotiaceae;Alatospora;Alatospora_sp
Otu977	0	6	0	4	2	0	1	0	0	6	Fungi
Otu970	0	0	1	0	5	4	0	4	0	3	Fungi
Otu971	0	0	0	2	0	0	3	5	4	0	Fungi;Basidiomycota
Otu972	0	0	0	5	0	0	0	0	0	0	Fungi;Ascomycota;Dothideomycetes;Pleosporales;Sporormiaceae;Preussia
Otu201	3	14	90	39	24	0	0	0	0	1	Fungi;Ascomycota;Leotiomycetes;Leotiales;Leotiaceae;Alatospora;Alatospora_sp
Otu682	0	3	0	0	0	0	9	5	0	0	Fungi;Ascomycota;Leotiomycetes;Helotiales;Rutstroemiaceae;Lambertella;Lambertella_advenula
Otu683	0	10	0	0	0	0	0	0	0	0	Fungi;Basidiomycota;Tremellomycetes;Tremellales;Incertae_sedis;Cryptococcus;Cryptococcus_aff_amylolyticus_AS_22501
Otu680	1	8	10	24	1	2	4	10	0	0	Fungi;Ascomycota;Leotiomycetes;Helotiales
Otu681	0	0	2	0	0	0	16	0	0	2	Fungi;Basidiomycota;Agaricomycetes;Agaricales;Entolomataceae;Entoloma;Entoloma_sordidulum
Otu686	0	15	0	0	0	0	0	0	0	0	Fungi;Basidiomycota;Agaricomycetes;Agaricales;Mycenaceae;Mycena;Mycena_acicula
Otu687	0	0	0	0	10	0	0	0	0	3	Fungi;Basidiomycota
Otu684	0	11	1	0	0	0	0	0	0	0	Fungi;Zygomycota;Incertae_sedis;Mortierellales;Mortierellaceae;Mortierella;Mortierella_bainieri
Otu685	8	0	2	0	0	12	15	0	0	1	Fungi;Ascomycota;Eurotiomycetes;Eurotiales;Elaphomycetaceae;Elaphomyces;Elaphomyces_muricatus
Otu688	0	0	0	0	4	5	0	0	0	12	Fungi
Otu689	0	0	1	0	0	9	0	0	0	0	Fungi;Basidiomycota;Agaricomycetes
Otu372	0	0	0	0	0	0	0	0	32	0	Fungi;Basidiomycota;Agaricomycetes;Agaricales;Inocybaceae;Inocybe;Inocybe_rimosa
Otu373	0	27	0	0	0	0	0	0	0	0	Fungi;Ascomycota;Sordariomycetes;Sordariales;Lasiosphaeriaceae;Unclassified;Lasiosphaeriaceae_sp
Otu370	0	0	0	27	0	3	0	0	0	0	Fungi;Ascomycota;Dothideomycetes;Pleosporales;Sporormiaceae;Sporormiella;Sporormiella_sp
Otu371	2	0	0	0	0	32	0	0	5	0	Fungi;Basidiomycota;Agaricomycetes;Atheliales;Atheliaceae;Byssocorticium;Byssocorticium_pulchrum
Otu376	2	26	19	17	27	1	4	4	0	16	Fungi;Ascomycota;Dothideomycetes;Pleosporales;Incertae_sedis
Otu377	0	0	0	0	0	0	0	31	0	0	Fungi;Basidiomycota;Agaricomycetes;Thelephorales;Thelephoraceae;Tomentella
Otu374	0	0	0	0	0	4	31	2	6	4	Fungi;Basidiomycota
Otu375	0	3	0	0	0	0	31	0	0	0	Fungi;Basidiomycota;Agaricomycetes;Agaricales;Inocybaceae;Inocybe;Inocybe_sp_7_RT_2012
Otu378	3	32	8	4	2	15	22	26	24	0	Fungi;Ascomycota;Leotiomycetes;Helotiales
Otu379	0	6	1	1	0	0	0	0	0	26	Fungi;Ascomycota;Sordariomycetes;Hypocreales;Clavicipitaceae;Unclassified;Clavicipitaceae_sp
Otu703	1	0	0	8	0	7	0	20	0	0	Fungi;Basidiomycota;Agaricomycetes;Sebacinales;Sebacinaceae;Sebacina;Sebacina_sp
Otu702	0	0	0	0	0	0	0	4	0	8	Fungi;Basidiomycota
Otu701	0	11	1	1	0	0	0	0	0	0	Fungi;Ascomycota;Sordariomycetes;Hypocreales
Otu700	0	0	0	0	13	0	0	0	0	0	Fungi;Basidiomycota;Agaricomycetes;Agaricales;Tricholomataceae
Otu198	8	14	11	2	18	16	18	4	0	108	Fungi;Basidiomycota;Agaricomycetes;Agaricales;Cortinariaceae;Cortinarius;Cortinarius_alpinus
Otu199	1	45	42	1	0	16	23	46	19	73	Fungi;Ascomycota;Leotiomycetes;Helotiales
Otu196	18	121	49	11	50	7	7	0	0	3	Fungi;Ascomycota;Leotiomycetes;Helotiales;Hyaloscyphaceae;Lachnum;Lachnum_virgineum
Otu707	1	0	0	11	1	13	8	14	7	8	Fungi;Ascomycota;Pezizomycetes;Pezizales;Tuberaceae;Tuber;Tuber_sp_12_KA_2010
Otu194	7	0	0	0	2	231	0	0	0	0	Fungi;Ascomycota;Leotiomycetes;Helotiales
Otu195	5	73	6	19	2	0	0	3	0	0	Fungi;Ascomycota;Leotiomycetes;Helotiales;Unclassified;Unclassified;Helotiales_sp
Otu192	2	29	70	5	9	1	0	0	8	0	Fungi;Ascomycota;Dothideomycetes;Pleosporales;Pleosporaceae;Dendryphion;Dendryphion_sp
Otu193	64	13	10	1	75	57	38	25	7	32	Fungi;Basidiomycota;Agaricomycetes;Russulales;Russulaceae
Otu190	4	52	82	19	39	5	0	12	0	0	Fungi;Ascomycota;Leotiomycetes
Otu191	18	19	21	18	5	95	91	72	23	17	Fungi;Basidiomycota;Agaricomycetes;Russulales;Russulaceae;Russula;Russula_sp_087P_UP5_3276F18
Otu705	0	8	0	0	0	8	5	2	0	3	Fungi;Basidiomycota
Otu704	0	7	1	8	4	2	0	0	0	0	Fungi
Otu1839	1	0	0	0	0	0	0	3	0	0	Fungi;Basidiomycota
Otu1838	0	0	0	0	0	0	2	0	0	0	Fungi;Ascomycota;Eurotiomycetes;Mycocaliciales;Mycocaliciaceae;Mycocalicium;Mycocalicium_victoriae
Otu1837	0	8	0	0	0	0	0	0	0	0	Fungi
Otu1836	0	0	0	3	0	0	0	0	0	0	Fungi;Basidiomycota;Agaricomycetes;Thelephorales;Thelephoraceae;Tomentella;Tomentella_sp
Otu1835	0	0	2	0	0	0	0	0	0	0	Fungi;Ascomycota;Dothideomycetes;Pleosporales;Incertae_sedis;Letendraea;Letendraea_sp
Otu1834	0	0	0	0	0	1	0	1	0	3	Fungi;Ascomycota;Pezizomycetes;Pezizales;Pyronemataceae;Genea
Otu1833	0	0	2	0	0	0	0	0	0	0	Fungi;Basidiomycota;Tremellomycetes
Otu1832	0	0	3	0	0	0	0	0	0	0	Fungi;Basidiomycota;Agaricomycetes
Otu1831	0	0	0	0	0	0	2	0	0	2	Fungi;Ascomycota;Pezizomycetes;Pezizales;Pyronemataceae;Humaria;Humaria_sp
Otu1830	0	3	0	0	0	0	0	0	0	0	Fungi;Chytridiomycota;Chytridiomycetes;Spizellomycetales;Spizellomycetaceae;Powellomyces
Otu996	0	1	3	0	1	2	0	7	0	0	Fungi
Otu997	0	0	0	0	0	6	3	0	0	0	Fungi
Otu994	0	0	0	9	0	0	0	0	0	0	Fungi;Basidiomycota;Agaricomycetes;Agaricales;Psathyrellaceae;Coprinopsis;Coprinopsis_cinerea
Otu995	0	0	6	0	0	0	0	0	0	0	Fungi;Ascomycota;Dothideomycetes;Pleosporales
Otu992	0	0	0	0	1	0	0	0	6	0	Fungi
Otu993	0	0	0	6	3	1	0	0	0	0	Fungi;Ascomycota;Orbiliomycetes;Orbiliales;Orbiliaceae;Unclassified;Orbiliaceae_sp
Otu990	0	0	0	0	2	0	4	6	0	0	Fungi;Zygomycota;Incertae_sedis;Mortierellales;Mortierellaceae
Otu991	0	0	0	5	0	0	0	0	0	0	Fungi;Ascomycota;Leotiomycetes;Helotiales;Vibrisseaceae;Phialocephala;Phialocephala_sp
Otu998	2	5	3	6	0	0	0	0	0	0	Fungi;Basidiomycota;Microbotryomycetes;Sporidiobolales;Incertae_sedis
Otu999	0	1	1	5	0	0	0	0	3	0	Fungi;Basidiomycota;Agaricomycetes;Agaricales;Tricholomataceae;Arrhenia;Arrhenia_sp
Otu1789	2	0	0	0	0	1	0	0	0	0	Fungi;Basidiomycota
Otu1788	4	0	0	0	0	0	0	0	0	0	Fungi;Ascomycota
Otu1781	0	0	0	0	0	0	0	0	5	0	Fungi
Otu1780	0	0	2	0	0	0	0	0	0	0	Fungi
Otu1783	0	0	0	0	0	0	0	0	5	0	Fungi;Ascomycota
Otu1782	0	0	2	0	0	2	0	0	0	0	Fungi;Ascomycota;Sordariomycetes;Incertae_sedis;Glomerellaceae;Colletotrichum;Colletotrichum_lilii
Otu1785	0	0	0	0	1	2	0	0	0	1	Fungi;Basidiomycota;Agaricomycetes;Agaricales;Cortinariaceae;Cortinarius
Otu1784	0	3	0	0	0	0	0	0	0	0	Fungi;Ascomycota;Eurotiomycetes;Chaetothyriales;Herpotrichiellaceae;Exophiala;Exophiala_brunnea
Otu1787	0	0	2	0	0	0	0	0	0	0	Fungi;Ascomycota;Sordariomycetes;Hypocreales;Cordycipitaceae;Isaria;Isaria_sp
Otu1786	0	0	0	0	2	0	0	0	0	0	Fungi;Ascomycota;Dothideomycetes;Pleosporales
Otu1657	0	0	0	0	0	0	0	0	4	0	Fungi;Basidiomycota;Agaricomycetes;Agaricales;Inocybaceae;Inocybe
Otu1656	0	0	0	0	0	0	0	4	0	0	Fungi;Basidiomycota
Otu1655	0	2	0	0	0	0	2	0	0	0	Fungi
Otu1654	0	0	2	0	0	0	0	0	0	0	Fungi;Basidiomycota;Agaricomycetes;Agaricales;Mycenaceae;Mycena;Mycena_alba
Otu1653	1	0	0	0	2	0	0	0	0	0	Fungi;Basidiomycota;Microbotryomycetes
Otu1652	0	0	0	2	0	0	0	0	0	0	Fungi;Ascomycota;Sordariomycetes;Hypocreales;Bionectriaceae;Bionectria;Bionectria_zelandiaenovae
Otu1651	0	8	0	2	0	1	0	0	0	0	Fungi;Ascomycota;Eurotiomycetes;Chaetothyriales;Herpotrichiellaceae
Otu1650	0	0	0	2	0	0	0	0	0	0	Fungi;Ascomycota;Eurotiomycetes;Chaetothyriales;Herpotrichiellaceae;Rhinocladiella;Rhinocladiella_sp
Otu1659	0	0	0	0	1	2	0	0	0	0	Fungi;Ascomycota;Dothideomycetes;Pleosporales
Otu1658	0	0	0	0	3	0	0	0	0	0	Fungi;Ascomycota;Leotiomycetes;Helotiales;Incertae_sedis
Otu1538	0	0	0	0	0	5	1	0	3	0	Fungi;Basidiomycota;Agaricomycetes;Agaricales;Inocybaceae;Inocybe
Otu1539	0	0	2	0	0	0	0	0	0	0	Fungi;Ascomycota
Otu49	37	507	279	105	459	18	8	18	6	27	Fungi;Ascomycota;Leotiomycetes;Helotiales
Otu48	0	0	6	806	0	0	0	0	8	0	Fungi;Basidiomycota;Agaricomycetes;Cantharellales;Ceratobasidiaceae;Thanatephorus;Thanatephorus_cucumeris
Otu47	20	0	0	0	4	144	42	69	488	13	Fungi;Basidiomycota;Agaricomycetes;Sebacinales;Sebacinaceae;Sebacina;Sebacina_sp
Otu46	75	560	257	233	231	26	4	14	25	39	Fungi;Ascomycota;Leotiomycetes;Helotiales;Incertae_sedis;Hyphodiscus;Hyphodiscus_sp
Otu45	200	509	380	271	86	21	39	30	45	36	Fungi;Ascomycota;Sordariomycetes;Hypocreales;Hypocreaceae;Trichoderma;Trichoderma_pubescens
Otu44	690	19	78	15	158	12	9	103	0	2	Fungi;Basidiomycota;Agaricomycetes;Thelephorales;Thelephoraceae;Tomentella
Otu43	45	6	56	40	36	7	0	590	17	57	Fungi;Basidiomycota;Agaricomycetes;Thelephorales;Thelephoraceae;Tomentella;Tomentella_sp_OTU221
Otu42	37	74	138	484	221	6	0	11	0	3	Fungi;Ascomycota;Dothideomycetes;Pleosporales;Incertae_sedis;Unclassified;Pleosporales_sp
Otu41	126	96	47	14	551	21	60	5	0	16	Fungi;Ascomycota;Sordariomycetes;Sordariales;Lasiosphaeriaceae;Apodus;Apodus_sp
Otu40	7	10	16	30	4	44	51	522	20	6	Fungi;Unclassified;Unclassified;Unclassified;Unclassified;Unclassified;Fungi_sp
Otu1226	0	0	4	0	0	0	0	0	0	1	Fungi;Ascomycota;Incertae_sedis;Incertae_sedis;Incertae_sedis;Chaetosphaeronema;Chaetosphaeronema_sp
Otu1227	1	2	2	7	5	0	11	0	0	0	Fungi;Ascomycota;Sordariomycetes;Chaetosphaeriales;Chaetosphaeriaceae;Dictyochaeta;Dictyochaeta_simplex
Otu1224	0	3	0	0	4	0	0	0	0	0	Fungi;Ascomycota;Sordariomycetes;Xylariales
Otu1225	0	0	0	0	0	0	4	0	0	0	Fungi;Ascomycota;Sordariomycetes;Sordariales;Chaetomiaceae
Otu1222	0	0	0	0	0	0	4	0	0	0	Fungi;Basidiomycota;Agaricomycetes;Sebacinales;Sebacinaceae;Sebacina;Sebacina_epigaea
Otu1223	0	3	3	6	1	22	2	5	3	1	Fungi;Basidiomycota
Otu1220	0	0	0	0	0	0	0	4	0	0	Fungi;Ascomycota
Otu1221	0	0	0	0	0	0	0	4	0	0	Fungi
Otu1228	0	0	5	0	0	0	0	0	0	0	Fungi;Ascomycota;Dothideomycetes;Capnodiales;Teratosphaeriaceae;Devriesia;Devriesia_sp
Otu1229	0	0	0	0	0	0	0	6	0	0	Fungi;Ascomycota;Sordariomycetes;Hypocreales;Incertae_sedis
Otu1312	0	0	0	0	0	1	0	4	0	0	Fungi;Basidiomycota
Otu1313	0	0	9	0	0	0	0	1	0	0	Fungi
Otu1310	0	0	0	0	0	6	0	0	0	0	Fungi;Basidiomycota
Otu1311	4	0	0	0	0	1	0	0	0	0	Fungi;Basidiomycota;Agaricomycetes;Sebacinales;Sebacinaceae;Sebacina
Otu1316	0	6	16	2	0	2	3	2	13	4	Fungi;Basidiomycota;Agaricomycetes;Boletales;Paxillaceae;Paxillus;Paxillus_aff_involutus_EC_Vellinga_3336_(UC)
Otu1317	0	0	0	0	0	0	0	4	0	0	Fungi;Ascomycota;Leotiomycetes;Helotiales;Helotiaceae;Articulospora;Articulospora_sp
Otu1314	0	0	3	0	0	0	0	0	0	0	Fungi;Ascomycota;Dothideomycetes;Pleosporales;Sporormiaceae;Preussia
Otu1315	2	1	0	0	0	0	0	2	0	3	Fungi;Basidiomycota;Microbotryomycetes;Sporidiobolales;Incertae_sedis
Otu1318	0	0	3	0	0	0	0	0	0	0	Fungi;Basidiomycota
Otu1319	0	0	3	0	0	0	0	0	0	0	Fungi;Ascomycota;Eurotiomycetes;Eurotiales;Trichocomaceae;Paecilomyces;Paecilomyces_marquandii
Otu567	0	0	0	0	0	5	14	3	6	4	Fungi;Basidiomycota
Otu566	1	1	20	1	0	4	7	7	0	0	Fungi;Basidiomycota;Agaricomycetes;Agaricales;Inocybaceae;Inocybe;Inocybe_jacobi
Otu565	1	5	12	0	0	0	0	0	0	0	Fungi;Ascomycota
Otu564	1	24	0	2	8	0	0	0	0	10	Fungi;Basidiomycota;Microbotryomycetes;Sporidiobolales;Incertae_sedis;Rhodotorula;Rhodotorula_nothofagi
Otu563	2	16	6	3	5	0	5	0	0	0	Fungi;Basidiomycota;Microbotryomycetes;Sporidiobolales;Incertae_sedis;Rhodotorula;Rhodotorula_pinicola
Otu562	0	0	12	0	0	0	0	0	0	0	Fungi;Ascomycota;Sordariomycetes;Chaetosphaeriales;Chaetosphaeriaceae;Dictyochaeta;Dictyochaeta_sp_OTU_096
Otu561	2	1	16	0	1	0	0	0	0	0	Fungi;Ascomycota;Leotiomycetes;Helotiales;Helotiaceae;Unclassified;Helotiaceae_sp
Otu560	9	1	9	0	2	22	0	4	0	12	Fungi;Basidiomycota;Agaricomycetes;Sebacinales;Sebacinaceae;Sebacina
Otu569	0	0	0	0	0	0	0	12	0	0	Fungi;Zygomycota;Incertae_sedis;Mortierellales;Mortierellaceae;Mortierella
Otu568	0	13	24	2	15	24	0	0	4	1	Fungi;Ascomycota;Dothideomycetes;Pleosporales;Venturiaceae
Otu1008	1	28	10	1	12	2	0	0	4	0	Fungi;Basidiomycota;Agaricomycetes;Thelephorales;Thelephoraceae;Tomentella;Tomentella_clavigera
Otu1009	0	0	0	0	0	0	0	0	11	0	Fungi;Basidiomycota;Agaricomycetes;Thelephorales;Thelephoraceae;Odontia;Odontia_sp
Otu1006	0	0	0	0	0	6	0	1	0	0	Fungi;Basidiomycota
Otu1007	0	6	10	2	1	0	0	0	0	0	Fungi;Basidiomycota;Agaricomycetes;Agaricales;Psathyrellaceae;Psathyrella;Psathyrella_squamosa
Otu1004	0	4	0	6	0	0	0	0	0	0	Fungi;Basidiomycota;Agaricomycetes;Thelephorales;Thelephoraceae;Tomentella
Otu1005	0	0	2	0	0	0	0	0	0	6	Fungi;Ascomycota;Dothideomycetes;Pleosporales;Sporormiaceae;Preussia;Preussia_sp
Otu1002	0	1	5	0	0	4	0	0	0	1	Fungi;Zygomycota;Incertae_sedis;Mortierellales;Mortierellaceae;Mortierella
Otu1003	0	5	0	5	1	0	0	0	0	1	Fungi;Ascomycota;Sordariomycetes;Hypocreales;Incertae_sedis;Myrothecium;Myrothecium_inundatum
Otu1000	0	0	0	0	0	2	0	1	11	0	Fungi;Basidiomycota
Otu1001	0	0	0	0	0	3	20	9	13	0	Fungi;Basidiomycota;Agaricomycetes;Agaricales;Inocybaceae;Inocybe;Inocybe_rimosa
Otu969	0	1	10	0	0	0	0	0	0	0	Fungi;Ascomycota;Dothideomycetes;Pleosporales;Lophiostomataceae;Lophiostoma;Lophiostoma_corticola
Otu968	5	6	8	3	3	0	0	0	0	0	Fungi;Ascomycota;Eurotiomycetes;Chaetothyriales;Herpotrichiellaceae;Cladophialophora;Cladophialophora_chaetospira
Otu219	2	0	23	0	16	69	0	9	0	26	Fungi;Basidiomycota;Tremellomycetes;Cystofilobasidiales;Cystofilobasidiaceae;Mrakia
Otu218	0	6	16	28	8	13	0	68	0	16	Fungi;Ascomycota;Sordariomycetes;Xylariales;Xylariaceae;Anthostomella;Anthostomella_sp
Otu749	1	14	0	0	2	0	0	0	0	0	Fungi;Ascomycota;Dothideomycetes;Pleosporales;Venturiaceae;Venturia;Venturia_sp
Otu748	0	0	0	0	8	0	0	0	0	0	Fungi;Ascomycota;Dothideomycetes;Pleosporales;Pleosporaceae;Alternaria;Alternaria_dianthicola
Otu747	0	3	0	0	0	3	1	0	16	0	Fungi;Basidiomycota;Agaricomycetes;Cantharellales;Clavulinaceae;Clavulina;Clavulina_sp
Otu962	0	0	0	0	2	0	0	0	5	0	Fungi;Ascomycota;Sordariomycetes;Chaetosphaeriales;Chaetosphaeriaceae;Chaetosphaeria;Chaetosphaeria_sp_olrim767
Otu745	9	0	6	0	0	0	0	0	0	0	Fungi;Ascomycota;Sordariomycetes;Incertae_sedis;Glomerellaceae;Colletotrichum;Colletotrichum_anthrisci
Otu744	0	9	0	0	0	1	0	0	10	0	Fungi;Ascomycota;Sordariomycetes;Sordariales;Chaetomiaceae
Otu967	0	8	0	0	0	0	0	0	0	0	Fungi
Otu966	0	0	0	5	0	0	0	0	0	0	Fungi;Ascomycota;Dothideomycetes;Pleosporales;Sporormiaceae;Preussia;Preussia_similis
Otu965	0	12	6	0	1	2	0	3	0	0	Fungi;Ascomycota;Leotiomycetes;Helotiales;Helotiaceae;Crocicreas
Otu964	0	0	0	0	0	0	0	0	5	0	Fungi;Basidiomycota
Otu1532	1	0	0	0	0	0	3	0	0	0	Fungi;Zygomycota;Incertae_sedis;Mortierellales;Mortierellaceae;Mortierella;Mortierella_elongatula
Otu1533	0	1	2	0	0	0	0	0	0	1	Fungi;Basidiomycota;Agaricomycetes;Auriculariales;Incertae_sedis;Exidia;Exidia_sp
Otu1180	0	0	2	1	1	5	0	1	3	1	Fungi;Basidiomycota;Agaricomycetes;Agaricales;Cortinariaceae;Cortinarius;Cortinarius_infractus
Otu1530	0	0	0	0	0	0	0	2	0	0	Fungi;Basidiomycota
Otu691	0	0	0	0	0	3	0	12	0	0	Fungi;Ascomycota;Sordariomycetes;Hypocreales;Nectriaceae;Volutella;Volutella_consors
Otu690	0	0	10	6	0	0	0	0	0	0	Fungi
Otu693	0	31	15	8	10	0	0	0	0	0	Fungi;Basidiomycota;Agaricomycetes;Agaricales;Entolomataceae;Clitopilus;Clitopilus_sp
Otu692	0	8	15	4	1	0	0	0	0	5	Fungi;Ascomycota;Dothideomycetes;Capnodiales;Teratosphaeriaceae;Devriesia;Devriesia_sp
Otu695	0	7	11	11	8	5	0	10	4	10	Fungi
Otu694	0	4	0	0	0	1	0	0	1	10	Fungi;Basidiomycota
Otu697	0	6	6	0	9	0	0	0	0	0	Fungi;Basidiomycota;Agaricomycetes;Agaricales
Otu696	0	0	1	0	1	0	2	9	0	0	Fungi;Basidiomycota;Agaricomycetes;Agaricales;Clavariaceae;Ramariopsis;Ramariopsis_flavescens
Otu699	0	2	2	19	7	0	0	13	0	9	Fungi
Otu698	0	3	0	8	1	5	0	9	3	6	Fungi;Basidiomycota;Agaricomycetes;Thelephorales;Thelephoraceae;Tomentella
Otu1537	0	0	0	0	0	0	0	0	0	2	Fungi
Otu361	5	19	4	4	6	11	9	50	11	32	Fungi;Basidiomycota;Microbotryomycetes;Sporidiobolales;Unclassified;Unclassified;Sporidiobolales_sp
Otu360	10	0	1	0	1	6	15	7	28	5	Fungi;Basidiomycota;Agaricomycetes;Sebacinales;Sebacinaceae;Sebacina;Sebacina_sp
Otu363	6	30	4	6	0	12	8	12	0	0	Fungi;Zygomycota;Incertae_sedis;Mortierellales;Mortierellaceae;Mortierella
Otu362	18	9	6	0	15	15	33	32	15	17	Fungi;Basidiomycota;Agaricomycetes;Thelephorales;Thelephoraceae
Otu365	7	6	0	10	0	4	47	9	2	3	Fungi;Basidiomycota;Agaricomycetes;Thelephorales;Thelephoraceae;Tomentella;Tomentella_terrestris
Otu364	0	42	25	6	8	3	0	27	0	7	Fungi;Ascomycota;Dothideomycetes;Capnodiales;Davidiellaceae;Davidiella;Davidiella_tassiana
Otu367	0	0	0	0	0	1	0	84	0	1	Fungi;Basidiomycota;Agaricomycetes;Agaricales;Amanitaceae;Amanita;Amanita_franchetii
Otu366	2	35	24	3	3	77	0	0	2	0	Fungi;Basidiomycota;Agaricomycetes;Agaricales;Cortinariaceae;Cortinarius;Cortinarius_acutus
Otu369	0	3	7	3	14	0	35	0	7	0	Fungi;Basidiomycota;Agaricomycetes;Thelephorales;Thelephoraceae;Tomentella;Tomentella_pilosa
Otu368	1	0	29	0	0	0	0	0	0	0	Fungi;Ascomycota;Sordariomycetes;Coniochaetales;Coniochaetaceae;Coniochaeta;Coniochaeta_cateniformis
Otu1535	0	0	0	0	0	0	0	0	6	0	Fungi;Basidiomycota
Otu1344	0	0	1	1	0	0	3	7	1	1	Fungi
Otu189	3	35	83	8	11	19	0	35	1	17	Fungi;Ascomycota;Dothideomycetes;Dothideales;Dothioraceae;Aureobasidium;Aureobasidium_pullulans
Otu188	128	8	8	8	10	18	75	14	43	8	Fungi;Basidiomycota;Agaricomycetes;Thelephorales;Thelephoraceae;Unclassified;Thelephoraceae_sp
Otu185	88	0	4	0	14	73	47	18	100	2	Fungi;Basidiomycota;Agaricomycetes;Thelephorales;Thelephoraceae;Unclassified;Thelephoraceae_sp
Otu184	12	91	75	64	26	21	18	27	13	32	Fungi;Ascomycota;Sordariomycetes;Xylariales;Xylariaceae;Xylaria;Xylaria_sp_AX114
Otu187	6	12	73	6	74	0	0	0	0	1	Fungi;Ascomycota;Sordariomycetes;Hypocreales;Nectriaceae;Cosmospora;Cosmospora_coccinea
Otu186	1	22	39	83	20	0	0	0	0	0	Fungi;Ascomycota;Leotiomycetes;Helotiales
Otu181	5	0	0	0	0	2	51	106	0	2	Fungi;Basidiomycota;Agaricomycetes;Agaricales;Cortinariaceae;Cortinarius;Cortinarius_canabarba
Otu180	31	83	99	59	8	4	0	31	0	10	Fungi;Ascomycota;Sordariomycetes;Hypocreales;Nectriaceae;Fusarium;Fusarium_oxysporum_f_sp_melonis
Otu183	3	87	33	12	20	13	0	10	18	17	Fungi;Ascomycota;Eurotiomycetes;Chaetothyriales;Herpotrichiellaceae;Cladophialophora
Otu182	2	2	16	9	80	19	0	83	45	14	Fungi
Otu1828	0	0	0	0	2	0	0	0	0	0	Fungi;Ascomycota;Dothideomycetes;Pleosporales;Incertae_sedis;Mycocentrospora;Mycocentrospora_sp
Otu1829	0	0	0	0	0	0	0	2	0	0	Fungi;Basidiomycota;Agaricomycetes;Agaricales;Hydnangiaceae;Laccaria;Laccaria_sp
Otu1824	0	2	0	0	0	0	0	0	0	0	Fungi;Ascomycota;Sordariomycetes;Sordariales;Lasiosphaeriaceae;Lasiosphaeria;Lasiosphaeria_ovina
Otu1825	0	0	1	0	1	3	0	0	0	0	Fungi;Basidiomycota
Otu1826	0	0	2	0	0	0	0	0	0	0	Fungi;Ascomycota;Sordariomycetes
Otu1827	0	0	0	0	0	0	1	0	2	4	Fungi
Otu1820	0	0	0	0	0	0	0	0	3	0	Fungi
Otu1821	1	4	2	4	3	0	0	0	0	1	Fungi;Ascomycota;Dothideomycetes;Pleosporales
Otu1822	0	3	0	0	0	0	0	0	0	0	Fungi;Ascomycota;Eurotiomycetes;Chaetothyriales;Herpotrichiellaceae;Cladophialophora;Cladophialophora_chaetospira
Otu1823	0	3	0	0	0	0	0	0	0	0	Fungi;Ascomycota;Eurotiomycetes;Chaetothyriales
Otu985	0	0	0	0	0	0	0	0	12	0	Fungi;Basidiomycota
Otu984	0	0	11	3	0	0	0	0	0	0	Fungi;Basidiomycota;Agaricomycetes;Agaricales;Psathyrellaceae;Coprinellus;Coprinellus_sp
Otu987	0	0	0	0	0	1	1	7	3	2	Fungi
Otu986	0	0	0	0	0	0	0	0	0	6	Fungi
Otu981	0	0	5	5	2	0	0	0	1	0	Fungi;Ascomycota;Eurotiomycetes;Chaetothyriales;Herpotrichiellaceae;Capronia;Capronia_sp
Otu980	0	5	0	0	0	0	3	0	0	0	Fungi;Ascomycota;Incertae_sedis;Incertae_sedis;Incertae_sedis;Tumularia;Tumularia_sp
Otu983	0	0	0	0	0	0	0	0	0	5	Fungi;Basidiomycota
Otu982	0	1	0	0	0	1	0	0	7	0	Fungi;Ascomycota;Dothideomycetes;Incertae_sedis;Incertae_sedis;Minutisphaera;Minutisphaera_japonica
Otu339	0	21	35	30	31	0	0	0	0	0	Fungi;Ascomycota;Eurotiomycetes;Chaetothyriales;Herpotrichiellaceae;Exophiala;Exophiala_sp
Otu989	0	0	0	0	0	0	0	6	0	0	Fungi;Ascomycota;Dothideomycetes;Pleosporales
Otu988	0	9	0	0	0	0	0	0	0	0	Fungi;Basidiomycota;Agaricostilbomycetes;Agaricostilbales;Chionosphaeraceae;Kurtzmanomyces
Otu336	5	22	29	19	0	0	0	0	0	4	Fungi;Ascomycota;Sordariomycetes;Xylariales;Incertae_sedis;Monographella;Monographella_cucumerina
Otu1755	0	0	0	0	0	0	0	0	0	2	Fungi;Zygomycota;Incertae_sedis
Otu337	0	2	29	0	0	6	0	9	19	21	Fungi;Basidiomycota;Agaricomycetes;Boletales;Boletaceae;Octaviania
Otu1796	0	2	0	0	0	0	0	0	0	0	Fungi;Ascomycota;Dothideomycetes;Incertae_sedis;Pseudeurotiaceae;Unclassified;Pseudeurotiaceae_sp
Otu1797	3	0	3	0	0	1	0	0	0	0	Fungi;Basidiomycota;Microbotryomycetes;Leucosporidiales;Leucosporidiaceae
Otu1794	0	0	0	0	0	3	0	0	0	0	Fungi;Ascomycota;Leotiomycetes;Helotiales;Rutstroemiaceae;Lambertella;Lambertella_advenula
Otu1795	1	0	0	0	0	0	0	0	0	2	Fungi;Ascomycota;Sordariomycetes;Hypocreales
Otu1792	0	0	2	0	0	0	0	0	0	0	Fungi;Basidiomycota;Microbotryomycetes;Sporidiobolales;Incertae_sedis;Sporobolomyces;Sporobolomyces_inositophilus
Otu1793	0	0	0	0	0	1	0	4	0	0	Fungi;Basidiomycota;Agaricomycetes;Agaricales
Otu1790	0	0	0	0	0	2	0	0	0	0	Fungi
Otu1791	0	0	2	0	0	0	0	0	0	0	Fungi;Basidiomycota
Otu1798	0	2	0	0	0	0	0	0	0	0	Fungi;Basidiomycota;Agaricomycetes;Agaricales;Tricholomataceae;Lepista;Lepista_irina
Otu1799	0	0	1	0	1	0	0	0	0	2	Fungi
Otu1644	0	0	0	0	0	0	0	2	0	1	Fungi;Zygomycota;Incertae_sedis;Mortierellales;Mortierellaceae;Mortierella
Otu1645	0	2	0	0	3	0	0	0	0	0	Fungi;Ascomycota;Leotiomycetes;Helotiales;Incertae_sedis;Catenulifera;Catenulifera_sp
Otu1646	0	0	0	0	0	0	0	0	2	0	Fungi
Otu1647	0	0	0	0	0	2	0	0	0	0	Fungi;Basidiomycota;Agaricomycetes;Russulales;Russulaceae;Russula
Otu1640	0	0	0	1	0	2	0	0	0	0	Fungi;Basidiomycota
Otu1641	1	0	1	0	4	0	0	0	0	0	Fungi;Basidiomycota;Agaricomycetes;Sebacinales;Sebacinaceae;Sebacina
Otu1642	0	1	0	1	0	2	0	0	2	2	Fungi
Otu1643	0	2	0	1	0	0	0	0	0	0	Fungi;Ascomycota
Otu1648	0	0	2	0	0	0	0	0	0	0	Fungi;Ascomycota;Pezizomycetes;Pezizales;Pyronemataceae;Trichophaea;Trichophaea_hybrida
Otu1649	0	0	0	0	0	0	0	3	0	0	Fungi;Basidiomycota;Agaricomycetes;Polyporales;Polyporaceae;Trametes;Trametes_versicolor
Otu58	46	76	88	107	45	100	69	435	60	130	Fungi
Otu59	60	845	457	213	247	46	7	61	9	28	Fungi;Ascomycota;Eurotiomycetes;Chaetothyriales;Unclassified;Unclassified;Chaetothyriales_sp
Otu50	138	625	410	304	6	6	0	1	0	9	Fungi;Ascomycota;Eurotiomycetes;Chaetothyriales;Herpotrichiellaceae;Cladophialophora;Cladophialophora_sp
Otu51	550	7	4	0	0	7	1	4	0	0	Fungi;Basidiomycota;Agaricomycetes;Thelephorales;Thelephoraceae;Tomentella
Otu52	6	0	0	0	2	2	425	0	0	20	Fungi;Ascomycota
Otu53	437	28	22	6	22	229	198	227	224	34	Fungi;Basidiomycota
Otu54	3	1	1	0	0	462	158	383	164	62	Fungi;Basidiomycota;Agaricomycetes;Russulales;Russulaceae;Russula;Russula_foetens
Otu55	290	430	345	47	47	175	65	101	616	47	Fungi;Basidiomycota;Agaricomycetes;Agaricales;Cortinariaceae;Cortinarius
Otu56	2	2	0	0	0	145	27	21	988	35	Fungi;Basidiomycota;Agaricomycetes;Agaricales;Inocybaceae;Inocybe;Inocybe_putilla
Otu57	119	221	148	115	136	147	188	362	278	124	Fungi;Ascomycota
Otu240	26	72	54	30	18	72	29	60	6	49	Fungi
Otu1253	0	0	4	0	0	0	0	0	0	0	Fungi;Basidiomycota;Tremellomycetes;Cystofilobasidiales;Cystofilobasidiaceae
Otu1252	0	0	0	0	0	0	4	0	0	0	Fungi;Basidiomycota;Agaricomycetes;Agaricales;Clavariaceae;Unclassified;Clavariaceae_sp
Otu1251	0	0	5	2	3	0	0	2	0	0	Fungi
Otu1250	0	2	4	2	2	1	0	6	0	0	Fungi
Otu1257	4	0	0	10	4	0	0	0	0	0	Fungi
Otu1256	0	0	3	0	0	0	0	0	0	0	Fungi;Ascomycota;Sordariomycetes;Incertae_sedis;Incertae_sedis;Xylomelasma;Xylomelasma_sp_ZK29/08
Otu1255	3	4	9	0	2	4	5	20	197	4	Fungi;Basidiomycota;Agaricomycetes;Agaricales;Cortinariaceae;Cortinarius
Otu1254	0	0	0	0	0	0	0	3	0	0	Fungi
Otu1259	0	2	0	0	4	0	0	0	0	1	Fungi;Basidiomycota;Agaricomycetes;Russulales;Peniophoraceae;Peniophora
Otu1258	0	0	3	0	0	0	0	0	0	0	Fungi;Basidiomycota;Agaricomycetes;Corticiales;Unclassified;Unclassified;Corticiales_sp
Otu1495	0	3	0	0	3	0	0	0	0	0	Fungi;Ascomycota;Dothideomycetes;Pleosporales;Leptosphaeriaceae;Coniothyrium
Otu1494	0	0	0	0	0	0	0	0	6	0	Fungi
Otu1497	0	0	3	0	0	0	0	0	1	0	Fungi;Basidiomycota;Agaricomycetes;Agaricales;Agaricaceae;Agaricus;Agaricus_arvensis
Otu1496	0	0	0	0	0	0	0	2	0	0	Fungi;Ascomycota;Eurotiomycetes;Chaetothyriales;Herpotrichiellaceae;Phialophora;Phialophora_hyalina
Otu1491	0	0	4	0	0	0	0	0	0	0	Fungi;Basidiomycota;Tremellomycetes;Filobasidiales;Filobasidiaceae;Cryptococcus;Cryptococcus_oeirensis
Otu1490	0	0	0	3	0	0	0	0	0	0	Fungi;Ascomycota;Dothideomycetes;Pleosporales;Lophiostomataceae;Lophiostoma;Lophiostoma_fuckelii
Otu1493	0	2	2	0	0	0	0	0	0	0	Fungi;Ascomycota
Otu1492	0	3	0	0	0	0	1	0	0	0	Fungi;Basidiomycota;Agaricomycetes;Agaricales;Amanitaceae;Amanita;Amanita_vaginata_var._alba
Otu1499	0	0	0	0	0	0	7	0	0	0	Fungi;Basidiomycota;Agaricomycetes;Agaricales;Inocybaceae;Inocybe
Otu349	2	34	43	10	8	3	0	34	4	9	Fungi;Ascomycota;Incertae_sedis;Incertae_sedis;Incertae_sedis;Chalara
Otu348	0	0	0	5	0	0	1	0	0	33	Fungi;Zygomycota;Incertae_sedis;Mortierellales;Mortierellaceae;Mortierella;Mortierella_gemmifera
Otu439	0	12	7	5	26	0	0	0	0	0	Fungi;Ascomycota;Sordariomycetes;Sordariales;Lasiosphaeriaceae;Schizothecium
Otu438	0	0	2	1	33	0	5	3	1	3	Fungi;Zygomycota;Incertae_sedis;Mucorales;Umbelopsidaceae;Umbelopsis;Umbelopsis_sp
Otu343	39	6	3	1	2	0	0	0	12	0	Fungi;Basidiomycota;Agaricomycetes;Thelephorales;Thelephoraceae;Unclassified;Thelephoraceae_sp
Otu342	2	2	0	1	11	0	0	0	0	32	Fungi;Ascomycota;Leotiomycetes;Helotiales;Helotiaceae;Claussenomyces;Claussenomyces_sp
Otu341	0	0	0	0	39	0	0	0	0	0	Fungi;Ascomycota;Orbiliomycetes;Orbiliales;Orbiliaceae
Otu340	0	5	0	0	0	0	0	3	39	0	Fungi;Basidiomycota;Agaricomycetes;Russulales;Russulaceae;Russula;Russula_font-queri
Otu347	0	27	2	0	0	1	11	0	0	6	Fungi;Ascomycota;Sordariomycetes;Coniochaetales;Coniochaetaceae
Otu346	0	0	0	0	0	5	68	0	41	33	Fungi;Basidiomycota;Agaricomycetes;Agaricales;Inocybaceae;Inocybe
Otu345	0	0	0	0	0	40	0	4	0	5	Fungi;Ascomycota;Incertae_sedis;Incertae_sedis;Incertae_sedis;Polyscytalum;Polyscytalum_sp
Otu344	14	90	56	4	4	26	32	3	10	7	Fungi;Ascomycota;Eurotiomycetes;Eurotiales;Trichocomaceae;Penicillium;Penicillium_quercetorum
Otu512	0	0	20	0	4	0	0	0	0	0	Fungi;Ascomycota;Eurotiomycetes;Chaetothyriales;Herpotrichiellaceae;Exophiala;Exophiala_attenuata
Otu513	0	0	0	14	0	0	0	0	0	0	Fungi;Ascomycota;Sordariomycetes;Hypocreales
Otu510	29	13	26	2	13	3	0	0	0	0	Fungi;Ascomycota;Leotiomycetes;Helotiales
Otu511	0	0	0	0	0	0	15	0	0	0	Fungi;Basidiomycota;Agaricomycetes
Otu516	19	96	64	76	54	12	4	0	26	0	Fungi;Ascomycota;Sordariomycetes;Hypocreales;Incertae_sedis;Ilyonectria;Ilyonectria_mors-panacis
Otu517	0	5	1	14	4	0	0	1	0	0	Fungi;Basidiomycota
Otu514	1	4	0	25	0	0	0	0	0	0	Fungi;Ascomycota;Sordariomycetes;Hypocreales;Cordycipitaceae;Simplicillium;Simplicillium_aogashimaense
Otu515	0	0	0	0	0	7	5	3	33	0	Fungi;Basidiomycota
Otu518	13	0	0	2	0	0	2	22	1	0	Fungi;Basidiomycota;Agaricomycetes;Cantharellales;Clavulinaceae;Clavulina;Clavulina_sp
Otu519	0	0	0	13	0	0	0	0	0	0	Fungi;Ascomycota;Saccharomycetes;Saccharomycetales;Dipodascaceae;Basidioascus
Otu1079	0	0	0	0	0	0	0	0	5	0	Fungi;Basidiomycota;Agaricomycetes;Agaricales;Tricholomataceae;Tricholoma;Tricholoma_sulphureum
Otu1078	0	1	0	0	4	0	0	0	0	0	Fungi;Basidiomycota;Cystobasidiomycetes;Erythrobasidiales;Incertae_sedis;Erythrobasidium;Erythrobasidium_hasegawianum
Otu1073	3	0	0	5	0	0	0	0	0	0	Fungi;Basidiomycota;Agaricomycetes;Cantharellales;Ceratobasidiaceae;Rhizoctonia;Rhizoctonia_sp
Otu1072	0	7	3	3	13	0	0	0	0	0	Fungi;Basidiomycota;Agaricomycetes
Otu1071	0	4	0	0	1	0	0	0	0	5	Fungi;Basidiomycota;Agaricomycetes;Agaricales;Tricholomataceae;Lepista;Lepista_flaccida
Otu1070	1	0	8	0	3	1	0	0	1	0	Fungi
Otu1077	0	6	0	0	0	0	0	0	0	0	Fungi;Ascomycota;Leotiomycetes;Helotiales
Otu1076	1	0	0	0	0	0	0	0	0	4	Fungi;Basidiomycota;Agaricomycetes;Cantharellales
Otu1075	0	0	0	0	1	0	0	5	0	2	Fungi;Basidiomycota;Agaricomycetes;Russulales;Russulaceae;Russula
Otu1074	0	0	0	0	0	4	0	0	0	0	Fungi;Basidiomycota
Otu228	0	0	90	1	1	1	0	0	0	0	Fungi;Ascomycota;Leotiomycetes;Helotiales
Otu229	31	51	55	37	47	19	10	9	30	31	Fungi;Ascomycota;Leotiomycetes;Incertae_sedis;Incertae_sedis;Leohumicola;Leohumicola_sp
Otu738	0	0	11	1	2	0	0	0	0	0	Fungi;Basidiomycota;Tremellomycetes;Filobasidiales;Filobasidiaceae;Cryptococcus;Cryptococcus_albidus
Otu739	2	0	0	0	0	4	12	0	0	2	Fungi;Basidiomycota
Otu220	0	2	0	0	0	3	84	4	8	0	Fungi;Basidiomycota;Agaricomycetes;Thelephorales;Thelephoraceae;Tomentella
Otu221	1	17	11	123	5	8	1	5	0	5	Fungi;Basidiomycota;Agaricomycetes;Agaricales;Agaricaceae;Lycoperdon
Otu222	0	121	3	0	1	0	0	0	0	63	Fungi;Ascomycota
Otu223	4	0	0	1	0	26	6	3	78	12	Fungi;Basidiomycota;Agaricomycetes;Thelephorales;Thelephoraceae
Otu224	0	0	0	0	0	0	66	19	54	0	Fungi;Unclassified;Unclassified;Unclassified;Unclassified;Unclassified;Fungi_sp
Otu225	3	82	103	96	55	4	10	8	0	20	Fungi;Ascomycota;Sordariomycetes;Hypocreales;Incertae_sedis;Stilbella;Stilbella_sp
Otu226	1	2	0	1	0	20	17	2	54	58	Fungi;Basidiomycota
Otu227	58	22	0	0	28	0	2	0	3	2	Fungi;Ascomycota
Otu1107	0	5	0	0	0	0	0	0	0	0	Fungi;Ascomycota;Leotiomycetes
Otu1106	7	3	0	0	0	7	1	3	0	0	Fungi;Basidiomycota
Otu1105	0	0	0	0	0	0	4	0	0	0	Fungi;Basidiomycota;Agaricomycetes
Otu1104	0	4	0	0	0	0	0	0	0	0	Fungi;Ascomycota;Dothideomycetes;Pleosporales;Phaeosphaeriaceae;Phaeosphaeria;Phaeosphaeria_fuckelii
Otu358	2	8	11	1	29	2	3	8	0	6	Fungi;Basidiomycota;Tremellomycetes;Cystofilobasidiales;Cystofilobasidiaceae;Guehomyces;Guehomyces_pullulans
Otu359	0	4	5	0	2	4	0	0	28	0	Fungi;Basidiomycota;Agaricomycetes;Sebacinales;Sebacinaceae;Unclassified;Sebacinaceae_sp
Otu428	0	24	11	5	0	0	0	0	0	0	Fungi;Ascomycota;Sordariomycetes;Hypocreales;Incertae_sedis;Unclassified;Hypocreales_sp
Otu429	5	17	23	0	0	0	7	3	0	2	Fungi;Basidiomycota;Agaricomycetes;Agaricales;Strophariaceae;Hebeloma;Hebeloma_helodes
Otu354	0	5	7	3	8	3	34	4	0	2	Fungi;Ascomycota;Pezizomycetes;Pezizales;Pyronemataceae;Otidea;Otidea_bufonia
Otu355	2	0	0	0	0	0	0	30	10	0	Fungi;Zygomycota;Incertae_sedis;Mortierellales;Mortierellaceae;Mortierella
Otu356	14	59	14	7	12	6	2	18	12	2	Fungi;Basidiomycota;Agaricomycetes;Agaricales;Inocybaceae;Inocybe;Inocybe_leiocephala
Otu357	11	40	19	8	5	1	0	30	2	0	Fungi;Ascomycota;Dothideomycetes;Pleosporales;Incertae_sedis
Otu350	0	45	10	6	4	0	0	4	0	3	Fungi;Ascomycota;Dothideomycetes;Pleosporales;Leptosphaeriaceae;Leptosphaeria;Leptosphaeria_sp_ntu59
Otu351	0	54	0	0	0	0	1	0	0	0	Fungi
Otu1109	0	0	0	0	4	1	0	0	0	0	Fungi;Basidiomycota
Otu353	0	0	35	0	0	0	0	0	0	0	Fungi;Ascomycota;Leotiomycetes
Otu646	1	10	16	3	7	15	2	33	21	18	Fungi;Basidiomycota
Otu647	2	3	14	0	0	1	0	0	6	0	Fungi;Ascomycota;Dothideomycetes;Incertae_sedis;Myxotrichaceae;Oidiodendron
Otu644	0	11	0	0	0	2	0	0	0	0	Fungi;Ascomycota;Sordariomycetes
Otu645	1	1	15	2	0	0	2	0	0	0	Fungi;Ascomycota;Eurotiomycetes;Eurotiales;Trichocomaceae;Penicillium;Penicillium_commune
Otu642	0	0	0	0	0	0	0	0	0	11	Fungi;Basidiomycota;Agaricomycetes;Agaricales
Otu643	5	1	11	9	0	2	1	0	0	0	Fungi;Ascomycota;Sordariomycetes;Chaetosphaeriales;Chaetosphaeriaceae;Chloridium
Otu640	0	0	7	0	0	0	0	12	0	0	Fungi;Basidiomycota;Agaricomycetes;Agaricales;Inocybaceae;Inocybe;Inocybe_cf_nitidiuscula_UBC_F18982
Otu641	0	11	0	0	0	0	0	0	0	0	Fungi;Ascomycota;Sordariomycetes;Hypocreales
Otu648	0	0	1	0	0	0	8	11	0	0	Fungi;Basidiomycota;Agaricomycetes;Sebacinales;Sebacinaceae;Sebacina;Sebacina_dimitica
Otu649	11	4	11	9	0	12	0	0	0	0	Fungi;Zygomycota;Incertae_sedis;Mortierellales;Mortierellaceae;Mortierella
Otu1232	0	0	0	0	0	0	5	0	0	0	Fungi;Basidiomycota
Otu1819	2	0	0	0	0	0	0	0	0	0	Fungi;Ascomycota;Sordariomycetes;Xylariales;Amphisphaeriaceae;Pestalotiopsis;Pestalotiopsis_sp_EN_10
Otu1818	1	0	0	0	1	0	0	4	0	0	Fungi;Basidiomycota;Agaricomycetes;Agaricales;Strophariaceae;Hebeloma;Hebeloma_leucosarx
Otu1811	0	0	0	0	0	0	0	2	0	0	Fungi
Otu1810	0	0	0	0	0	0	0	2	0	0	Fungi
Otu1813	0	0	2	0	1	0	0	0	0	0	Fungi;Basidiomycota;Agaricomycetes;Cantharellales;Ceratobasidiaceae;Rhizoctonia;Rhizoctonia_sp
Otu1812	0	2	0	0	0	0	0	0	0	0	Fungi;Ascomycota;Sordariomycetes;Hypocreales;Hypocreaceae;Acrostalagmus;Acrostalagmus_luteoalbus
Otu1815	0	1	0	0	0	0	0	2	0	0	Fungi
Otu1814	0	2	0	0	0	0	0	0	0	0	Fungi;Ascomycota;Eurotiomycetes;Eurotiales;Trichocomaceae;Paecilomyces;Paecilomyces_marquandii
Otu1817	0	0	0	0	2	0	0	0	0	0	Fungi;Zygomycota;Incertae_sedis;Mortierellales;Mortierellaceae;Mortierella
Otu1816	0	0	0	0	2	0	0	0	0	0	Fungi;Ascomycota;Sordariomycetes;Hypocreales
Otu1671	0	3	2	0	0	0	0	0	0	0	Fungi;Basidiomycota;Agaricomycetes;Thelephorales;Thelephoraceae;Tomentella;Tomentella_coerulea
Otu1670	0	3	0	0	0	0	0	0	0	0	Fungi;Ascomycota;Sordariomycetes;Xylariales;Incertae_sedis;Coniocessia;Coniocessia_cruciformis
Otu1673	0	1	0	2	0	0	5	0	3	1	Fungi;Basidiomycota
Otu1672	0	0	0	0	0	0	3	0	0	0	Fungi
Otu1675	0	0	0	0	0	2	0	0	0	0	Fungi
Otu1674	0	0	0	0	0	0	2	0	0	0	Fungi
Otu1677	0	0	0	0	0	0	0	0	2	0	Fungi;Basidiomycota;Agaricomycetes;Thelephorales;Thelephoraceae
Otu1676	0	2	0	0	0	0	0	0	0	0	Fungi;Basidiomycota;Agaricomycetes;Trechisporales;Hydnodontaceae;Trechispora
Otu1679	0	0	1	0	0	3	0	0	0	0	Fungi;Basidiomycota
Otu1678	0	2	0	0	0	0	0	0	0	0	Fungi;Ascomycota;Lecanoromycetes
Otu1803	0	2	0	0	0	0	0	0	0	0	Fungi;Basidiomycota
Otu1634	0	0	0	0	0	0	0	0	0	2	Fungi;Basidiomycota
Otu1186	1	5	0	0	0	0	0	0	0	0	Fungi;Basidiomycota;Agaricomycetes;Trechisporales;Hydnodontaceae;Trechispora;Trechispora_sp_2_MPM_2013
Otu1240	0	0	0	6	0	0	0	0	0	0	Fungi;Ascomycota;Incertae_sedis;Incertae_sedis;Incertae_sedis
Otu1241	0	0	3	1	0	2	0	4	5	0	Fungi;Ascomycota;Sordariomycetes;Hypocreales;Incertae_sedis;Myrothecium;Myrothecium_sp_NF_08
Otu1242	0	0	3	0	0	0	0	0	0	0	Fungi;Ascomycota
Otu1243	0	3	1	0	3	0	0	0	0	0	Fungi
Otu1244	0	0	3	0	0	0	0	0	0	0	Fungi;Ascomycota
Otu1245	0	3	0	0	0	0	0	0	0	0	Fungi;Ascomycota
Otu1246	1	0	0	0	0	0	3	3	1	2	Fungi;Zygomycota;Incertae_sedis;Mortierellales;Mortierellaceae;Mortierella
Otu1247	0	2	3	0	0	0	0	0	0	0	Fungi;Ascomycota;Sordariomycetes;Incertae_sedis;Plectosphaerellaceae;Verticillium;Verticillium_nigrescens
Otu1248	0	0	0	0	0	4	10	5	0	0	Fungi;Ascomycota;Pezizomycetes;Pezizales;Pyronemataceae;Genea;Genea_verrucosa
Otu1249	0	3	0	0	0	2	0	0	0	0	Fungi
Otu1809	0	0	0	2	0	0	0	0	0	0	Fungi
Otu1482	0	0	0	0	0	0	0	0	4	5	Fungi;Basidiomycota
Otu1483	0	0	0	0	0	0	0	3	0	0	Fungi;Ascomycota;Leotiomycetes;Geoglossales;Geoglossaceae;Geoglossum;Geoglossum_umbratile
Otu1480	0	3	0	0	0	0	0	0	0	0	Fungi;Ascomycota
Otu1481	0	0	0	0	0	1	0	0	14	0	Fungi
Otu1486	0	0	3	0	0	0	0	0	0	0	Fungi
Otu1487	0	0	0	0	0	3	0	0	0	0	Fungi
Otu1484	0	0	5	0	1	0	0	7	0	0	Fungi;Ascomycota;Eurotiomycetes;Incertae_sedis;Incertae_sedis;Sarcinomyces;Sarcinomyces_sp_SL_2011
Otu1485	0	3	0	0	0	1	0	2	0	0	Fungi;Ascomycota;Sordariomycetes;Hypocreales
Otu1488	0	0	0	1	0	0	3	0	0	0	Fungi;Basidiomycota;Agaricomycetes;Cantharellales
Otu1489	0	1	0	3	2	0	0	3	0	0	Fungi;Ascomycota
Otu83	88	72	7	5	45	113	288	340	285	20	Fungi;Basidiomycota;Agaricomycetes;Russulales;Russulaceae;Russula;Russula_sp_MHM079
Otu82	8	224	87	86	15	17	0	28	0	11	Fungi;Ascomycota;Sordariomycetes;Xylariales;Amphisphaeriaceae;Monochaetia
Otu81	0	4	0	0	0	1	2	0	0	277	Fungi;Basidiomycota;Agaricomycetes;Russulales;Russulaceae;Lactarius;Lactarius_trivialis
Otu80	164	190	152	435	21	564	184	243	291	39	Fungi;Basidiomycota;Agaricomycetes;Russulales;Russulaceae;Russula
Otu87	1	102	20	26	169	21	3	16	0	353	Fungi;Ascomycota;Leotiomycetes;Helotiales;Hyaloscyphaceae;Mycoarthris;Mycoarthris_corallina
Otu86	3	232	164	50	145	2	0	11	3	0	Fungi;Ascomycota;Sordariomycetes;Xylariales
Otu85	50	55	21	46	4	58	229	65	313	199	Fungi;Basidiomycota;Agaricomycetes;Agaricales;Cortinariaceae;Cortinarius;Cortinarius_parvannulatus
Otu84	120	457	296	38	146	25	18	8	22	11	Fungi;Ascomycota;Eurotiomycetes;Chaetothyriales;Herpotrichiellaceae;Cladophialophora;Cladophialophora_chaetospira
Otu89	50	4	20	210	24	31	27	66	106	25	Fungi;Basidiomycota;Agaricomycetes;Russulales;Russulaceae;Russula
Otu88	17	37	83	207	107	29	9	34	0	6	Fungi;Ascomycota;Sordariomycetes;Hypocreales;Nectriaceae;Gibberella
Otu975	0	3	0	0	0	0	0	0	6	0	Fungi;Zygomycota;Incertae_sedis;Mortierellales;Mortierellaceae;Mortierella
Otu595	0	13	0	0	0	0	0	0	0	8	Fungi
Otu501	0	6	0	2	16	0	0	0	0	0	Fungi;Basidiomycota;Agaricomycetes;Cantharellales;Hydnaceae;Hydnum
Otu500	0	0	0	0	0	0	0	16	0	0	Fungi;Zygomycota;Incertae_sedis;Mortierellales;Mortierellaceae;Mortierella
Otu503	0	0	0	14	0	0	0	0	0	0	Fungi;Ascomycota;Saccharomycetes;Saccharomycetales;Debaryomycetaceae;Meyerozyma;Meyerozyma_guilliermondii
Otu502	12	0	0	0	0	0	0	6	16	12	Fungi;Zygomycota;Incertae_sedis;Mortierellales;Mortierellaceae;Mortierella;Mortierella_bainieri
Otu505	0	7	29	14	0	0	1	0	0	0	Fungi;Basidiomycota;Agaricomycetes;Gomphales;Gomphaceae;Gautieria;Gautieria_morchelliformis
Otu504	0	14	2	0	0	0	0	0	0	0	Fungi;Ascomycota;Leotiomycetes;Helotiales
Otu507	0	5	18	0	2	0	0	1	0	5	Fungi
Otu506	0	5	0	0	21	0	0	0	0	0	Fungi;Basidiomycota;Agaricomycetes;Agaricales;Marasmiaceae
Otu509	15	7	39	7	1	7	5	4	1	0	Fungi;Basidiomycota;Agaricomycetes;Agaricales;Strophariaceae;Hebeloma;Hebeloma_aestivale
Otu508	0	0	1	0	0	0	0	14	0	0	Fungi;Ascomycota;Dothideomycetes;Pleosporales;Incertae_sedis;Paraphoma;Paraphoma_sp
Otu1068	0	3	2	0	0	0	0	4	0	0	Fungi;Ascomycota;Dothideomycetes;Pleosporales;Massarinaceae;Massarina;Massarina_sp
Otu1069	2	0	0	0	0	0	0	0	4	0	Fungi;Ascomycota;Dothideomycetes;Pleosporales;Incertae_sedis;Pyrenochaeta;Pyrenochaeta_unguis_hominis
Otu1060	6	5	3	0	2	5	2	5	13	5	Fungi;Basidiomycota;Tremellomycetes;Tremellales;Incertae_sedis;Cryptococcus;Cryptococcus_podzolicus
Otu1061	0	0	4	0	0	0	0	0	0	0	Fungi
Otu1062	0	0	0	0	0	0	0	0	0	5	Fungi;Ascomycota;Sordariomycetes;Xylariales;Xylariaceae;Virgaria;Virgaria_sp
Otu1063	0	0	0	0	0	4	0	0	0	0	Fungi;Ascomycota;Dothideomycetes;Pleosporales
Otu1064	0	0	0	0	0	0	0	4	0	0	Fungi;Basidiomycota;Agaricomycetes;Agaricales;Clavariaceae;Ramariopsis;Ramariopsis_sp_TENN046761
Otu1065	0	0	0	0	0	3	0	5	0	0	Fungi;Basidiomycota;Agaricomycetes;Agaricales;Strophariaceae
Otu1066	5	0	0	0	0	0	0	0	0	0	Fungi;Basidiomycota;Agaricomycetes;Agaricales;Clavariaceae;Ramariopsis;Ramariopsis_sp
Otu1067	1	0	3	11	2	1	11	2	0	5	Fungi;Ascomycota;Dothideomycetes;Pleosporales;Unclassified;Unclassified;Pleosporales_sp
Otu729	0	0	0	0	11	0	0	0	0	0	Fungi;Basidiomycota;Agaricomycetes;Thelephorales;Thelephoraceae;Unclassified;Thelephoraceae_sp
Otu728	4	4	2	0	6	0	0	8	0	0	Fungi;Basidiomycota
Otu721	1	9	10	0	7	0	0	0	0	0	Fungi;Ascomycota;Eurotiomycetes;Chaetothyriales;Herpotrichiellaceae;Cladophialophora
Otu720	0	4	1	7	0	4	4	10	6	2	Fungi;Zygomycota;Incertae_sedis;Mucorales;Umbelopsidaceae;Umbelopsis;Umbelopsis_sp
Otu723	0	10	2	0	2	0	0	0	0	0	Fungi;Ascomycota;Leotiomycetes;Leotiales;Leotiaceae;Alatospora;Alatospora_sp
Otu722	0	0	0	0	0	0	0	12	0	0	Fungi;Basidiomycota;Agaricomycetes;Agaricales;Hygrophoraceae;Hygrocybe;Hygrocybe_acutoconica_var._acutoconica
Otu725	0	0	0	0	8	0	0	0	0	0	Fungi
Otu724	0	0	8	5	0	0	0	9	0	0	Fungi
Otu727	5	0	12	14	1	1	0	4	0	1	Fungi;Zygomycota;Incertae_sedis;Mucorales;Umbelopsidaceae;Umbelopsis;Umbelopsis_ramanniana
Otu726	3	0	10	8	11	0	0	0	0	0	Fungi;Ascomycota;Dothideomycetes;Capnodiales
Otu1114	0	0	0	0	0	0	0	0	0	5	Fungi;Basidiomycota
Otu1115	0	4	0	0	0	0	0	0	0	0	Fungi;Ascomycota;Leotiomycetes;Helotiales
Otu1116	0	5	7	6	4	8	2	12	0	10	Fungi;Basidiomycota;Agaricomycetes;Agaricales;Physalacriaceae;Armillaria;Armillaria_sinapina
Otu1117	0	0	0	0	4	0	0	0	0	0	Fungi;Ascomycota;Sordariomycetes;Hypocreales
Otu1110	0	0	0	0	0	5	21	0	14	0	Fungi;Basidiomycota;Agaricomycetes;Agaricales;Inocybaceae;Inocybe;Inocybe_leucoblema
Otu1111	0	0	2	0	0	0	20	2	2	0	Fungi;Basidiomycota;Agaricomycetes;Agaricales;Inocybaceae;Inocybe;Inocybe_umbrinella
Otu1112	0	0	0	4	0	0	0	0	0	0	Fungi;Basidiomycota
Otu1113	0	5	0	0	0	0	0	0	0	0	Fungi;Basidiomycota
Otu435	0	3	1	1	0	4	46	21	4	1	Fungi;Basidiomycota;Agaricomycetes;Agaricales;Strophariaceae;Hymenogaster;Hymenogaster_sp
Otu434	0	0	4	0	20	0	0	0	0	19	Fungi;Basidiomycota;Agaricomycetes;Atheliales;Atheliaceae;Unclassified;Atheliaceae_sp
Otu437	3	26	19	29	14	4	0	17	3	1	Fungi;Basidiomycota;Agaricomycetes;Thelephorales;Thelephoraceae;Unclassified;Thelephoraceae_sp
Otu436	4	14	27	9	37	0	0	3	2	0	Fungi;Ascomycota;Dothideomycetes;Pleosporales;Lophiostomataceae;Lophiostoma
Otu431	0	9	16	4	32	0	0	5	6	0	Fungi;Ascomycota;Sordariomycetes;Xylariales;Diatrypaceae
Otu430	0	25	14	0	2	0	0	3	0	2	Fungi;Ascomycota;Dothideomycetes;Venturiales;Unclassified;Unclassified;Venturiales_sp
Otu433	11	19	29	0	10	2	5	0	0	0	Fungi;Ascomycota;Sordariomycetes;Incertae_sedis;Annulatascaceae
Otu432	0	1	23	1	8	1	0	1	2	3	Fungi
Otu655	11	33	11	20	13	7	1	6	16	14	Fungi;Basidiomycota;Agaricomycetes;Agaricales;Lycoperdaceae;Unclassified;Lycoperdaceae_sp
Otu654	0	5	21	26	2	0	0	1	0	0	Fungi;Basidiomycota;Agaricomycetes;Agaricales;Entolomataceae;Clitopilus;Clitopilus_sp_1_T_778
Otu657	0	9	0	0	1	0	1	0	0	0	Fungi;Basidiomycota;Agaricomycetes;Polyporales;Ganodermataceae;Ganoderma;Ganoderma_lucidum
Otu656	0	0	0	0	0	0	0	0	0	12	Fungi;Basidiomycota;Agaricomycetes;Agaricales
Otu651	0	17	9	5	1	2	0	6	3	1	Fungi;Basidiomycota;Agaricomycetes;Agaricales;Psathyrellaceae;Coprinellus;Coprinellus_domesticus
Otu650	0	1	0	0	2	7	0	0	0	55	Fungi;Basidiomycota;Agaricomycetes;Agaricales;Agaricaceae;Agaricus;Agaricus_sp_TL2321
Otu653	0	16	0	0	0	0	0	0	0	0	Fungi;Ascomycota;Eurotiomycetes;Chaetothyriales;Herpotrichiellaceae
Otu652	0	0	1	0	16	0	0	0	0	0	Fungi;Ascomycota;Dothideomycetes;Pleosporales;Pleomassariaceae;Unclassified;Pleomassariaceae_sp
Otu659	0	0	0	0	0	0	10	4	0	0	Fungi;Ascomycota;Incertae_sedis;Incertae_sedis;Incertae_sedis;Xenochalara;Xenochalara_juniperi
Otu658	0	10	1	0	3	2	0	0	0	0	Fungi;Ascomycota
Otu448	0	0	19	0	0	0	0	0	0	0	Fungi;Basidiomycota;Agaricomycetes;Polyporales
Otu449	3	12	4	21	3	6	14	25	11	19	Fungi
Otu1510	0	0	0	0	0	4	0	0	0	0	Fungi;Basidiomycota
Otu1511	0	4	0	0	0	0	0	0	0	1	Fungi;Basidiomycota;Agaricomycetes;Agaricales
Otu1512	0	0	0	0	2	0	0	0	0	2	Fungi;Basidiomycota;Agaricomycetes;Agaricales;Psathyrellaceae;Coprinopsis
Otu237	3	68	7	9	68	2	0	0	0	0	Fungi;Ascomycota;Eurotiomycetes;Chaetothyriales;Herpotrichiellaceae
Otu236	6	34	56	51	1	0	0	0	0	0	Fungi;Ascomycota;Sordariomycetes;Hypocreales;Hypocreaceae
Otu235	4	2	0	0	61	0	0	16	0	8	Fungi;Basidiomycota;Agaricomycetes;Thelephorales;Thelephoraceae;Unclassified;Thelephoraceae_sp
Otu234	5	70	6	4	5	1	0	0	0	0	Fungi;Ascomycota;Sordariomycetes;Hypocreales;Clavicipitaceae;Pochonia;Pochonia_bulbillosa
Otu233	74	0	42	0	17	0	0	10	4	3	Fungi;Basidiomycota;Agaricomycetes;Thelephorales;Thelephoraceae
Otu232	11	79	57	15	85	3	0	10	0	0	Fungi;Ascomycota;Leotiomycetes;Helotiales;Vibrisseaceae;Phialocephala;Phialocephala_fortinii
Otu231	1	2	4	0	0	2	64	6	6	0	Fungi
Otu230	1	25	60	4	32	15	5	63	0	13	Fungi;Ascomycota;Dothideomycetes;Pleosporales;Pleosporaceae;Epicoccum;Epicoccum_nigrum
Otu1514	0	2	0	0	0	0	0	0	0	2	Fungi
Otu239	7	0	0	0	5	141	0	0	0	85	Fungi;Basidiomycota;Agaricomycetes;Agaricales;Inocybaceae;Inocybe
Otu238	4	35	86	24	31	2	22	16	0	27	Fungi;Ascomycota
Otu1806	0	0	0	0	0	0	0	2	0	0	Fungi;Ascomycota;Dothideomycetes;Capnodiales;Mycosphaerellaceae;Septoria;Septoria_arundinacea
Otu1807	0	0	0	0	0	0	0	0	0	2	Fungi;Basidiomycota;Tremellomycetes;Filobasidiales;Filobasidiaceae;Cryptococcus;Cryptococcus_arrabidensis
Otu1804	0	0	1	0	0	0	0	2	0	0	Fungi;Zygomycota;Incertae_sedis;Mortierellales;Mortierellaceae;Mortierella;Mortierella_elongatula
Otu1805	0	2	0	0	0	0	0	0	0	0	Fungi;Basidiomycota;Microbotryomycetes;Leucosporidiales;Leucosporidiaceae;Mastigobasidium;Mastigobasidium_sp
Otu1802	0	2	0	0	0	0	3	0	0	0	Fungi;Ascomycota;Dothideomycetes;Pleosporales;Incertae_sedis;Clavariopsis;Clavariopsis_aquatica
Otu1516	0	1	0	0	0	0	1	4	0	0	Fungi;Ascomycota;Pezizomycetes;Pezizales;Pyronemataceae;Genea;Genea_balsleyi
Otu1800	0	0	0	0	0	3	0	0	0	0	Fungi;Zygomycota;Incertae_sedis;Mortierellales;Mortierellaceae;Mortierella
Otu1801	0	0	0	0	0	1	0	2	0	0	Fungi
Otu440	1	4	9	21	0	3	0	2	0	0	Fungi;Ascomycota;Eurotiomycetes;Chaetothyriales;Herpotrichiellaceae
Otu1638	0	0	0	0	0	1	0	1	0	3	Fungi
Otu1517	0	0	2	0	0	0	0	0	0	0	Fungi;Ascomycota;Leotiomycetes;Helotiales;Rutstroemiaceae;Unclassified;Rutstroemiaceae_sp
Otu1808	0	0	0	0	0	0	0	0	0	5	Fungi;Basidiomycota;Agaricomycetes;Russulales;Russulaceae;Russula
Otu441	2	0	0	2	9	12	0	0	0	23	Fungi;Basidiomycota;Agaricomycetes;Cantharellales
Otu1518	0	0	2	0	0	0	0	0	0	0	Fungi;Ascomycota;Sordariomycetes;Hypocreales;Hypocreaceae;Hypocrea
Otu1519	0	0	1	0	0	0	0	0	0	2	Fungi;Ascomycota;Sordariomycetes;Hypocreales;Nectriaceae
Otu1558	0	0	0	2	2	0	0	0	0	0	Fungi;Zygomycota;Incertae_sedis;Mortierellales;Mortierellaceae;Mortierella;Mortierella_humilis
Otu1452	0	5	0	0	0	0	0	0	0	0	Fungi;Ascomycota;Dothideomycetes;Pleosporales;Montagnulaceae;Microsphaeropsis;Microsphaeropsis_arundinis
Otu8	1	0	0	0	0	30	587	51	3231	8	Fungi;Basidiomycota;Agaricomycetes;Thelephorales;Thelephoraceae
Otu9	0	0	66	0	0	0	4246	0	0	0	Fungi;Basidiomycota;Agaricomycetes;Agaricales;Cortinariaceae;Cortinarius;Cortinarius_livido-ochraceus
Otu6	3	3	3	0	8	94	200	0	0	6737	Fungi;Ascomycota;Leotiomycetes
Otu7	1438	970	1570	3318	907	87	390	240	159	100	Fungi;Zygomycota;Incertae_sedis;Mortierellales;Mortierellaceae;Mortierella;Mortierella_amoeboidea
Otu4	4154	862	316	6333	1332	1239	619	739	1152	977	Fungi;Zygomycota;Incertae_sedis;Mortierellales;Mortierellaceae;Mortierella;Mortierella_humilis
Otu5	1478	603	426	4987	339	459	975	911	1226	662	Fungi;Zygomycota;Incertae_sedis;Mortierellales;Mortierellaceae;Mortierella
Otu2	36	27	12	31	55	28	101	13	308	6986	Fungi;Zygomycota;Incertae_sedis;Mortierellales;Mortierellaceae;Mortierella
Otu3	1754	1275	809	1241	2424	1360	7579	5188	5030	1406	Fungi;Zygomycota;Incertae_sedis;Mortierellales;Mortierellaceae;Mortierella;Mortierella_camargensis
Otu1	3595	783	619	490	346	14162	256	214	155	4914	Fungi;Basidiomycota;Agaricomycetes;Agaricales;Cortinariaceae;Cortinarius;Cortinarius_hinnuleus
Otu1559	0	2	0	0	1	0	0	0	0	0	Fungi
Otu1668	0	0	1	4	0	0	0	0	0	0	Fungi;Basidiomycota;Agaricomycetes;Agaricales;Inocybaceae;Inocybe
Otu1669	0	0	0	0	0	2	1	0	0	0	Fungi;Basidiomycota
Otu1666	0	3	0	0	0	0	0	0	0	0	Fungi
Otu1667	0	2	0	0	0	0	0	0	0	0	Fungi;Ascomycota;Dothideomycetes;Pleosporales;Incertae_sedis;Letendraea;Letendraea_sp
Otu1664	0	0	2	0	0	0	0	0	0	0	Fungi;Ascomycota
Otu1665	0	0	0	2	0	0	0	0	0	0	Fungi;Ascomycota;Dothideomycetes;Pleosporales;Lophiostomataceae;Lophiostoma;Lophiostoma_semiliberum
Otu1662	0	0	0	0	0	0	0	0	0	4	Fungi;Ascomycota;Sordariomycetes;Sordariales
Otu1663	0	0	0	0	0	0	0	0	0	2	Fungi;Zygomycota;Incertae_sedis;Mortierellales;Mortierellaceae;Mortierella;Mortierella_elongatula
Otu1660	0	0	0	0	0	0	0	0	5	0	Fungi
Otu1661	1	0	0	4	0	3	3	2	0	1	Fungi;Unclassified;Unclassified;Unclassified;Unclassified;Unclassified;Fungi_sp
Otu963	0	0	5	0	0	0	0	0	0	0	Fungi;Basidiomycota;Tremellomycetes;Filobasidiales;Filobasidiaceae;Cryptococcus;Cryptococcus_friedmannii
Otu746	0	0	0	0	0	0	0	0	26	3	Fungi;Basidiomycota;Agaricomycetes;Cantharellales;Clavulinaceae;Clavulina;Clavulina_sp
Otu961	0	0	0	0	0	0	0	0	0	6	Fungi;Basidiomycota;Tremellomycetes;Filobasidiales;Filobasidiaceae;Cryptococcus;Cryptococcus_arrabidensis
Otu960	0	0	0	0	0	7	0	0	1	0	Fungi
Otu743	3	12	1	5	0	0	11	9	0	0	Fungi;Ascomycota
Otu742	0	0	0	0	0	9	0	0	0	0	Fungi;Ascomycota;Dothideomycetes;Pleosporales;Venturiaceae
Otu741	0	4	9	5	6	0	0	3	7	1	Fungi;Ascomycota;Sordariomycetes;Hypocreales;Nectriaceae;Fusarium
Otu740	0	0	1	0	0	1	10	3	4	0	Fungi;Ascomycota;Pezizomycetes;Pezizales;Pezizaceae;Hydnobolites
Otu1279	0	0	0	0	0	0	3	0	0	0	Fungi;Basidiomycota;Agaricomycetes;Russulales;Russulaceae;Russula;Russula_foetens
Otu1278	0	0	3	3	5	0	0	1	0	0	Fungi
Otu1275	0	0	0	0	0	0	0	0	5	0	Fungi;Ascomycota;Sordariomycetes;Xylariales;Amphisphaeriaceae;Unclassified;Amphisphaeriaceae_sp
Otu1274	0	0	0	0	0	0	0	3	0	0	Fungi;Ascomycota;Saccharomycetes;Saccharomycetales;Incertae_sedis;Candida;Candida_norvegica
Otu1277	0	0	0	0	0	0	0	0	4	0	Fungi
Otu1276	0	0	0	0	0	0	0	0	0	4	Fungi;Ascomycota
Otu1271	0	4	0	0	0	0	0	0	0	0	Fungi
Otu1270	3	0	0	0	0	0	0	0	0	0	Fungi;Ascomycota;Eurotiomycetes;Eurotiales;Trichocomaceae;Penicillium;Penicillium_sp_Qpe3
Otu1273	0	0	0	0	0	0	0	0	3	0	Fungi;Ascomycota;Dothideomycetes;Pleosporales
Otu1272	0	0	0	3	0	0	3	0	0	0	Fungi;Basidiomycota;Agaricomycetes;Geastrales;Geastraceae;Geastrum;Geastrum_fimbriatum
Otu1479	0	0	0	0	0	0	6	0	0	0	Fungi;Ascomycota
Otu1478	0	0	3	0	0	0	0	0	0	0	Fungi;Ascomycota
Otu1477	0	0	3	0	0	0	0	0	0	0	Fungi;Basidiomycota;Agaricomycetes;Agaricales;Cortinariaceae;Cortinarius;Cortinarius_urbicus
Otu1476	0	0	0	0	0	0	3	1	0	0	Fungi;Basidiomycota
Otu1475	0	0	3	0	0	0	0	0	0	0	Fungi;Basidiomycota;Microbotryomycetes;Sporidiobolales;Incertae_sedis;Rhodotorula
Otu1474	0	0	3	0	0	0	0	0	0	0	Fungi;Ascomycota;Dothideomycetes;Pleosporales;Montagnulaceae;Paraconiothyrium;Paraconiothyrium_hawaiiense
Otu1473	0	1	4	1	1	0	0	0	0	0	Fungi
Otu1472	1	1	1	0	0	1	0	3	0	0	Fungi;Basidiomycota;Agaricomycetes;Agaricales;Inocybaceae;Inocybe;Inocybe_pseudoreducta
Otu1471	0	0	0	0	0	0	0	0	0	3	Fungi;Basidiomycota;Tremellomycetes;Filobasidiales;Filobasidiaceae;Cryptococcus;Cryptococcus_albidus
Otu1470	0	4	0	0	4	0	0	0	0	0	Fungi;Ascomycota;Dothideomycetes;Pleosporales;Sporormiaceae
Otu1589	0	0	1	0	0	0	2	0	0	0	Fungi;Basidiomycota
Otu1588	0	0	0	0	0	0	0	3	0	0	Fungi;Basidiomycota;Agaricomycetes;Agaricales;Psathyrellaceae;Coprinellus;Coprinellus_sp_CBM_FB_33076
Otu98	73	5	0	0	381	7	6	1	0	6	Fungi;Basidiomycota;Agaricomycetes;Agaricales;Strophariaceae;Hebeloma
Otu99	37	0	39	4	0	219	35	181	0	10	Fungi;Basidiomycota;Agaricomycetes;Sebacinales;Sebacinaceae;Sebacina;Sebacina_sp
Otu94	203	245	25	28	112	20	30	7	49	12	Fungi;Basidiomycota;Agaricomycetes;Thelephorales;Thelephoraceae;Pseudotomentella;Pseudotomentella_sp
Otu95	54	41	176	1	66	21	37	193	110	30	Fungi;Zygomycota;Incertae_sedis;Mortierellales;Mortierellaceae;Mortierella
Otu96	3	222	71	45	40	23	31	27	2	11	Fungi;Ascomycota;Leotiomycetes;Helotiales;Dermateaceae;Mollisia;Mollisia_dextrinospora
Otu97	4	35	0	2	56	8	29	2	4	187	Fungi;Ascomycota;Dothideomycetes;Pleosporales;Sporormiaceae;Preussia
Otu90	15	242	62	7	26	5	0	0	0	1	Fungi;Ascomycota;Leotiomycetes;Helotiales
Otu91	6	9	0	18	0	12	63	1	217	0	Fungi;Basidiomycota;Agaricomycetes;Cantharellales;Hydnaceae;Hydnum;Hydnum_repandum
Otu92	17	11	5	5	216	23	0	16	0	3	Fungi;Basidiomycota;Agaricomycetes;Sebacinales;Sebacinaceae;Sebacina;Sebacina_sp
Otu93	0	2	1	195	2	0	0	3	0	33	Fungi;Ascomycota;Incertae_sedis;Incertae_sedis;Incertae_sedis;Chaetosphaeronema
Otu1551	0	0	0	0	0	2	0	0	0	0	Fungi;Basidiomycota;Agaricomycetes;Auriculariales;Incertae_sedis
Otu1055	0	0	2	5	1	1	2	7	1	3	Fungi;Basidiomycota;Agaricomycetes;Agaricales;Entolomataceae;Entoloma;Entoloma_sericeum
Otu1054	0	5	0	1	0	3	0	0	0	0	Fungi;Basidiomycota;Agaricomycetes;Polyporales;Meruliaceae;Steccherinum;Steccherinum_sp
Otu1057	0	4	0	0	0	0	0	0	0	0	Fungi;Basidiomycota;Agaricomycetes;Trechisporales;Hydnodontaceae;Unclassified;Hydnodontaceae_sp
Otu1056	0	0	0	0	0	1	0	0	9	0	Fungi;Basidiomycota;Agaricomycetes;Agaricales;Inocybaceae;Inocybe
Otu1051	0	0	0	0	0	0	0	5	0	0	Fungi;Ascomycota;Sordariomycetes;Hypocreales;Nectriaceae;Mariannaea;Mariannaea_sp
Otu1050	0	0	1	0	0	1	1	6	1	0	Fungi
Otu1053	7	0	0	0	0	3	0	0	0	0	Fungi;Basidiomycota;Agaricomycetes;Agaricales;Cortinariaceae;Cortinarius;Cortinarius_venetus
Otu1052	0	0	4	0	0	0	0	0	0	0	Fungi
Otu534	0	14	0	0	9	0	0	0	0	0	Fungi;Ascomycota;Dothideomycetes;Pleosporales
Otu535	0	0	0	0	0	0	0	0	15	0	Fungi;Basidiomycota;Microbotryomycetes;Leucosporidiales;Leucosporidiaceae;Mastigobasidium;Mastigobasidium_sp
Otu536	3	28	0	2	0	4	10	11	7	0	Fungi;Basidiomycota;Agaricomycetes;Agaricales;Entolomataceae;Entoloma;Entoloma_sp_OTU275
Otu537	0	14	14	5	0	7	11	0	0	0	Fungi;Ascomycota;Sordariomycetes;Xylariales;Amphisphaeriaceae;Discostroma;Discostroma_fuscellum
Otu1059	0	0	0	4	0	0	0	0	0	0	Fungi;Basidiomycota;Agaricomycetes
Otu1058	2	4	4	0	0	0	0	0	0	0	Fungi;Ascomycota;Eurotiomycetes;Chaetothyriales;Herpotrichiellaceae;Cladophialophora
Otu532	0	0	0	0	0	0	0	0	14	0	Fungi;Zygomycota;Incertae_sedis;Mortierellales;Mortierellaceae;Mortierella
Otu533	2	0	0	0	0	9	17	0	21	0	Fungi;Basidiomycota
Otu1297	0	0	3	0	0	0	0	0	0	0	Fungi;Basidiomycota;Agaricomycetes;Agaricales;Tricholomataceae;Lepista;Lepista_luscina
Otu1296	0	5	1	3	0	0	0	0	0	0	Fungi;Ascomycota;Dothideomycetes;Pleosporales;Incertae_sedis;Paraphoma;Paraphoma_sp
Otu1295	0	0	0	0	0	0	6	5	2	0	Fungi;Basidiomycota;Agaricomycetes;Agaricales;Inocybaceae;Inocybe;Inocybe_fraudans
Otu1294	0	0	0	0	0	0	0	0	0	3	Fungi;Ascomycota;Sordariomycetes;Sordariales;Lasiosphaeriaceae;Podospora;Podospora_curvicolla
Otu1293	0	3	2	0	0	2	0	1	0	0	Fungi
Otu1292	0	0	0	3	0	0	0	0	0	0	Fungi;Basidiomycota;Tremellomycetes
Otu1291	1	0	2	0	0	1	0	0	0	3	Fungi;Basidiomycota
Otu1290	0	2	3	0	0	0	0	0	0	1	Fungi;Basidiomycota;Agaricomycetes;Agaricales;Agaricaceae;Lepiota;Lepiota_clypeolaria
Otu1299	2	3	0	0	4	6	0	1	0	3	Fungi;Basidiomycota;Agaricomycetes;Russulales;Russulaceae;Russula;Russula_maculata
Otu1298	0	0	0	0	0	0	6	3	0	0	Fungi;Basidiomycota
Otu408	0	0	0	0	0	0	5	2	31	7	Fungi;Ascomycota;Pezizomycetes;Pezizales;Pezizaceae;Chromelosporium;Chromelosporium_sp
Otu409	0	0	41	0	0	0	0	0	0	0	Fungi;Basidiomycota;Agaricomycetes;Thelephorales;Thelephoraceae;Tomentella
Otu1123	0	0	4	0	0	0	0	0	0	2	Fungi;Ascomycota;Sordariomycetes;Coniochaetales;Coniochaetaceae;Unclassified;Coniochaetaceae_sp
Otu1122	0	0	0	0	0	0	0	0	4	0	Fungi;Ascomycota;Leotiomycetes
Otu1125	3	4	4	0	0	0	0	0	0	0	Fungi;Ascomycota;Sordariomycetes;Sordariales;Chaetomiaceae;Chaetomium;Chaetomium_nigricolor
Otu1124	0	0	0	4	0	0	0	0	0	0	Fungi;Ascomycota;Leotiomycetes;Incertae_sedis;Incertae_sedis;Collophora;Collophora_paarla
Otu1127	0	5	0	0	0	0	0	0	0	0	Fungi;Ascomycota;Sordariomycetes;Hypocreales;Clavicipitaceae;Metarhizium;Metarhizium_anisopliae
Otu1126	0	0	0	0	4	0	0	0	0	0	Fungi;Ascomycota;Leotiomycetes;Helotiales;Incertae_sedis;Tetracladium
Otu1129	0	0	0	0	0	1	0	5	1	0	Fungi;Basidiomycota
Otu1128	0	0	0	0	4	0	0	0	0	0	Fungi;Basidiomycota;Agaricomycetes;Thelephorales;Thelephoraceae;Unclassified;Thelephoraceae_sp
Otu402	1	5	26	2	1	0	10	2	2	5	Fungi;Ascomycota;Sordariomycetes;Sordariales
Otu403	0	0	0	0	0	0	0	0	22	0	Fungi
Otu404	0	0	0	0	0	55	13	9	0	0	Fungi;Basidiomycota;Agaricomycetes;Cantharellales;Clavulinaceae;Unclassified;Clavulinaceae_sp
Otu405	0	1	1	0	62	3	14	3	7	24	Fungi;Basidiomycota;Agaricomycetes;Thelephorales;Thelephoraceae;Tomentella;Tomentella_lapida
Otu406	2	22	26	8	16	0	0	4	0	2	Fungi;Ascomycota;Dothideomycetes;Pleosporales
Otu407	4	11	24	0	16	8	0	6	0	14	Fungi;Ascomycota;Leotiomycetes;Helotiales;Hyaloscyphaceae;Unclassified;Hyaloscyphaceae_sp
Otu660	0	9	0	0	0	0	0	0	0	0	Fungi;Ascomycota
Otu661	0	10	0	1	1	5	0	12	0	13	Fungi;Basidiomycota
Otu662	0	0	0	0	0	0	0	16	0	0	Fungi;Basidiomycota
Otu663	0	0	0	2	10	0	0	0	0	0	Fungi;Ascomycota;Dothideomycetes;Pleosporales;Incertae_sedis;Pyrenochaeta;Pyrenochaeta_nobilis
Otu664	1	1	7	1	1	0	1	22	0	4	Fungi;Basidiomycota;Agaricomycetes;Agaricales
Otu665	0	0	0	0	0	0	3	3	11	0	Fungi
Otu666	10	3	2	10	0	3	5	5	0	0	Fungi;Basidiomycota;Microbotryomycetes;Sporidiobolales;Incertae_sedis
Otu667	9	0	0	0	0	3	0	0	0	0	Fungi;Zygomycota;Incertae_sedis;Mortierellales;Mortierellaceae;Mortierella;Mortierella_parvispora
Otu884	0	0	0	5	6	1	0	0	0	0	Fungi;Basidiomycota;Tremellomycetes;Filobasidiales;Filobasidiaceae;Cryptococcus;Cryptococcus_cerealis
Otu885	2	6	3	11	0	1	0	0	2	0	Fungi
Otu886	0	0	3	0	0	0	6	0	0	0	Fungi;Basidiomycota;Agaricomycetes;Thelephorales;Thelephoraceae;Tomentella;Tomentella_sp_OTU202
Otu887	0	0	0	0	0	0	0	6	0	2	Fungi;Ascomycota;Dothideomycetes;Pleosporales;Leptosphaeriaceae
Otu880	0	0	0	0	0	4	0	2	10	0	Fungi
Otu881	2	0	0	0	10	0	0	0	0	1	Fungi;Basidiomycota;Microbotryomycetes
Otu882	0	8	5	0	0	1	0	0	0	0	Fungi;Ascomycota;Dothideomycetes;Pleosporales;Sporormiaceae;Preussia;Preussia_aemulans
Otu883	0	0	0	0	0	0	0	6	0	2	Fungi;Basidiomycota
Otu390	7	3	0	0	3	3	59	1	0	9	Fungi;Basidiomycota;Agaricomycetes;Thelephorales;Thelephoraceae;Tomentella
Otu391	0	15	31	6	8	7	0	20	2	3	Fungi
Otu392	0	26	4	0	1	0	0	0	0	0	Fungi;Ascomycota;Eurotiomycetes;Chaetothyriales;Herpotrichiellaceae;Cladophialophora;Cladophialophora_sp_olrim407
Otu393	3	6	43	21	5	3	6	7	0	6	Fungi;Ascomycota;Incertae_sedis;Incertae_sedis;Incertae_sedis;Cordana;Cordana_ellipsoidea
Otu394	8	0	3	30	0	0	0	0	0	0	Fungi;Ascomycota;Dothideomycetes;Pleosporales;Phaeosphaeriaceae;Phaeosphaeriopsis;Phaeosphaeriopsis_sp
Otu395	30	0	0	0	0	0	19	0	2	0	Fungi;Basidiomycota;Agaricomycetes;Thelephorales;Thelephoraceae;Odontia;Odontia_sp
Otu396	0	16	32	7	0	0	0	16	0	0	Fungi;Ascomycota;Sordariomycetes;Hypocreales;Nectriaceae;Volutella;Volutella_sp
Otu397	0	0	1	11	0	0	0	0	21	0	Fungi
Otu398	0	0	0	0	0	0	8	28	0	0	Fungi
Otu399	0	25	30	1	2	0	0	0	0	3	Fungi;Ascomycota;Eurotiomycetes;Chaetothyriales;Herpotrichiellaceae;Cladophialophora;Cladophialophora_sp_olrim407
Otu714	0	0	0	0	0	4	10	0	0	0	Fungi;Ascomycota;Eurotiomycetes;Chaetothyriales
Otu715	0	0	4	0	0	0	0	0	8	0	Fungi
Otu716	0	0	0	0	10	0	0	0	9	11	Fungi;Basidiomycota;Agaricomycetes;Thelephorales;Thelephoraceae;Tomentella
Otu717	0	0	0	0	0	0	0	10	0	0	Fungi;Basidiomycota;Agaricomycetes;Thelephorales;Thelephoraceae
Otu710	0	0	0	0	0	0	10	0	0	0	Fungi;Zygomycota;Incertae_sedis;Mortierellales;Mortierellaceae;Mortierella
Otu711	0	3	1	0	0	4	21	36	6	2	Fungi;Ascomycota;Pezizomycetes;Pezizales;Pyronemataceae;Humaria;Humaria_sp
Otu712	7	1	0	0	0	9	0	0	0	0	Fungi;Basidiomycota;Agaricomycetes;Thelephorales;Thelephoraceae;Tomentella;Tomentella_sp_src834
Otu713	0	0	0	0	0	0	0	10	0	0	Fungi;Ascomycota;Sordariomycetes;Sordariales;Lasiosphaeriaceae;Apodus;Apodus_sp
Otu248	2	53	18	21	1	0	0	0	0	1	Fungi;Ascomycota;Sordariomycetes;Hypocreales
Otu249	9	8	42	9	61	15	60	53	29	0	Fungi;Basidiomycota;Agaricomycetes;Polyporales;Unclassified;Unclassified;Polyporales_sp
Otu718	0	1	0	0	1	3	0	0	0	20	Fungi;Ascomycota;Sordariomycetes;Incertae_sedis;Incertae_sedis;Myrmecridium;Myrmecridium_schulzeri
Otu719	12	0	0	0	0	15	0	0	1	0	Fungi;Basidiomycota
Otu1873	0	0	0	0	0	0	0	0	0	5	Fungi;Basidiomycota;Agaricomycetes;Cantharellales;Clavulinaceae;Clavulina;Clavulina_sp
Otu1872	0	0	3	0	1	0	0	0	0	0	Fungi;Ascomycota
Otu1871	0	0	0	0	0	0	0	2	0	0	Fungi;Basidiomycota
Otu1870	0	0	0	0	0	0	2	0	0	0	Fungi;Ascomycota;Leotiomycetes;Helotiales;Hyaloscyphaceae;Lachnum
Otu1877	0	0	2	0	0	0	0	0	0	0	Fungi
Otu1876	0	0	0	0	0	0	0	0	0	3	Fungi;Basidiomycota
Otu1875	0	0	0	0	0	0	0	0	2	0	Fungi;Ascomycota;Sordariomycetes;Xylariales
Otu1874	0	0	0	2	0	0	0	0	0	0	Fungi;Basidiomycota
Otu1879	0	0	0	0	0	0	0	0	2	0	Fungi
Otu1878	1	0	0	0	2	0	0	0	0	0	Fungi;Ascomycota;Dothideomycetes;Pleosporales;Leptosphaeriaceae
Otu866	0	0	0	0	0	6	0	0	0	0	Fungi;Ascomycota;Sordariomycetes
Otu867	0	5	6	0	2	0	0	6	0	0	Fungi;Ascomycota;Eurotiomycetes;Chaetothyriales;Herpotrichiellaceae;Exophiala
Otu864	0	0	0	0	0	0	0	13	0	0	Fungi;Basidiomycota;Agaricomycetes;Agaricales;Cortinariaceae;Cortinarius;Cortinarius_magisporus
Otu865	0	1	0	7	0	0	0	0	0	0	Fungi
Otu862	0	0	0	0	0	0	0	0	6	0	Fungi;Basidiomycota
Otu863	0	0	3	0	1	8	3	7	0	0	Fungi
Otu860	0	1	2	0	0	0	0	7	0	6	Fungi;Basidiomycota;Agaricomycetes;Thelephorales;Thelephoraceae
Otu861	0	0	0	0	0	0	0	8	2	0	Fungi
Otu868	1	9	5	0	6	0	0	0	0	0	Fungi;Basidiomycota;Agaricomycetes;Sebacinales;Unclassified;Unclassified;Sebacinales_sp
Otu869	0	0	0	6	0	0	0	0	0	0	Fungi;Basidiomycota
Otu1619	0	0	0	0	0	0	3	0	0	0	Fungi;Basidiomycota;Agaricomycetes;Agaricales;Inocybaceae;Inocybe;Inocybe_pseudoreducta
Otu1618	0	0	0	0	3	0	0	0	0	0	Fungi;Ascomycota;Leotiomycetes;Helotiales;Helotiaceae
Otu1613	0	0	0	0	0	0	0	0	2	0	Fungi;Basidiomycota;Agaricomycetes;Atheliales;Atheliaceae;Amphinema;Amphinema_byssoides
Otu1612	0	0	0	0	2	0	0	0	0	0	Fungi;Ascomycota;Leotiomycetes
Otu1611	1	0	4	0	0	0	0	0	2	0	Fungi;Basidiomycota;Agaricomycetes;Thelephorales;Thelephoraceae;Tomentella;Tomentella_sp_src857
Otu1610	0	0	0	0	0	3	0	2	2	0	Fungi;Basidiomycota
Otu1617	0	0	0	2	0	0	0	0	0	0	Fungi;Ascomycota;Pezizomycetes;Pezizales;Ascobolaceae;Ascobolus;Ascobolus_crenulatus
Otu1616	0	3	0	0	1	0	0	0	0	0	Fungi;Basidiomycota;Microbotryomycetes;Sporidiobolales;Incertae_sedis;Rhodotorula
Otu1615	0	0	0	0	0	2	0	0	0	0	Fungi
Otu1614	0	0	0	0	0	2	0	2	2	4	Fungi;Ascomycota;Pezizomycetes;Pezizales;Pyronemataceae;Humaria
Otu1727	0	0	0	2	0	0	0	1	0	1	Fungi
Otu1726	0	0	0	0	0	0	0	0	3	0	Fungi;Basidiomycota
Otu1725	0	0	2	0	0	0	0	0	0	0	Fungi
Otu1724	0	2	0	0	0	0	0	0	0	0	Fungi;Basidiomycota
Otu1723	0	3	0	0	2	0	0	0	0	0	Fungi;Basidiomycota;Tremellomycetes;Tremellales;Incertae_sedis;Cryptococcus;Cryptococcus_sp_QMW_2009a
Otu1722	0	2	0	0	0	0	0	0	0	0	Fungi;Basidiomycota;Agaricomycetes
Otu1721	0	0	0	0	0	0	0	4	0	0	Fungi
Otu1720	0	4	0	2	0	0	3	7	0	2	Fungi;Basidiomycota
Otu1729	0	0	2	0	0	0	0	0	0	0	Fungi;Basidiomycota;Microbotryomycetes;Sporidiobolales;Incertae_sedis;Rhodotorula;Rhodotorula_yarrowii
Otu1728	0	2	0	5	0	0	0	2	0	0	Fungi
Otu1268	0	0	3	0	2	4	0	0	0	1	Fungi;Basidiomycota;Agaricomycetes;Thelephorales;Thelephoraceae;Tomentella;Tomentella_cinerascens
Otu1269	0	7	0	0	0	0	0	2	0	1	Fungi;Basidiomycota;Agaricomycetes;Thelephorales;Thelephoraceae;Tomentella
Otu1262	0	0	4	0	4	0	0	0	0	0	Fungi;Basidiomycota;Agaricomycetes;Agaricales;Pluteaceae;Pluteus;Pluteus_eludens
Otu1263	0	0	3	0	0	0	0	0	0	0	Fungi;Ascomycota;Leotiomycetes;Rhytismatales;Rhytismataceae
Otu1260	1	0	0	0	0	0	4	0	0	0	Fungi;Basidiomycota
Otu1261	1	0	4	0	0	2	0	0	0	0	Fungi;Ascomycota;Pezizomycetes;Pezizales;Pyronemataceae
Otu1266	0	0	0	0	1	0	3	2	0	2	Fungi;Basidiomycota;Microbotryomycetes;Sporidiobolales;Incertae_sedis
Otu1267	0	0	4	0	0	0	0	0	0	0	Fungi;Ascomycota
Otu1264	0	11	1	0	0	3	11	2	0	0	Fungi;Basidiomycota;Agaricomycetes;Agaricales;Fistulinaceae;Porodisculus;Porodisculus_sp
Otu1265	0	0	0	0	0	0	0	0	0	4	Fungi;Ascomycota
Otu1468	0	0	0	1	0	0	2	0	0	6	Fungi;Ascomycota
Otu1469	0	0	0	0	0	3	0	0	0	0	Fungi;Ascomycota
Otu1464	0	4	0	3	0	0	0	0	0	0	Fungi;Ascomycota;Sordariomycetes;Chaetosphaeriales;Chaetosphaeriaceae;Chloridium;Chloridium_sp
Otu1465	0	0	0	0	1	3	0	0	0	0	Fungi;Zygomycota;Incertae_sedis;Mortierellales;Unclassified;Unclassified;Mortierellales_sp
Otu1466	0	7	2	4	6	0	0	0	0	0	Fungi;Basidiomycota;Agaricomycetes;Auriculariales;Incertae_sedis
Otu1467	0	0	0	0	3	0	3	0	0	0	Fungi;Basidiomycota;Tremellomycetes;Filobasidiales;Filobasidiaceae;Cryptococcus;Cryptococcus_arrabidensis
Otu1460	0	0	4	0	0	3	0	1	0	0	Fungi;Basidiomycota;Agaricomycetes;Sebacinales;Sebacinaceae;Sebacina;Sebacina_sp
Otu1461	0	0	0	0	4	0	0	0	0	0	Fungi;Basidiomycota
Otu1462	0	0	0	0	0	0	4	0	0	0	Fungi
Otu1463	0	5	0	0	4	0	6	0	0	0	Fungi;Chytridiomycota;Chytridiomycetes;Spizellomycetales;Spizellomycetaceae;Spizellomyces
Otu1598	0	0	2	0	0	0	0	0	0	0	Fungi;Ascomycota
Otu1599	1	1	0	0	2	2	0	0	0	8	Fungi;Ascomycota;Dothideomycetes;Pleosporales
Otu1590	0	0	0	0	0	0	0	0	2	0	Fungi;Basidiomycota;Agaricomycetes;Thelephorales;Thelephoraceae;Pseudotomentella;Pseudotomentella_sp
Otu1591	0	0	0	0	0	2	0	0	0	0	Fungi
Otu1592	0	2	0	0	0	0	0	0	0	0	Fungi
Otu1593	0	0	0	0	0	2	0	0	0	0	Fungi;Basidiomycota;Agaricomycetes;Thelephorales;Thelephoraceae;Tomentella
Otu1594	0	0	2	0	0	0	0	0	0	0	Fungi
Otu1595	0	0	0	0	0	0	0	2	7	3	Fungi;Basidiomycota
Otu1596	0	0	0	0	0	0	2	0	0	0	Fungi;Ascomycota;Eurotiomycetes;Chaetothyriales;Herpotrichiellaceae;Capronia;Capronia_pilosella
Otu1597	0	0	0	2	0	0	0	0	0	0	Fungi;Ascomycota;Pezizomycetes;Pezizales;Sarcosomataceae
Otu1042	0	5	0	1	0	0	0	0	0	0	Fungi
Otu1043	0	0	5	0	2	0	0	0	0	0	Fungi;Basidiomycota;Microbotryomycetes;Sporidiobolales;Incertae_sedis;Sporobolomyces;Sporobolomyces_aff_jilinensis_MCA_3774
Otu529	0	13	9	0	0	7	0	0	3	3	Fungi;Ascomycota;Dothideomycetes;Capnodiales;Mycosphaerellaceae
Otu528	1	0	4	18	0	0	0	0	0	0	Fungi;Ascomycota;Dothideomycetes;Pleosporales;Montagnulaceae;Paraconiothyrium;Paraconiothyrium_sp
Otu1046	0	2	0	0	0	0	7	0	0	0	Fungi;Basidiomycota;Microbotryomycetes;Sporidiobolales;Incertae_sedis
Otu1047	0	0	0	0	0	0	0	5	0	0	Fungi;Ascomycota;Leotiomycetes;Helotiales;Incertae_sedis;Hyalodendriella
Otu1044	0	0	0	0	0	0	0	7	0	0	Fungi;Ascomycota;Sordariomycetes
Otu1045	0	0	0	5	0	0	0	0	0	0	Fungi;Ascomycota;Dothideomycetes;Pleosporales
Otu523	0	0	0	15	0	0	0	0	0	0	Fungi;Ascomycota;Sordariomycetes;Hypocreales;Hypocreaceae;Mycogone;Mycogone_perniciosa
Otu522	0	8	46	12	3	6	4	29	3	6	Fungi;Basidiomycota;Agaricomycetes;Agaricales;Entolomataceae;Entoloma
Otu521	0	1	0	0	0	21	0	0	0	0	Fungi
Otu520	2	15	0	5	0	4	0	14	2	2	Fungi;Basidiomycota
Otu527	1	16	0	0	0	0	0	2	0	0	Fungi;Basidiomycota;Agaricomycetes;Thelephorales;Thelephoraceae;Tomentella
Otu526	0	0	22	0	0	0	0	0	0	0	Fungi;Basidiomycota;Agaricomycetes;Cantharellales;Ceratobasidiaceae
Otu525	0	0	0	0	17	0	0	0	0	0	Fungi;Ascomycota
Otu524	1	4	15	3	4	0	0	0	0	8	Fungi;Ascomycota
Otu1284	0	0	0	0	0	3	0	0	0	0	Fungi;Ascomycota;Dothideomycetes;Dothideales;Dothideaceae;Dothidea;Dothidea_insculpta
Otu1285	0	0	0	0	0	0	0	5	1	0	Fungi;Basidiomycota
Otu1286	0	3	0	0	0	0	0	0	0	0	Fungi;Basidiomycota;Agaricomycetes;Agaricales;Cortinariaceae;Cortinarius;Cortinarius_alboviolaceus
Otu1287	0	0	0	0	0	0	0	5	0	0	Fungi
Otu1280	1	0	0	0	0	5	0	5	3	0	Fungi
Otu1281	0	1	3	4	0	3	2	5	0	0	Fungi;Basidiomycota
Otu1282	0	0	0	0	1	0	0	0	0	3	Fungi;Zygomycota;Incertae_sedis;Mortierellales;Mortierellaceae;Mortierella;Mortierella_gamsii
Otu1283	0	0	2	0	0	3	1	5	9	0	Fungi;Ascomycota;Pezizomycetes;Pezizales;Pyronemataceae;Humaria;Humaria_sp
Otu1288	0	7	2	3	2	1	0	0	0	0	Fungi;Ascomycota;Eurotiomycetes;Chaetothyriales;Herpotrichiellaceae;Capronia;Capronia_semi-immersa
Otu1289	0	0	0	0	0	3	0	0	0	0	Fungi
Otu417	7	24	2	0	5	19	0	0	6	28	Fungi;Basidiomycota;Agaricomycetes;Thelephorales;Thelephoraceae;Unclassified;Thelephoraceae_sp
Otu416	1	2	2	45	0	2	2	5	0	3	Fungi;Ascomycota;Dothideomycetes;Capnodiales;Incertae_sedis;Capnobotryella;Capnobotryella_sp
Otu415	0	7	22	7	0	2	0	1	0	3	Fungi;Ascomycota;Leotiomycetes;Helotiales
Otu414	18	0	0	4	3	78	8	10	0	8	Fungi;Basidiomycota;Agaricomycetes;Agaricales;Cortinariaceae;Cortinarius;Cortinarius_sertipes
Otu413	0	0	0	0	15	0	0	1	0	23	Fungi;Basidiomycota;Agaricomycetes;Thelephorales;Thelephoraceae;Tomentella;Tomentella_cinereoumbrina
Otu412	0	2	0	0	1	2	61	20	35	0	Fungi;Basidiomycota;Agaricomycetes;Russulales;Russulaceae;Lactarius;Lactarius_pyrogalus
Otu411	0	0	23	0	0	0	9	0	0	0	Fungi;Ascomycota;Incertae_sedis;Incertae_sedis;Incertae_sedis;Polyscytalum;Polyscytalum_sp
Otu410	0	0	0	0	0	0	0	4	25	0	Fungi;Basidiomycota;Agaricomycetes;Agaricales;Cortinariaceae;Cortinarius
Otu419	4	40	49	1	43	1	5	0	39	0	Fungi;Basidiomycota;Agaricomycetes;Agaricales
Otu418	1	0	0	0	0	14	21	5	1	0	Fungi;Zygomycota;Incertae_sedis;Mortierellales;Mortierellaceae;Mortierella
Otu1138	0	0	0	0	0	0	0	0	4	0	Fungi
Otu1139	0	0	0	5	0	0	0	0	0	0	Fungi;Ascomycota;Eurotiomycetes;Chaetothyriales;Herpotrichiellaceae;Exophiala
Otu1136	0	0	0	0	0	0	0	6	0	0	Fungi;Ascomycota;Dothideomycetes;Pleosporales;Pleosporaceae
Otu1137	0	6	0	0	0	0	0	0	0	0	Fungi;Basidiomycota
Otu1134	0	0	4	6	1	0	0	0	0	0	Fungi;Ascomycota;Leotiomycetes;Helotiales;Hyaloscyphaceae;Lachnum;Lachnum_fuscescens_var._fuscescens
Otu1135	0	0	0	0	0	0	0	5	0	0	Fungi;Basidiomycota
Otu1132	0	0	4	0	0	0	0	0	0	0	Fungi;Basidiomycota
Otu1133	0	0	4	0	0	0	0	0	0	0	Fungi;Ascomycota;Sordariomycetes;Xylariales;Xylariaceae
Otu1130	0	0	0	0	0	0	0	6	0	0	Fungi;Basidiomycota;Agaricomycetes;Thelephorales;Thelephoraceae;Tomentella;Tomentella_sp_OTU211
Otu1131	0	0	0	0	0	0	0	5	0	0	Fungi;Basidiomycota
Otu899	0	0	0	0	0	0	0	0	6	0	Fungi;Basidiomycota
Otu898	0	10	0	0	0	0	0	0	0	0	Fungi;Ascomycota;Dothideomycetes;Pleosporales;Sporormiaceae;Preussia
Otu679	2	0	0	0	0	15	0	0	0	0	Fungi;Basidiomycota;Agaricomycetes;Thelephorales;Thelephoraceae;Tomentella;Tomentella_sp_OTU208
Otu678	4	4	4	1	0	5	0	0	0	10	Fungi;Ascomycota;Incertae_sedis;Incertae_sedis;Incertae_sedis;Cordana
Otu677	2	0	0	1	0	8	0	15	0	0	Fungi;Basidiomycota;Agaricomycetes;Russulales;Russulaceae;Lactarius;Lactarius_vietus
Otu676	0	9	0	0	0	3	0	0	0	0	Fungi;Ascomycota
Otu675	0	9	0	0	0	0	0	0	0	1	Fungi;Basidiomycota;Microbotryomycetes;Sporidiobolales;Incertae_sedis
Otu674	1	3	1	2	0	10	0	4	1	2	Fungi
Otu673	0	0	15	0	0	0	0	0	0	0	Fungi
Otu672	0	12	0	0	0	0	6	0	0	0	Fungi;Ascomycota
Otu895	0	0	0	0	0	0	0	3	0	8	Fungi;Basidiomycota;Agaricomycetes;Agaricales;Pluteaceae;Pluteus;Pluteus_chrysophlebius
Otu670	0	0	0	0	0	1	9	3	0	9	Fungi;Basidiomycota;Agaricomycetes;Sebacinales;Sebacinaceae;Sebacina;Sebacina_sp
Otu389	0	5	0	23	2	0	0	0	0	0	Fungi;Ascomycota;Eurotiomycetes;Eurotiales;Trichocomaceae;Penicillium;Penicillium_sp_0410ARD6F_2
Otu388	0	0	0	0	0	0	22	0	0	0	Fungi;Basidiomycota;Agaricomycetes;Agaricales;Amanitaceae;Amanita;Amanita_groenlandica
Otu387	0	0	0	5	0	30	0	4	0	0	Fungi;Chytridiomycota;Chytridiomycetes
Otu386	0	0	0	0	0	3	0	0	0	37	Fungi;Basidiomycota;Agaricomycetes;Agaricales;Cortinariaceae;Cortinarius
Otu385	0	0	0	0	0	0	0	28	0	0	Fungi;Ascomycota;Leotiomycetes;Helotiales;Unclassified;Unclassified;Helotiales_sp
Otu384	1	0	0	0	0	7	27	12	12	3	Fungi;Basidiomycota;Agaricomycetes;Sebacinales;Sebacinaceae;Sebacina;Sebacina_epigaea
Otu383	2	19	0	3	1	19	0	28	0	0	Fungi;Zygomycota;Incertae_sedis;Mortierellales;Mortierellaceae;Mortierella
Otu382	0	3	14	0	0	5	15	36	12	3	Fungi;Ascomycota;Dothideomycetes;Pleosporales;Incertae_sedis;Paraphoma;Paraphoma_sp
Otu381	2	1	3	8	0	4	0	3	0	41	Fungi;Basidiomycota;Agaricomycetes;Agaricales;Psathyrellaceae;Coprinellus;Coprinellus_angulatus
Otu380	4	16	5	24	30	2	0	0	7	3	Fungi;Ascomycota;Sordariomycetes;Hypocreales;Nectriaceae;Fusarium;Fusarium_sp_Po13
Otu251	2	7	0	11	2	33	36	10	48	59	Fungi;Basidiomycota
Otu250	3	8	60	11	7	0	0	5	4	0	Fungi;Ascomycota;Sordariomycetes;Hypocreales;Bionectriaceae;Unclassified;Bionectriaceae_sp
Otu253	6	0	51	4	0	51	47	2	4	0	Fungi;Basidiomycota;Agaricomycetes;Cantharellales;Hydnaceae;Hydnum;Hydnum_rufescens
Otu252	7	13	4	5	2	14	0	12	64	17	Fungi;Basidiomycota;Agaricomycetes;Sebacinales;Sebacinaceae;Sebacina;Sebacina_sp
Otu255	5	8	7	0	10	0	0	29	69	0	Fungi;Basidiomycota;Agaricomycetes;Agaricales;Mycenaceae;Hemimycena;Hemimycena_cucullata
Otu254	0	47	0	0	0	0	0	0	6	0	Fungi;Ascomycota
Otu257	216	0	0	0	32	24	44	26	25	27	Fungi;Basidiomycota;Agaricomycetes
Otu256	19	88	114	40	19	18	9	73	30	76	Fungi;Basidiomycota;Agaricomycetes;Polyporales;Ganodermataceae;Ganoderma;Ganoderma_applanatum
Otu259	2	4	35	48	12	5	1	18	13	8	Fungi
Otu258	2	0	0	0	0	45	53	24	3	0	Fungi;Basidiomycota;Agaricomycetes;Agaricales;Inocybaceae;Inocybe
Otu709	8	0	0	0	0	1	1	0	4	11	Fungi;Basidiomycota
Otu708	1	16	2	0	0	0	0	0	0	0	Fungi;Basidiomycota;Agaricomycetes
Otu1860	0	0	0	0	0	0	0	3	0	0	Fungi
Otu1861	0	0	3	0	0	0	0	0	0	0	Fungi
Otu1862	15	92	2	0	74	8	17	13	21	15	Fungi;Zygomycota;Incertae_sedis;Mortierellales;Mortierellaceae;Mortierella
Otu1863	0	4	4	0	4	2	0	0	0	0	Fungi;Basidiomycota
Otu1864	0	0	0	0	0	0	0	0	6	0	Fungi;Ascomycota;Orbiliomycetes;Unclassified;Unclassified;Unclassified;Orbiliomycetes_sp
Otu1865	0	0	2	0	1	1	4	3	3	1	Fungi
Otu1866	0	0	0	3	0	0	0	0	0	0	Fungi;Ascomycota;Saccharomycetes;Saccharomycetales;Dipodascaceae;Basidioascus
Otu1867	0	0	0	0	2	0	0	0	0	0	Fungi;Basidiomycota;Tremellomycetes;Tremellales;Incertae_sedis;Derxomyces
Otu1868	0	0	0	0	0	0	0	0	0	2	Fungi;Ascomycota;Pezizomycetes;Pezizales;Pezizaceae;Peziza;Peziza_infossa
Otu1869	0	0	0	0	2	0	0	0	0	0	Fungi;Ascomycota;Sordariomycetes;Hypocreales;Bionectriaceae;Clonostachys;Clonostachys_sp
Otu875	0	9	0	0	0	0	0	0	0	0	Fungi;Ascomycota;Sordariomycetes;Chaetosphaeriales;Chaetosphaeriaceae;Chaetosphaeria;Chaetosphaeria_sp_KRCF710
Otu874	0	6	0	0	0	0	0	0	0	0	Fungi;Ascomycota;Dothideomycetes;Capnodiales;Capnodiaceae;Capnodium;Capnodium_sp
Otu877	0	0	0	0	4	0	0	2	0	6	Fungi;Ascomycota;Sordariomycetes;Sordariales;Lasiosphaeriaceae;Podospora;Podospora_fabiformis
Otu876	0	5	2	0	0	0	0	0	0	9	Fungi;Basidiomycota;Agaricomycetes;Agaricales;Agaricaceae;Lepiota;Lepiota_erminea
Otu871	2	8	5	0	9	0	0	0	0	0	Fungi;Ascomycota;Leotiomycetes
Otu870	0	0	0	0	0	0	0	0	8	1	Fungi
Otu873	0	0	6	0	0	0	0	0	0	0	Fungi;Ascomycota;Leotiomycetes;Helotiales;Incertae_sedis;Scytalidium;Scytalidium_lignicola
Otu872	8	5	12	4	12	0	0	0	6	0	Fungi;Ascomycota
Otu879	0	0	0	0	0	0	0	6	0	0	Fungi;Basidiomycota;Agaricomycetes;Agaricales;Schizophyllaceae;Schizophyllum;Schizophyllum_commune
Otu878	0	7	1	0	4	0	0	0	0	0	Fungi;Ascomycota;Leotiomycetes;Helotiales;Incertae_sedis;Scleropezicula;Scleropezicula_sp
Otu1608	0	0	0	0	3	0	0	0	0	0	Fungi;Basidiomycota;Agaricomycetes;Russulales;Russulaceae;Russula
Otu1609	0	0	0	0	0	0	0	0	0	2	Fungi;Ascomycota;Eurotiomycetes;Chaetothyriales;Herpotrichiellaceae;Capronia;Capronia_sp_MUCL_39978
Otu1600	0	1	0	0	3	1	4	1	2	0	Fungi;Ascomycota;Archaeorhizomycetes;Archaeorhizomycetales;Archaeorhizomycetaceae;Archaeorhizomyces;Archaeorhizomyces_finlayi
Otu1601	0	0	0	0	0	0	0	1	3	0	Fungi
Otu1602	1	0	2	0	0	0	0	0	0	0	Fungi;Zygomycota;Incertae_sedis;Mortierellales;Mortierellaceae;Mortierella
Otu1603	2	0	0	0	0	0	0	1	0	2	Fungi;Basidiomycota
Otu1604	0	0	0	0	0	0	0	0	3	0	Fungi;Basidiomycota;Agaricomycetes
Otu1605	0	0	0	0	0	0	0	0	2	0	Fungi;Ascomycota;Leotiomycetes;Thelebolales;Thelebolaceae;Thelebolus;Thelebolus_globosus
Otu1606	2	2	0	0	0	0	0	0	0	0	Fungi
Otu1607	0	0	0	4	0	0	0	0	0	0	Fungi;Basidiomycota;Agaricomycetes;Agaricales;Tricholomataceae;Lepista;Lepista_luscina
Otu549	0	0	0	0	0	0	0	14	0	0	Fungi;Ascomycota
Otu548	10	0	0	20	0	9	0	0	0	8	Fungi;Basidiomycota;Agaricomycetes;Agaricales;Inocybaceae;Inocybe
Otu1734	0	2	0	0	0	1	0	2	0	0	Fungi
Otu1735	0	0	0	0	0	0	0	0	0	2	Fungi;Basidiomycota
Otu1736	0	0	3	0	0	0	0	1	0	0	Fungi;Basidiomycota;Agaricomycetes;Gomphales;Gomphaceae;Ramaria;Ramaria_abietina
Otu1737	0	0	0	0	0	0	0	0	0	2	Fungi;Ascomycota;Sordariomycetes;Microascales;Halosphaeriaceae;Unclassified;Halosphaeriaceae_sp
Otu1730	2	0	0	0	0	0	0	0	0	0	Fungi;Ascomycota;Dothideomycetes;Pleosporales
Otu1731	0	1	0	0	0	0	3	0	0	0	Fungi
Otu1732	0	0	0	0	0	0	0	2	0	0	Fungi
Otu1733	1	3	1	0	0	0	0	0	0	0	Fungi;Ascomycota;Dothideomycetes;Pleosporales
Otu541	0	0	0	0	0	0	0	0	14	0	Fungi;Basidiomycota;Agaricomycetes;Sebacinales;Sebacinaceae
Otu1738	0	0	0	0	0	0	0	2	0	0	Fungi;Ascomycota;Leotiomycetes;Geoglossales;Geoglossaceae;Geoglossum;Geoglossum_umbratile
Otu1739	9	0	0	0	0	0	0	0	0	0	Fungi;Basidiomycota;Agaricomycetes;Russulales;Stephanosporaceae;Cristinia;Cristinia_helvetica
Otu540	0	10	13	0	0	0	0	0	0	0	Fungi;Ascomycota;Leotiomycetes;Helotiales;Helotiaceae;Hymenoscyphus;Hymenoscyphus_caudatus
Otu941	0	0	0	0	1	0	0	0	6	0	Fungi;Basidiomycota;Agaricomycetes;Auriculariales;Unclassified;Unclassified;Auriculariales_sp
Otu940	9	5	0	0	2	0	0	2	0	1	Fungi;Ascomycota;Sordariomycetes
Otu767	0	1	2	0	0	0	0	0	7	0	Fungi;Ascomycota
Otu942	1	3	5	0	0	0	0	0	0	0	Fungi;Ascomycota
Otu761	2	14	13	6	0	9	2	3	1	0	Fungi
Otu944	0	0	0	0	0	0	6	0	0	0	Fungi
Otu1459	0	0	2	3	0	0	0	0	0	0	Fungi;Ascomycota;Dothideomycetes;Pleosporales;Lophiostomataceae;Lophiostoma;Lophiostoma_semiliberum
Otu1458	1	4	0	0	0	3	0	0	0	0	Fungi;Ascomycota
Otu763	0	0	2	0	8	0	0	0	0	0	Fungi;Ascomycota;Sordariomycetes;Xylariales;Amphisphaeriaceae;Unclassified;Amphisphaeriaceae_sp
Otu1451	0	4	1	0	1	0	0	0	0	1	Fungi;Basidiomycota;Tremellomycetes;Filobasidiales;Filobasidiaceae;Cryptococcus;Cryptococcus_sp
Otu1450	0	0	0	4	0	0	0	0	0	2	Fungi
Otu1453	0	0	3	2	0	1	0	0	3	1	Fungi;Basidiomycota
Otu762	0	0	4	3	3	0	0	10	0	5	Fungi;Ascomycota;Leotiomycetes;Helotiales
Otu1455	0	4	0	0	1	0	0	0	0	0	Fungi;Ascomycota;Sordariomycetes;Xylariales;Diatrypaceae;Unclassified;Diatrypaceae_sp
Otu1454	0	4	2	4	1	0	0	0	0	0	Fungi;Ascomycota;Eurotiomycetes;Chaetothyriales;Herpotrichiellaceae;Exophiala;Exophiala_brunnea
Otu1457	2	0	0	0	0	4	0	0	0	0	Fungi;Basidiomycota;Agaricomycetes;Agaricales;Psathyrellaceae;Psathyrella;Psathyrella_candolleana
Otu1456	0	0	0	0	0	0	3	3	5	0	Fungi;Basidiomycota
Otu462	0	1	2	0	0	6	0	9	0	22	Fungi;Basidiomycota;Agaricomycetes;Agaricales;Inocybaceae;Inocybe;Inocybe_jacobi
Otu463	0	6	12	18	2	0	0	7	0	0	Fungi;Basidiomycota;Tremellomycetes;Filobasidiales;Filobasidiaceae
Otu460	0	0	18	0	0	0	0	0	0	0	Fungi;Ascomycota;Leotiomycetes;Helotiales
Otu461	14	4	12	9	0	20	30	7	15	0	Fungi;Basidiomycota;Agaricomycetes;Thelephorales;Thelephoraceae;Tomentella;Tomentella_sp
Otu466	11	23	6	5	8	0	2	7	0	2	Fungi;Ascomycota;Eurotiomycetes;Eurotiales;Trichocomaceae;Paecilomyces;Paecilomyces_marquandii
Otu467	0	0	0	0	0	0	0	20	0	0	Fungi;Basidiomycota;Agaricomycetes;Agaricales;Cortinariaceae;Cortinarius
Otu464	17	0	2	4	0	4	28	15	18	0	Fungi;Zygomycota;Incertae_sedis;Mucorales;Umbelopsidaceae;Umbelopsis;Umbelopsis_sp_Um_068
Otu465	0	0	0	0	0	0	0	0	16	0	Fungi;Ascomycota;Sordariomycetes;Xylariales
Otu468	0	0	20	0	0	0	0	0	0	0	Fungi;Basidiomycota;Agaricomycetes;Cantharellales;Ceratobasidiaceae;Ceratobasidium;Ceratobasidium_sp_EE_2011
Otu469	1	7	0	0	0	6	0	0	17	0	Fungi;Ascomycota;Leotiomycetes;Helotiales;Incertae_sedis;Leptodontidium;Leptodontidium_sp
Otu1149	0	0	6	4	0	0	0	0	0	0	Fungi;Ascomycota;Sordariomycetes;Hypocreales
Otu1148	0	0	0	0	4	0	0	0	0	0	Fungi
Otu1143	0	0	0	0	0	0	0	0	0	13	Fungi;Basidiomycota;Agaricomycetes;Agaricales;Bolbitiaceae;Conocybe;Conocybe_cylindracea
Otu1142	0	1	8	0	0	0	0	0	0	0	Fungi;Ascomycota;Dothideomycetes;Pleosporales
Otu1141	0	0	0	0	0	0	4	0	0	0	Fungi;Ascomycota;Dothideomycetes
Otu1140	0	0	0	0	0	0	0	0	4	0	Fungi;Ascomycota;Pezizomycetes;Pezizales;Pyronemataceae;Sphaerosporella;Sphaerosporella_sp
Otu1147	0	0	0	0	0	3	0	0	5	0	Fungi
Otu1146	0	0	2	4	4	0	1	0	0	0	Fungi;Ascomycota;Eurotiomycetes;Chaetothyriales;Herpotrichiellaceae;Exophiala;Exophiala_moniliae
Otu1145	0	5	0	0	0	0	0	0	0	0	Fungi;Ascomycota;Dothideomycetes;Pleosporales
Otu1144	0	0	0	0	4	0	0	0	0	0	Fungi;Basidiomycota
Otu608	0	3	4	0	0	0	0	1	17	0	Fungi;Ascomycota;Dothideomycetes;Pleosporales;Lophiostomataceae;Lophiostoma;Lophiostoma_semiliberum
Otu609	11	7	24	7	10	0	5	0	0	1	Fungi;Ascomycota;Sordariomycetes;Hypocreales;Clavicipitaceae;Pochonia;Pochonia_bulbillosa
Otu602	16	0	0	14	10	0	0	0	0	0	Fungi;Ascomycota
Otu603	5	13	3	5	8	2	4	4	0	12	Fungi;Ascomycota;Eurotiomycetes;Chaetothyriales;Herpotrichiellaceae;Cladophialophora
Otu600	0	0	11	0	0	0	0	0	0	0	Fungi;Basidiomycota;Agaricomycetes;Agaricales
Otu601	0	13	0	0	0	0	0	0	0	0	Fungi;Ascomycota;Sordariomycetes;Xylariales;Amphisphaeriaceae;Unclassified;Amphisphaeriaceae_sp
Otu606	0	2	5	5	0	0	0	11	0	0	Fungi
Otu607	0	8	3	2	18	0	0	6	0	4	Fungi;Ascomycota;Dothideomycetes;Pleosporales;Incertae_sedis;Paraphoma;Paraphoma_sp
Otu604	0	2	0	0	10	0	0	0	0	0	Fungi;Ascomycota;Dothideomycetes;Pleosporales;Lophiostomataceae;Lophiostoma;Lophiostoma_cynaroidis
Otu605	0	1	10	7	0	0	0	6	1	0	Fungi;Ascomycota;Dothideomycetes;Pleosporales;Incertae_sedis;Periconia;Periconia_sp
Otu268	3	0	0	4	67	0	2	2	0	0	Fungi;Basidiomycota;Agaricomycetes;Cantharellales;Ceratobasidiaceae
Otu269	12	16	6	0	2	164	59	50	106	2	Fungi;Basidiomycota;Agaricomycetes;Russulales;Russulaceae;Russula
Otu264	0	0	0	0	0	1	2	2	64	0	Fungi;Basidiomycota;Agaricomycetes;Thelephorales;Thelephoraceae
Otu265	22	87	86	61	138	2	15	5	67	6	Fungi;Ascomycota;Incertae_sedis;Incertae_sedis;Incertae_sedis;Collembolispora;Collembolispora_barbata
Otu266	2	35	19	55	5	7	10	27	10	2	Fungi;Basidiomycota
Otu267	2	15	59	0	41	15	0	7	0	26	Fungi;Ascomycota;Sordariomycetes;Xylariales
Otu260	0	0	0	0	0	0	81	14	7	0	Fungi;Basidiomycota;Agaricomycetes;Cantharellales;Clavulinaceae;Clavulina;Clavulina_sp
Otu261	1	25	118	95	5	26	2	14	90	10	Fungi;Basidiomycota;Agaricomycetes;Phallales;Phallaceae;Phallus;Phallus_impudicus
Otu262	0	31	18	21	7	67	3	25	0	1	Fungi;Ascomycota;Dothideomycetes;Venturiales;Unclassified;Unclassified;Venturiales_sp
Otu263	0	0	0	0	0	0	3	0	50	0	Fungi;Zygomycota;Incertae_sedis;Mortierellales;Mortierellaceae;Mortierella
Otu116	26	14	0	0	1	35	0	113	144	0	Fungi;Zygomycota;Incertae_sedis;Mortierellales;Mortierellaceae;Mortierella
Otu117	183	17	2	2	17	2	5	0	11	3	Fungi;Basidiomycota;Agaricomycetes;Thelephorales;Thelephoraceae;Tomentella;Tomentella_sp_src857
Otu114	120	3	0	0	70	142	166	14	87	0	Fungi;Basidiomycota;Agaricomycetes;Russulales;Russulaceae;Russula
Otu115	4	0	3	32	1	0	326	1	208	82	Fungi;Basidiomycota;Agaricomycetes;Agaricales;Entolomataceae;Entoloma
Otu112	8	133	10	11	334	36	6	7	11	145	Fungi;Basidiomycota;Agaricomycetes;Agaricales;Cortinariaceae;Cortinarius;Cortinarius_anomalus
Otu113	34	0	0	0	31	0	0	0	0	171	Fungi;Basidiomycota;Agaricomycetes;Cantharellales;Ceratobasidiaceae;Unclassified;Ceratobasidiaceae_sp
Otu110	0	0	0	0	0	5	2	596	0	0	Fungi;Basidiomycota;Agaricomycetes;Agaricales;Tricholomataceae;Infundibulicybe;Infundibulicybe_gibba
Otu111	26	121	158	76	79	22	9	24	0	24	Fungi;Ascomycota;Dothideomycetes;Capnodiales;Davidiellaceae;Cladosporium;Cladosporium_sp_agrAR069
Otu1855	0	0	0	0	0	0	2	0	0	0	Fungi;Basidiomycota;Agaricomycetes;Cantharellales;Hydnaceae;Sistotrema;Sistotrema_sp
Otu1854	0	2	0	0	2	0	0	0	0	0	Fungi;Ascomycota;Leotiomycetes
Otu1857	0	0	0	0	0	0	0	0	3	0	Fungi;Basidiomycota;Agaricomycetes;Cantharellales;Ceratobasidiaceae;Thanatephorus
Otu1856	0	0	0	0	1	6	0	0	0	0	Fungi;Basidiomycota
Otu1851	1	0	0	3	0	0	0	0	0	0	Fungi;Basidiomycota;Agaricomycetes;Polyporales;Phanerochaetaceae;Phanerochaete;Phanerochaete_affinis
Otu1850	0	0	0	0	0	3	0	0	0	0	Fungi;Ascomycota;Pezizomycetes;Pezizales;Pezizaceae;Pachyphloeus;Pachyphloeus_marroninus
Otu118	2	1	0	0	0	14	66	128	143	99	Fungi;Basidiomycota;Agaricomycetes;Sebacinales;Sebacinaceae;Sebacina;Sebacina_sp
Otu119	33	438	311	105	97	2	3	5	1	3	Fungi;Ascomycota;Incertae_sedis;Incertae_sedis;Incertae_sedis;Polyscytalum;Polyscytalum_pustulans
Otu286	0	31	13	2	15	69	144	175	137	44	Fungi
Otu287	0	44	15	3	8	1	2	17	25	0	Fungi;Ascomycota;Leotiomycetes;Helotiales;Incertae_sedis;Leptodontidium
Otu284	40	0	0	0	15	0	0	3	0	12	Fungi;Ascomycota;Sordariomycetes;Incertae_sedis;Glomerellaceae;Colletotrichum
Otu285	2	1	25	9	5	4	1	49	0	0	Fungi;Zygomycota;Incertae_sedis;Mucorales;Umbelopsidaceae;Umbelopsis;Umbelopsis_ramanniana
Otu282	0	0	0	0	0	0	99	0	0	0	Fungi;Basidiomycota;Agaricomycetes;Russulales;Russulaceae;Russula
Otu283	21	43	29	3	1	9	38	7	1	7	Fungi;Ascomycota;Sordariomycetes;Hypocreales;Ophiocordycipitaceae;Elaphocordyceps;Elaphocordyceps_subsessilis
Otu280	0	0	0	0	0	51	40	0	0	55	Fungi;Basidiomycota;Agaricomycetes;Sebacinales;Sebacinaceae;Sebacina;Sebacina_epigaea
Otu281	1	0	0	0	0	16	68	21	18	0	Fungi;Basidiomycota;Agaricomycetes;Agaricales;Amanitaceae;Amanita;Amanita_lividopallescens
Otu288	19	0	6	0	0	41	0	0	7	4	Fungi;Basidiomycota;Agaricomycetes;Agaricales;Cortinariaceae;Cortinarius
Otu289	67	0	4	8	33	2	8	4	0	2	Fungi;Basidiomycota;Agaricomycetes;Thelephorales;Thelephoraceae;Tomentella
Otu1859	0	0	0	0	0	0	0	2	0	0	Fungi
Otu1858	0	2	0	1	0	0	0	0	0	0	Fungi;Basidiomycota;Agaricomycetes;Agaricales;Entolomataceae;Entoloma
Otu840	4	0	0	0	0	0	6	0	7	0	Fungi;Basidiomycota;Agaricomycetes;Thelephorales;Thelephoraceae;Tomentella;Tomentella_sp
Otu841	0	1	7	3	0	0	0	0	0	0	Fungi;Ascomycota;Sordariomycetes;Sordariales;Chaetomiaceae
Otu842	5	0	6	0	0	0	0	0	0	0	Fungi;Basidiomycota
Otu843	0	6	9	0	7	0	0	0	0	0	Fungi;Ascomycota;Eurotiomycetes;Chaetothyriales;Herpotrichiellaceae;Rhinocladiella;Rhinocladiella_sp
Otu844	0	0	0	1	0	0	0	0	0	8	Fungi
Otu845	0	0	7	0	3	0	0	0	0	0	Fungi
Otu846	0	0	0	4	0	1	4	0	11	4	Fungi
Otu847	0	1	8	1	2	2	0	0	0	5	Fungi;Ascomycota;Sordariomycetes;Xylariales;Xylariaceae;Biscogniauxia;Biscogniauxia_mediterranea
Otu848	0	0	0	0	0	0	0	6	0	0	Fungi;Basidiomycota
Otu849	1	14	6	1	2	27	25	8	9	7	Fungi;Zygomycota;Incertae_sedis;Kickxellales;Kickxellaceae;Ramicandelaber
Otu1635	0	0	0	0	0	0	0	0	2	0	Fungi
Otu1583	0	0	2	0	0	0	0	0	0	0	Fungi;Ascomycota;Dothideomycetes;Pleosporales;Lophiostomataceae;Lophiostoma;Lophiostoma_cynaroidis
Otu1637	0	0	0	0	0	3	0	0	0	0	Fungi;Chytridiomycota;Chytridiomycetes;Spizellomycetales;Spizellomycetaceae
Otu1636	0	0	2	0	0	1	0	0	0	0	Fungi;Ascomycota;Leotiomycetes;Helotiales
Otu1631	0	0	0	0	0	0	0	4	0	1	Fungi
Otu1630	0	0	0	0	0	0	0	3	0	0	Fungi;Ascomycota;Dothideomycetes;Venturiales;Venturiaceae;Unclassified;Venturiaceae_sp
Otu1633	0	0	0	0	0	0	2	0	0	0	Fungi;Basidiomycota;Agaricomycetes;Agaricales;Amanitaceae;Amanita;Amanita_vaginata
Otu1582	1	0	3	0	0	2	0	0	0	0	Fungi
Otu1852	0	0	0	0	0	0	0	0	0	2	Fungi;Basidiomycota;Agaricomycetes;Agaricales;Agaricaceae;Lepiota;Lepiota_clypeolaria
Otu1639	0	0	0	2	0	0	0	2	0	0	Fungi
Otu1581	0	0	0	0	0	0	0	2	0	0	Fungi;Ascomycota;Sordariomycetes;Hypocreales
Otu1580	0	0	0	0	0	0	0	0	2	0	Fungi;Basidiomycota
Otu1587	0	2	0	0	0	0	0	0	0	0	Fungi;Basidiomycota;Agaricostilbomycetes;Agaricostilbales;Agaricostilbaceae;Bensingtonia;Bensingtonia_miscanthi
Otu1586	0	6	0	0	0	5	0	0	0	3	Fungi;Basidiomycota;Agaricomycetes;Sebacinales;Sebacinaceae;Sebacina;Sebacina_sp
Otu1585	0	0	2	0	2	0	0	0	0	0	Fungi;Basidiomycota;Microbotryomycetes
Otu1584	0	0	0	0	6	0	6	0	0	0	Fungi;Ascomycota;Leotiomycetes;Helotiales;Hyaloscyphaceae;Mycoarthris;Mycoarthris_corallina
Otu420	46	38	1	3	0	1	60	5	0	16	Fungi;Basidiomycota;Agaricomycetes;Agaricales;Entolomataceae;Entoloma;Entoloma_sordidulum
Otu1701	0	0	0	0	0	0	2	0	0	0	Fungi;Basidiomycota;Agaricomycetes
Otu1700	0	0	0	0	0	2	0	0	0	0	Fungi;Basidiomycota;Agaricomycetes;Agaricales
Otu1703	0	0	2	0	2	0	0	0	0	2	Fungi;Ascomycota;Dothideomycetes;Pleosporales;Incertae_sedis;Phoma
Otu1702	0	4	0	0	0	0	0	0	0	0	Fungi;Basidiomycota;Agaricomycetes;Agaricales
Otu1705	0	0	0	0	0	0	0	0	0	3	Fungi;Ascomycota;Dothideomycetes;Pleosporales;Massarinaceae;Saccharicola;Saccharicola_sp
Otu1704	5	0	0	0	0	0	0	0	0	0	Fungi;Basidiomycota;Agaricomycetes;Agaricales;Marasmiaceae;Marasmiellus;Marasmiellus_paspali
Otu1707	0	3	0	0	0	0	0	0	0	0	Fungi;Ascomycota;Leotiomycetes;Rhytismatales;Rhytismataceae
Otu1706	0	0	0	2	0	0	0	0	0	0	Fungi;Ascomycota
Otu1709	0	0	0	0	0	2	0	0	0	0	Fungi;Ascomycota;Incertae_sedis;Incertae_sedis;Incertae_sedis;Polyscytalum;Polyscytalum_sp
Otu1708	0	0	0	0	0	0	1	2	0	0	Fungi
Otu706	0	0	3	0	0	0	0	7	8	0	Fungi;Ascomycota
Otu1446	0	3	1	0	7	0	0	4	0	3	Fungi;Basidiomycota;Agaricomycetes;Agaricales;Psathyrellaceae;Coprinellus;Coprinellus_sp_CBM_FB_33076
Otu1447	0	0	0	3	0	0	0	0	0	0	Fungi;Ascomycota;Leotiomycetes;Helotiales
Otu1444	0	1	0	0	3	0	0	0	0	0	Fungi;Ascomycota;Sordariomycetes;Xylariales;Xylariaceae;Xylaria;Xylaria_sp_7061021
Otu1445	0	4	0	0	0	0	0	0	0	0	Fungi
Otu1442	0	3	0	0	0	0	0	0	0	2	Fungi;Ascomycota;Sordariomycetes;Xylariales;Xylariaceae;Xylaria;Xylaria_longipes
Otu1443	0	0	0	0	0	0	0	0	0	4	Fungi;Basidiomycota;Agaricomycetes;Agaricales;Cortinariaceae;Cortinarius
Otu1440	0	0	0	0	4	0	0	0	0	0	Fungi;Ascomycota;Sordariomycetes;Xylariales
Otu1441	0	3	1	0	0	2	0	0	3	2	Fungi;Basidiomycota
Otu1448	0	3	0	0	0	0	3	0	0	0	Fungi;Ascomycota;Taphrinomycetes;Taphrinales;Taphrinaceae;Lalaria;Lalaria_inositophila
Otu1449	0	0	0	0	0	0	0	3	0	0	Fungi;Basidiomycota;Microbotryomycetes;Sporidiobolales;Incertae_sedis;Sporobolomyces;Sporobolomyces_falcatus
Otu538	0	14	0	0	0	0	1	0	0	0	Fungi;Ascomycota;Dothideomycetes;Incertae_sedis
Otu539	1	0	5	2	2	0	5	2	0	15	Fungi
Otu530	0	0	0	0	2	16	0	0	0	0	Fungi;Ascomycota
Otu531	2	15	0	11	4	1	0	0	0	0	Fungi;Ascomycota;Leotiomycetes
Otu471	0	2	6	18	2	0	0	2	0	0	Fungi;Basidiomycota
Otu470	2	20	13	0	14	6	0	5	0	3	Fungi;Ascomycota;Leotiomycetes
Otu473	0	5	21	0	0	4	1	0	0	0	Fungi;Chytridiomycota;Chytridiomycetes;Spizellomycetales;Spizellomycetaceae
Otu472	0	6	2	12	7	4	2	8	21	1	Fungi;Zygomycota;Incertae_sedis;Mucorales;Umbelopsidaceae;Umbelopsis;Umbelopsis_sp
Otu475	0	0	0	16	0	0	0	0	0	0	Fungi;Basidiomycota;Microbotryomycetes;Sporidiobolales;Incertae_sedis;Rhodosporidium;Rhodosporidium_diobovatum
Otu474	2	0	0	0	0	0	0	0	0	16	Fungi;Ascomycota;Dothideomycetes;Pleosporales;Sporormiaceae;Preussia;Preussia_pilosella
Otu477	3	16	19	1	50	1	0	4	0	5	Fungi;Basidiomycota;Agaricomycetes;Thelephorales;Thelephoraceae;Unclassified;Thelephoraceae_sp
Otu476	0	4	0	6	1	16	0	41	0	9	Fungi;Basidiomycota;Agaricomycetes;Agaricales;Tricholomataceae;Lepista;Lepista_glaucocana
Otu479	0	26	9	0	10	0	0	4	0	0	Fungi;Ascomycota;Dothideomycetes;Capnodiales;Teratosphaeriaceae;Devriesia;Devriesia_sp
Otu478	0	8	6	6	1	0	0	4	23	0	Fungi;Ascomycota;Sordariomycetes;Chaetosphaeriales;Chaetosphaeriaceae;Chloridium;Chloridium_virescens_var_chlamydosporum
Otu1158	0	3	0	0	0	8	0	0	0	0	Fungi;Ascomycota;Incertae_sedis;Incertae_sedis;Incertae_sedis;Xenochalara;Xenochalara_juniperi
Otu1159	0	5	4	7	0	0	0	0	0	0	Fungi;Ascomycota;Sordariomycetes;Sordariales
Otu1150	0	0	0	0	0	0	0	4	0	0	Fungi;Basidiomycota
Otu1151	0	0	0	0	0	0	2	14	0	4	Fungi
Otu1152	0	0	4	0	0	0	0	0	0	0	Fungi;Ascomycota;Eurotiomycetes;Chaetothyriales;Herpotrichiellaceae
Otu1153	0	0	0	0	0	0	0	5	0	0	Fungi;Basidiomycota
Otu1154	0	0	0	0	0	5	0	0	0	0	Fungi;Chytridiomycota;Chytridiomycetes
Otu1155	0	0	0	7	0	0	0	0	0	0	Fungi;Basidiomycota;Agaricomycetes;Cantharellales;Ceratobasidiaceae
Otu1156	0	0	0	0	0	0	0	2	4	0	Fungi
Otu1157	0	0	0	0	0	0	0	4	0	0	Fungi;Basidiomycota
Otu619	0	6	5	3	2	7	14	8	0	4	Fungi;Basidiomycota
Otu618	3	18	13	13	7	1	2	11	0	0	Fungi;Ascomycota;Sordariomycetes;Hypocreales;Incertae_sedis;Acremonium;Acremonium_sp_LB_2012
Otu611	0	8	15	1	3	0	0	0	0	0	Fungi;Ascomycota;Eurotiomycetes;Chaetothyriales;Herpotrichiellaceae;Exophiala
Otu610	0	0	0	0	11	23	0	0	0	0	Fungi;Basidiomycota;Agaricomycetes;Atheliales;Atheliaceae;Fibulorhizoctonia;Fibulorhizoctonia_sp
Otu613	0	2	3	0	0	1	11	14	1	2	Fungi;Basidiomycota
Otu612	0	14	3	12	0	0	3	0	5	0	Fungi;Ascomycota;Eurotiomycetes;Chaetothyriales;Herpotrichiellaceae;Cladophialophora
Otu615	1	19	1	0	0	8	0	4	0	15	Fungi;Ascomycota;Dothideomycetes;Venturiales;Venturiaceae;Unclassified;Venturiaceae_sp
Otu614	27	3	1	7	14	15	0	11	15	3	Fungi;Ascomycota;Dothideomycetes;Hysteriales;Gloniaceae;Cenococcum
Otu617	0	41	1	0	1	2	6	6	8	0	Fungi;Basidiomycota;Agaricomycetes;Boletales;Paxillaceae;Melanogaster;Melanogaster_broomeianus
Otu616	4	18	8	33	10	2	4	8	7	7	Fungi
Otu279	9	40	45	0	41	0	0	15	0	32	Fungi;Ascomycota;Dothideomycetes;Pleosporales
Otu278	11	12	13	52	31	0	5	0	4	0	Fungi;Basidiomycota;Agaricomycetes;Sebacinales;Sebacinaceae;Unclassified;uncultured_Sebacina
Otu273	0	0	0	0	0	0	117	1	0	0	Fungi;Basidiomycota;Agaricomycetes
Otu272	0	5	17	44	0	0	0	0	0	0	Fungi;Ascomycota;Dothideomycetes;Pleosporales;Pleosporaceae;Cochliobolus;Cochliobolus_sativus
Otu271	8	44	23	32	21	2	1	14	0	15	Fungi;Ascomycota;Leotiomycetes;Incertae_sedis;Incertae_sedis;Meliniomyces;Meliniomyces_sp
Otu270	11	46	7	4	13	18	0	2	3	36	Fungi;Ascomycota;Sordariomycetes;Hypocreales;Cordycipitaceae;Beauveria;Beauveria_bassiana
Otu277	32	0	2	7	3	39	39	47	9	55	Fungi;Basidiomycota;Agaricomycetes;Sebacinales;Sebacinaceae;Sebacina
Otu276	0	7	6	45	6	3	0	6	0	0	Fungi;Ascomycota;Sordariomycetes
Otu275	0	51	0	0	0	0	0	0	0	0	Fungi;Basidiomycota;Agaricomycetes;Trechisporales;Unclassified;Unclassified;Trechisporales_sp
Otu274	1	0	0	0	0	3	6	62	10	4	Fungi;Basidiomycota;Agaricomycetes;Sebacinales;Sebacinaceae
Otu105	0	0	5	0	0	0	0	385	0	0	Fungi;Basidiomycota;Agaricomycetes
Otu104	43	128	191	41	97	11	1	3	1	8	Fungi;Ascomycota;Sordariomycetes;Hypocreales;Hypocreaceae;Trichoderma
Otu107	0	4	0	0	159	0	1	0	0	0	Fungi;Ascomycota;Leotiomycetes;Helotiales;Sclerotiniaceae
Otu106	65	228	79	13	258	22	27	52	63	87	Fungi;Ascomycota;Leotiomycetes;Helotiales;Incertae_sedis;Tetracladium
Otu101	89	303	100	31	5	6	0	3	2	5	Fungi;Ascomycota;Sordariomycetes;Hypocreales;Nectriaceae;Nectria;Nectria_sp
Otu100	27	1	0	0	16	152	306	98	263	15	Fungi;Basidiomycota;Agaricomycetes;Agaricales;Inocybaceae;Inocybe;Inocybe_aff_nodulosa_PBM_2644
Otu103	145	4	0	7	18	227	15	9	50	43	Fungi;Basidiomycota;Agaricomycetes;Thelephorales;Thelephoraceae;Tomentella;Tomentella_cinereoumbrina
Otu102	8	12	27	3	35	1	0	5	0	217	Fungi;Basidiomycota;Agaricomycetes;Cantharellales;Ceratobasidiaceae;Unclassified;Ceratobasidiaceae_sp
Otu1842	0	0	0	0	0	0	2	0	0	0	Fungi;Ascomycota
Otu1843	0	2	1	0	2	0	0	0	0	1	Fungi
Otu1840	0	0	0	0	0	0	0	4	0	0	Fungi;Ascomycota;Eurotiomycetes;Chaetothyriales;Herpotrichiellaceae;Phaeomoniella
Otu1841	0	2	0	0	0	0	0	0	0	0	Fungi;Basidiomycota;Agaricomycetes;Agaricales
Otu109	60	250	217	62	3	17	21	1	8	13	Fungi;Ascomycota;Eurotiomycetes;Eurotiales
Otu108	7	86	79	3	7	20	113	15	169	6	Fungi;Basidiomycota;Agaricomycetes;Agaricales;Cortinariaceae;Cortinarius
Otu1844	0	0	2	0	0	0	0	0	0	0	Fungi;Ascomycota;Dothideomycetes;Pleosporales
Otu1845	0	0	0	0	0	4	0	0	1	0	Fungi;Basidiomycota
Otu295	41	0	0	0	0	36	0	0	0	1	Fungi;Zygomycota;Incertae_sedis;Mortierellales;Mortierellaceae
Otu294	0	2	0	0	0	0	1	161	14	0	Fungi;Basidiomycota;Agaricomycetes;Agaricales;Cortinariaceae;Cortinarius
Otu297	45	11	6	12	0	2	0	0	0	0	Fungi;Basidiomycota;Agaricomycetes;Thelephorales;Thelephoraceae;Tomentella;Tomentella_sp
Otu296	14	1	3	2	4	7	8	27	24	52	Fungi;Basidiomycota;Agaricomycetes;Cantharellales;Unclassified;Unclassified;Cantharellales_sp
Otu291	11	26	40	28	10	8	16	18	0	3	Fungi;Ascomycota;Sordariomycetes;Hypocreales;Bionectriaceae;Clonostachys;Clonostachys_rosea_f._catenulata
Otu290	0	0	0	0	0	18	42	10	29	0	Fungi
Otu293	0	0	0	0	0	5	73	92	50	20	Fungi;Basidiomycota;Agaricomycetes;Agaricales;Inocybaceae;Inocybe;Inocybe_rimosa
Otu292	0	0	1	0	2	7	0	0	0	43	Fungi;Basidiomycota;Agaricomycetes;Russulales;Russulaceae;Russula;Russula_olivobrunnea
Otu299	0	5	46	3	2	1	0	17	0	5	Fungi;Basidiomycota;Agaricomycetes;Sebacinales;Sebacinaceae;Sebacina;Sebacina_sp
Otu298	0	0	0	0	0	0	50	0	0	0	Fungi;Basidiomycota;Agaricomycetes;Agaricales;Cortinariaceae;Cortinarius;Cortinarius_colymbadinus
Otu325	11	117	58	37	52	2	0	9	0	13	Fungi;Ascomycota;Eurotiomycetes;Chaetothyriales;Herpotrichiellaceae;Cladophialophora;Cladophialophora_sp_olrim407
Otu324	0	5	0	0	29	3	0	0	0	0	Fungi;Ascomycota;Dothideomycetes;Pleosporales;Pleomassariaceae;Unclassified;Pleomassariaceae_sp
Otu327	15	8	3	0	4	41	11	5	41	33	Fungi;Basidiomycota;Agaricomycetes;Sebacinales;Sebacinaceae;Sebacina
Otu326	0	8	2	0	0	8	0	68	17	6	Fungi;Ascomycota;Sordariomycetes;Hypocreales;Nectriaceae;Fusicolla;Fusicolla_acetilerea
Otu321	2	0	0	0	1	7	22	58	27	21	Fungi
Otu320	1	6	7	3	1	3	6	37	24	2	Fungi;Zygomycota;Incertae_sedis;Mucorales;Umbelopsidaceae;Umbelopsis;Umbelopsis_sp
Otu323	0	6	2	0	2	2	40	2	45	3	Fungi;Basidiomycota;Agaricomycetes;Cantharellales;Clavulinaceae;Clavulina;Clavulina_sp
Otu322	0	0	0	7	0	1	22	21	12	68	Fungi;Basidiomycota;Agaricomycetes;Sebacinales;Sebacinaceae;Sebacina
Otu859	0	0	7	0	2	1	4	0	0	2	Fungi;Basidiomycota;Agaricomycetes;Sebacinales;Sebacinaceae
Otu858	0	0	0	0	0	0	5	0	6	0	Fungi;Basidiomycota
Otu857	0	0	0	0	1	0	6	0	0	0	Fungi;Basidiomycota;Agaricomycetes;Agaricales;Inocybaceae;Inocybe
Otu856	0	0	0	7	0	0	0	0	0	0	Fungi;Ascomycota;Sordariomycetes;Xylariales;Amphisphaeriaceae
Otu855	1	6	3	2	0	0	0	0	0	0	Fungi;Ascomycota;Sordariomycetes;Hypocreales;Cordycipitaceae;Lecanicillium;Lecanicillium_fungicola_var._aleophilum
Otu854	1	0	0	0	0	2	0	11	0	0	Fungi;Basidiomycota
Otu853	0	0	0	0	0	0	0	6	0	0	Fungi;Zygomycota;Incertae_sedis;Mortierellales;Mortierellaceae;Mortierella
Otu852	0	0	0	1	0	0	12	0	10	0	Fungi
Otu851	0	0	0	0	0	0	3	0	6	0	Fungi;Basidiomycota
Otu850	0	6	0	0	0	0	0	0	0	0	Fungi
Otu1622	0	0	2	0	0	0	0	0	0	0	Fungi;Ascomycota
Otu1623	0	2	0	0	0	0	0	0	0	0	Fungi;Basidiomycota;Agaricomycetes;Russulales;Russulaceae;Russula;Russula_velenovskyi
Otu1620	0	0	0	2	0	0	0	0	0	0	Fungi;Ascomycota
Otu1621	0	1	0	0	0	2	0	0	0	0	Fungi;Basidiomycota;Agaricomycetes;Agaricales;Inocybaceae;Inocybe
Otu1626	0	2	0	0	2	0	0	0	0	0	Fungi;Ascomycota
Otu1627	0	2	0	0	0	0	0	0	0	0	Fungi;Ascomycota;Sordariomycetes;Incertae_sedis;Magnaporthaceae
Otu1624	0	0	0	0	0	0	0	0	3	0	Fungi;Basidiomycota
Otu1625	0	2	0	0	0	0	0	0	0	0	Fungi;Basidiomycota;Agaricomycetes;Russulales;Peniophoraceae;Peniophora;Peniophora_sp_JY_035
Otu1628	0	3	0	0	0	0	0	0	0	0	Fungi;Basidiomycota
Otu1629	0	0	0	0	0	2	0	0	0	0	Fungi;Basidiomycota
Otu1718	0	1	0	0	0	0	0	0	2	0	Fungi
Otu1719	0	0	0	0	0	0	0	0	0	3	Fungi
Otu1716	0	0	0	0	0	0	4	0	0	0	Fungi;Basidiomycota
Otu1717	0	0	0	0	2	0	0	0	0	2	Fungi;Basidiomycota;Agaricomycetes;Russulales;Russulaceae;Russula
Otu1714	0	0	0	0	0	3	1	0	2	1	Fungi;Basidiomycota
Otu1715	0	3	2	0	0	0	0	0	0	0	Fungi;Ascomycota;Sordariomycetes;Chaetosphaeriales;Chaetosphaeriaceae;Chaetosphaeria;Chaetosphaeria_pygmaea
Otu1712	0	2	0	0	0	0	0	0	0	0	Fungi;Zygomycota;Incertae_sedis;Mortierellales;Mortierellaceae;Mortierella;Mortierella_cf_wolfii_CBS_61470
Otu1713	0	0	3	0	0	0	0	0	0	0	Fungi
Otu1710	0	0	0	0	0	2	1	0	0	0	Fungi;Ascomycota;Leotiomycetes;Helotiales;Phacidiaceae;Phacidium;Phacidium_lacerum
Otu1711	0	0	0	0	0	0	0	2	0	0	Fungi
Otu1433	0	0	3	0	0	0	0	0	0	0	Fungi;Ascomycota;Sordariomycetes
Otu1432	0	0	1	0	0	1	1	1	0	3	Fungi;Basidiomycota
Otu1431	0	0	3	0	0	0	0	0	0	0	Fungi;Basidiomycota
Otu1430	0	0	0	0	4	0	0	0	0	0	Fungi;Ascomycota;Leotiomycetes;Helotiales;Incertae_sedis;Scleropezicula;Scleropezicula_sp
Otu1437	0	0	0	0	0	3	0	0	0	2	Fungi
Otu1436	0	0	3	0	0	0	0	0	0	0	Fungi;Basidiomycota;Agaricomycetes;Agaricales;Psathyrellaceae;Coprinellus;Coprinellus_micaceus
Otu1435	0	3	0	0	0	0	0	0	0	0	Fungi;Basidiomycota;Agaricomycetes
Otu1434	0	0	0	0	3	0	0	3	0	0	Fungi;Basidiomycota
Otu1439	0	0	0	1	0	0	3	3	7	0	Fungi;Basidiomycota;Agaricomycetes;Agaricales;Inocybaceae;Inocybe;Inocybe_quietiodor
Otu1438	0	0	0	0	0	0	0	4	0	0	Fungi
Otu1121	0	0	0	0	0	4	0	0	0	0	Fungi
Otu1120	0	0	0	0	0	0	5	0	0	0	Fungi;Zygomycota;Incertae_sedis;Mortierellales;Mortierellaceae;Mortierella
Otu400	2	28	17	0	2	17	0	3	16	3	Fungi;Ascomycota;Leotiomycetes;Helotiales;Incertae_sedis;Scytalidium;Scytalidium_lignicola
Otu1389	0	0	0	0	0	0	0	0	0	3	Fungi;Basidiomycota;Agaricomycetes;Agaricales;Cortinariaceae;Cortinarius;Cortinarius_alpinus
Otu1388	0	1	0	3	1	0	0	0	0	0	Fungi;Ascomycota
Otu401	0	3	2	45	2	0	2	7	0	0	Fungi
Otu1385	0	0	0	0	0	0	0	4	0	0	Fungi
Otu1384	0	0	0	0	0	1	3	3	4	0	Fungi;Ascomycota;Pezizomycetes;Pezizales;Pezizaceae;Pachyphloeus
Otu1387	0	0	0	4	1	0	0	0	0	0	Fungi;Ascomycota;Dothideomycetes;Pleosporales;Massarinaceae;Massarina;Massarina_sp
Otu1386	0	0	3	0	0	0	0	0	0	0	Fungi;Basidiomycota;Agaricomycetes;Cantharellales;Hydnaceae;Sistotrema;Sistotrema_muscicola
Otu1381	0	0	0	2	0	2	0	3	0	0	Fungi
Otu1380	0	0	0	0	3	0	0	0	0	0	Fungi;Ascomycota;Leotiomycetes
Otu1383	0	3	0	0	0	1	0	0	0	1	Fungi;Basidiomycota
Otu1382	0	0	0	0	0	0	0	5	0	0	Fungi
Otu1549	0	2	0	2	2	0	0	0	0	0	Fungi;Ascomycota;Sordariomycetes;Hypocreales;Nectriaceae;Fusarium;Fusarium_sp_CCN3
Otu1548	0	0	0	0	0	0	2	0	0	0	Fungi;Basidiomycota
Otu1547	0	0	0	0	0	0	0	2	0	0	Fungi;Basidiomycota
Otu1546	0	0	1	0	0	2	0	0	5	0	Fungi;Ascomycota;Pezizomycetes;Pezizales;Pezizaceae;Pachyphloeus;Pachyphloeus_marroninus
Otu1545	0	0	0	0	0	2	0	0	0	0	Fungi;Ascomycota
Otu1544	0	2	0	0	0	0	0	0	0	0	Fungi;Ascomycota
Otu1543	1	0	0	0	0	2	1	0	0	0	Fungi;Basidiomycota;Agaricomycetes;Agaricales;Inocybaceae;Inocybe
Otu1542	0	3	4	0	2	0	0	2	3	1	Fungi;Ascomycota;Dothideomycetes;Pleosporales;Unclassified;Unclassified;Pleosporales_sp
Otu1541	0	0	0	0	2	0	0	2	0	0	Fungi;Basidiomycota;Agaricomycetes;Agaricales;Clavariaceae;Ramariopsis;Ramariopsis_flavescens
Otu1540	0	0	0	0	0	0	2	0	0	0	Fungi
Otu1554	0	2	0	2	1	0	0	0	0	0	Fungi
Otu1555	0	0	1	0	0	2	0	0	0	0	Fungi
Otu1556	3	2	1	0	0	8	0	9	9	2	Fungi;Basidiomycota;Agaricomycetes;Agaricales;Cortinariaceae;Cortinarius
Otu149	3	2	1	1	1	17	334	30	163	5	Fungi;Basidiomycota;Agaricomycetes;Russulales;Russulaceae;Russula;Russula_azurea
Otu1557	0	0	0	0	0	5	2	0	0	0	Fungi;Basidiomycota;Agaricomycetes;Agaricales;Inocybaceae;Inocybe
Otu148	0	4	1	0	22	2	0	0	0	135	Fungi;Basidiomycota;Agaricomycetes;Agaricales;Cortinariaceae;Cortinarius;Cortinarius_alpinus
Otu1550	0	3	2	0	0	0	0	0	0	0	Fungi;Ascomycota;Leotiomycetes
Otu1632	0	0	0	3	0	0	0	0	0	0	Fungi;Ascomycota;Dothideomycetes;Incertae_sedis;Incertae_sedis;Leptospora;Leptospora_rubella
Otu1498	0	0	0	0	0	0	0	0	4	0	Fungi;Basidiomycota
Otu1552	4	3	1	2	0	1	0	0	0	1	Fungi;Ascomycota;Sordariomycetes;Sordariales;Sordariaceae;Neurospora;Neurospora_terricola
Otu888	0	0	0	7	0	0	0	0	0	0	Fungi;Basidiomycota;Agaricomycetes;Polyporales;Phanerochaetaceae;Ceriporia;Ceriporia_inflata
Otu1553	0	0	0	0	0	1	1	0	3	2	Fungi;Basidiomycota;Agaricomycetes;Agaricales;Inocybaceae;Inocybe
Otu889	1	6	1	2	1	0	0	0	0	0	Fungi;Ascomycota;Dothideomycetes;Pleosporales;Incertae_sedis;Setomelanomma;Setomelanomma_holmii
Otu1099	0	0	4	0	0	0	0	0	0	0	Fungi;Ascomycota
Otu1098	0	0	0	0	1	3	7	1	3	6	Fungi
Otu1091	0	0	1	0	0	0	3	0	0	4	Fungi;Basidiomycota;Agaricomycetes
Otu1090	5	5	0	0	0	0	0	0	0	0	Fungi;Ascomycota;Sordariomycetes
Otu1093	0	0	0	0	0	3	0	0	5	0	Fungi
Otu1092	0	0	1	0	0	0	3	5	0	0	Fungi;Basidiomycota
Otu1095	1	0	0	4	0	3	0	0	0	0	Fungi;Ascomycota;Sordariomycetes;Hypocreales
Otu1094	0	0	1	2	0	1	1	0	4	0	Fungi;Ascomycota;Eurotiomycetes;Eurotiales;Trichocomaceae;Penicillium
Otu1097	0	0	0	0	1	0	6	4	0	0	Fungi;Basidiomycota;Agaricomycetes;Agaricales;Cortinariaceae;Cortinarius;Cortinarius_bulliardii
Otu1096	0	7	1	0	1	5	0	2	0	4	Fungi;Basidiomycota;Agaricomycetes;Sebacinales;Sebacinaceae;Sebacina;Sebacina_sp
Otu668	0	0	0	0	0	0	9	0	0	0	Fungi;Basidiomycota
Otu669	0	0	0	0	0	0	0	0	27	0	Fungi;Basidiomycota;Agaricomycetes;Agaricales;Inocybaceae;Inocybe;Inocybe_rimosa
Otu598	0	0	10	0	1	0	2	0	0	1	Fungi;Ascomycota;Sordariomycetes;Hypocreales;Hypocreaceae;Hypomyces;Hypomyces_odoratus
Otu599	2	12	0	0	2	0	0	0	0	10	Fungi;Ascomycota;Leotiomycetes;Helotiales;Incertae_sedis;Tetracladium;Tetracladium_sp
Otu592	3	0	13	0	0	0	22	0	16	0	Fungi;Basidiomycota;Agaricomycetes;Thelephorales;Thelephoraceae;Tomentella;Tomentella_sp_OTU208
Otu593	0	1	0	0	0	6	0	12	0	18	Fungi
Otu590	1	0	13	0	5	5	9	0	0	5	Fungi;Ascomycota;Leotiomycetes;Helotiales;Incertae_sedis;Leptodontidium;Leptodontidium_elatius
Otu591	1	1	0	13	0	0	1	4	21	13	Fungi;Basidiomycota;Agaricomycetes;Agaricales;Strophariaceae;Hebeloma
Otu596	2	0	2	0	12	0	0	0	0	0	Fungi;Basidiomycota;Tremellomycetes;Filobasidiales;Filobasidiaceae;Cryptococcus;Cryptococcus_arrabidensis
Otu597	0	0	0	0	0	4	0	11	0	0	Fungi;Basidiomycota
Otu594	16	6	21	9	2	0	0	9	0	0	Fungi;Ascomycota;Dothideomycetes;Pleosporales;Incertae_sedis;Paraphoma;Paraphoma_sp
Otu144	248	8	2	0	3	63	60	0	0	0	Fungi;Basidiomycota;Agaricomycetes;Agaricales;Cortinariaceae;Cortinarius
Otu147	0	107	16	0	4	0	1	0	0	0	Fungi;Ascomycota;Leotiomycetes;Helotiales;Helotiaceae;Hymenoscyphus;Hymenoscyphus_epiphyllus
Otu146	12	19	20	2	46	13	0	40	14	286	Fungi;Basidiomycota;Agaricomycetes;Cantharellales;Clavulinaceae;Clavulina;Clavulina_sp
Otu1165	0	0	8	0	0	0	0	0	0	0	Fungi;Ascomycota;Dothideomycetes;Pleosporales;Sporormiaceae;Preussia;Preussia_minima
Otu1164	0	4	0	0	0	0	0	0	0	0	Fungi;Ascomycota;Dothideomycetes;Pleosporales;Montagnulaceae;Paraconiothyrium
Otu1167	0	0	0	0	0	4	0	0	0	0	Fungi;Ascomycota;Dothideomycetes;Capnodiales;Mycosphaerellaceae;Phacellium;Phacellium_veronicae
Otu1166	0	4	0	0	0	0	0	1	0	0	Fungi;Ascomycota
Otu1161	0	0	0	0	0	0	0	5	0	0	Fungi
Otu1160	0	0	0	0	0	7	2	0	0	0	Fungi;Basidiomycota
Otu1163	0	0	4	0	0	0	0	0	0	5	Fungi;Basidiomycota;Tremellomycetes;Tremellales;Incertae_sedis;Cryptococcus;Cryptococcus_sp_QMW_2009a
Otu1162	0	0	0	0	1	0	6	0	0	0	Fungi
Otu444	0	4	0	10	2	25	0	5	0	0	Fungi;Basidiomycota;Agaricomycetes;Russulales;Russulaceae;Russula
Otu445	0	0	0	0	0	0	0	18	0	0	Fungi;Ascomycota;Sordariomycetes;Sordariales;Lasiosphaeriaceae
Otu446	0	0	1	23	0	0	0	2	0	0	Fungi;Basidiomycota
Otu447	0	0	19	0	0	7	4	9	0	0	Fungi;Ascomycota
Otu1169	1	5	0	0	0	0	0	1	0	1	Fungi;Basidiomycota;Microbotryomycetes;Sporidiobolales;Incertae_sedis
Otu1168	0	0	3	4	0	2	0	0	0	3	Fungi;Ascomycota;Sordariomycetes;Hypocreales;Cordycipitaceae;Cordyceps;Cordyceps_bassiana
Otu442	28	0	0	0	0	4	0	0	0	0	Fungi;Basidiomycota;Agaricomycetes;Agaricales;Tricholomataceae;Tricholoma;Tricholoma_bufonium
Otu443	0	0	0	0	0	0	7	13	31	0	Fungi;Basidiomycota;Agaricomycetes;Agaricales;Inocybaceae;Inocybe;Inocybe_putilla
Otu1367	0	0	0	0	0	0	0	1	0	6	Fungi;Basidiomycota;Agaricomycetes;Russulales;Russulaceae;Russula;Russula_romellii
Otu1366	0	0	4	0	0	0	0	0	0	0	Fungi;Basidiomycota;Agaricomycetes;Russulales;Auriscalpiaceae;Lentinellus;Lentinellus_castoreus
Otu1365	0	0	0	0	4	0	2	0	0	2	Fungi;Chytridiomycota;Chytridiomycetes;Olpidiales;Olpidiaceae;Olpidium;Olpidium_brassicae
Otu1364	0	0	7	0	1	0	0	0	0	0	Fungi;Basidiomycota;Agaricomycetes;Cantharellales;Ceratobasidiaceae;Unclassified;Ceratobasidiaceae_sp
Otu1363	0	0	3	1	1	0	0	0	0	0	Fungi;Ascomycota
Otu1362	0	3	1	1	0	0	4	0	1	3	Fungi
Otu1361	0	3	0	0	0	0	0	0	0	0	Fungi;Ascomycota;Leotiomycetes;Helotiales
Otu1360	1	0	0	0	3	2	0	1	0	0	Fungi;Basidiomycota;Tremellomycetes
Otu1369	0	0	0	0	0	0	2	0	3	0	Fungi
Otu1368	0	0	0	0	3	0	0	0	0	0	Fungi;Ascomycota;Dothideomycetes;Pleosporales;Leptosphaeriaceae;Coniothyrium;Coniothyrium_sp
Otu130	0	133	53	23	131	0	0	32	0	1	Fungi;Ascomycota;Dothideomycetes;Pleosporales;Incertae_sedis;Pyrenochaeta;Pyrenochaeta_sp
Otu131	0	9	3	5	0	123	0	0	0	4	Fungi;Basidiomycota;Agaricostilbomycetes;Agaricostilbales;Chionosphaeraceae;Kurtzmanomyces
Otu132	6	4	146	5	3	14	0	5	7	2	Fungi;Ascomycota;Dothideomycetes;Incertae_sedis;Myxotrichaceae;Gymnostellatospora;Gymnostellatospora_japonica
Otu133	0	0	134	0	0	0	3	0	0	0	Fungi;Ascomycota;Leotiomycetes
Otu134	134	0	23	0	9	45	8	9	4	2	Fungi;Basidiomycota;Agaricomycetes;Sebacinales;Sebacinaceae;Sebacina
Otu135	1	19	19	12	2	27	0	132	23	10	Fungi;Ascomycota;Sordariomycetes;Hypocreales;Nectriaceae;Haematonectria;Haematonectria_haematococca
Otu136	102	32	177	126	141	8	21	63	29	21	Fungi;Zygomycota;Incertae_sedis;Mortierellales;Mortierellaceae;Mortierella;Mortierella_globulifera
Otu137	0	2	1	3	2	3	69	132	0	12	Fungi;Basidiomycota;Agaricomycetes;Sebacinales;Sebacinaceae;Sebacina;Sebacina_sp
Otu138	6	4	0	7	0	161	73	0	18	0	Fungi;Basidiomycota;Agaricomycetes;Russulales;Russulaceae;Russula;Russula_cremeoavellanea
Otu139	50	138	141	48	13	61	136	77	42	55	Fungi;Ascomycota;Leotiomycetes;Helotiales;Dermateaceae;Unclassified;uncultured_Dermateaceae
Otu918	0	8	2	0	0	1	0	2	0	3	Fungi;Basidiomycota;Agaricomycetes;Agaricales;Strophariaceae;Hebeloma
Otu919	0	1	2	0	0	6	0	3	0	20	Fungi;Basidiomycota;Agaricomycetes;Agaricales;Agaricaceae;Bovista;Bovista_promontorii
Otu916	0	0	1	0	0	0	0	6	0	0	Fungi
Otu917	6	4	3	5	1	0	0	10	2	0	Fungi;Ascomycota;Leotiomycetes;Helotiales
Otu914	0	0	0	0	0	2	1	6	0	0	Fungi;Ascomycota
Otu915	0	0	0	0	1	4	0	0	0	6	Fungi;Basidiomycota;Agaricomycetes;Russulales;Russulaceae;Russula
Otu912	0	0	0	0	0	0	6	0	0	0	Fungi;Ascomycota;Saccharomycetes;Saccharomycetales;Lipomycetaceae;Lipomyces;Lipomyces_sp
Otu913	1	0	0	0	0	6	0	0	0	0	Fungi;Basidiomycota
Otu910	0	0	0	0	8	0	3	0	6	0	Fungi;Zygomycota;Incertae_sedis;Mortierellales;Mortierellaceae;Mortierella;Mortierella_beljakovae
Otu911	0	3	8	0	0	0	0	0	0	3	Fungi
Otu624	0	8	13	12	1	0	0	0	0	2	Fungi
Otu625	0	0	0	0	11	0	0	0	0	0	Fungi;Ascomycota;Sordariomycetes;Incertae_sedis
Otu626	0	16	0	10	0	0	0	5	0	0	Fungi;Basidiomycota
Otu627	0	0	2	0	0	0	0	10	0	0	Fungi;Basidiomycota
Otu620	0	0	0	0	2	6	13	1	28	2	Fungi;Ascomycota;Orbiliomycetes;Unclassified;Unclassified;Unclassified;Orbiliomycetes_sp
Otu621	0	5	0	8	1	0	0	5	3	14	Fungi;Ascomycota;Dothideomycetes;Pleosporales
Otu622	0	0	0	0	0	0	12	0	0	0	Fungi;Ascomycota;Pezizomycetes;Pezizales;Incertae_sedis;Pulvinula;Pulvinula_sp
Otu623	2	0	0	14	0	2	0	0	0	0	Fungi;Basidiomycota;Agaricomycetes;Thelephorales;Thelephoraceae
Otu628	0	11	7	13	0	0	0	9	0	3	Fungi;Ascomycota;Dothideomycetes;Pleosporales;Incertae_sedis;Phoma
Otu629	4	4	2	4	0	11	11	1	20	15	Fungi
Otu242	0	0	0	0	0	0	0	55	0	0	Fungi;Basidiomycota
Otu828	3	7	0	1	1	0	0	0	1	0	Fungi;Ascomycota;Dothideomycetes;Pleosporales
Otu829	7	0	0	0	0	0	0	0	0	0	Fungi;Ascomycota
Otu243	1	0	0	0	0	72	0	0	0	0	Fungi;Ascomycota;Leotiomycetes;Helotiales
Otu822	6	1	0	0	2	0	1	4	3	7	Fungi;Zygomycota;Incertae_sedis;Mortierellales;Mortierellaceae;Mortierella
Otu823	0	0	0	0	0	0	1	0	9	0	Fungi
Otu820	0	0	0	8	0	0	0	0	0	0	Fungi;Ascomycota;Sordariomycetes;Hypocreales;Clavicipitaceae;Metacordyceps
Otu821	0	0	0	4	2	0	10	0	0	0	Fungi;Ascomycota;Sordariomycetes;Sordariales;Lasiosphaeriaceae;Apodus;Apodus_sp
Otu826	0	0	0	0	0	0	7	0	0	0	Fungi;Ascomycota
Otu827	1	0	0	0	0	0	3	6	0	0	Fungi
Otu824	0	0	0	0	0	0	0	0	9	0	Fungi;Basidiomycota;Agaricomycetes;Agaricales;Clavariaceae;Clavaria;Clavaria_acuta
Otu825	0	0	0	0	9	0	0	0	3	0	Fungi;Basidiomycota;Agaricomycetes;Thelephorales;Thelephoraceae;Tomentella;Tomentella_subtestacea
Otu241	0	0	0	0	3	51	0	2	1	0	Fungi;Ascomycota;Sordariomycetes;Hypocreales;Cordycipitaceae;Simplicillium
Otu246	11	23	48	6	19	9	0	6	0	9	Fungi;Ascomycota;Sordariomycetes;Hypocreales;Nectriaceae;Neonectria;Neonectria_sp
Otu247	3	0	0	1	0	31	66	1	29	0	Fungi;Basidiomycota;Agaricomycetes;Russulales;Russulaceae;Lactifluus;Lactifluus_bertillonii
Otu244	0	51	0	0	6	0	0	5	0	0	Fungi;Basidiomycota
Otu245	0	0	0	0	0	0	65	0	0	0	Fungi;Basidiomycota;Agaricomycetes;Agaricales;Cortinariaceae;Cortinarius;Cortinarius_multiformis
Otu1891	0	0	1	4	0	2	0	3	0	0	Fungi
Otu1890	1	3	0	0	1	0	0	1	0	1	Fungi;Ascomycota
Otu1769	0	0	3	0	0	0	0	0	0	0	Fungi;Basidiomycota;Agaricomycetes;Agaricales;Strophariaceae;Hymenogaster;Hymenogaster_decorus
Otu1768	0	0	0	0	0	0	0	0	2	0	Fungi;Basidiomycota
Otu1763	0	0	0	0	0	2	0	0	0	0	Fungi;Basidiomycota
Otu1762	0	0	2	0	2	0	0	0	0	0	Fungi;Ascomycota;Leotiomycetes
Otu1761	0	0	0	0	0	0	0	2	0	0	Fungi;Zygomycota;Incertae_sedis;Mortierellales;Mortierellaceae;Mortierella
Otu1760	0	0	0	0	0	3	0	0	0	0	Fungi;Basidiomycota
Otu1767	0	4	1	0	0	0	0	0	0	0	Fungi;Ascomycota;Dothideomycetes;Venturiales;Unclassified;Unclassified;Venturiales_sp
Otu1766	0	0	0	0	0	0	0	2	0	0	Fungi
Otu1765	0	4	0	0	0	0	0	0	0	0	Fungi;Ascomycota
Otu1764	0	0	0	0	0	0	0	2	0	0	Fungi;Basidiomycota;Agaricomycetes;Russulales;Russulaceae;Russula;Russula_odorata
Otu1420	1	0	0	0	1	0	0	0	0	4	Fungi;Ascomycota
Otu1421	2	0	3	3	0	1	0	0	0	0	Fungi;Ascomycota;Dothideomycetes;Capnodiales;Davidiellaceae;Cladosporium;Cladosporium_sp_CBS_55279
Otu1422	0	3	0	3	2	0	1	0	0	3	Fungi;Ascomycota;Dothideomycetes;Pleosporales;Massarinaceae;Unclassified;Massarinaceae_sp
Otu1423	0	0	0	0	0	3	0	0	0	0	Fungi;Ascomycota;Sordariomycetes;Xylariales;Xylariaceae;Xylaria
Otu1424	0	0	0	3	0	0	0	0	0	0	Fungi;Basidiomycota;Agaricomycetes;Thelephorales;Thelephoraceae;Tomentella;Tomentella_coerulea
Otu1425	0	0	0	0	0	0	0	0	3	0	Fungi
Otu1426	0	0	0	0	0	0	0	0	0	4	Fungi;Ascomycota;Leotiomycetes;Helotiales
Otu1427	0	1	0	3	1	0	0	0	0	0	Fungi;Ascomycota;Sordariomycetes;Hypocreales;Incertae_sedis;Sarocladium;Sarocladium_strictum
Otu1428	0	4	4	1	3	2	0	0	0	0	Fungi;Ascomycota
Otu1429	0	0	3	3	1	0	0	0	0	0	Fungi;Ascomycota
Otu1398	0	4	0	0	0	0	0	0	0	0	Fungi;Ascomycota;Incertae_sedis;Incertae_sedis;Incertae_sedis;Veronaea
Otu1399	1	0	0	0	0	0	0	3	0	0	Fungi;Ascomycota;Leotiomycetes;Helotiales
Otu1392	0	0	3	0	0	0	0	0	0	0	Fungi;Ascomycota;Sordariomycetes;Sordariales;Lasiosphaeriaceae
Otu1393	0	0	0	0	4	0	0	0	0	3	Fungi;Basidiomycota;Agaricomycetes;Thelephorales;Thelephoraceae
Otu1390	0	0	0	0	0	0	0	4	0	0	Fungi;Ascomycota;Dothideomycetes;Pleosporales;Lophiostomataceae;Lophiostoma;Lophiostoma_cynaroidis
Otu1391	5	0	0	0	0	5	1	0	0	1	Fungi;Basidiomycota;Agaricomycetes;Sebacinales;Sebacinaceae
Otu1396	0	0	0	0	0	0	0	3	3	0	Fungi;Basidiomycota;Agaricomycetes;Agaricales;Inocybaceae;Inocybe;Inocybe_putilla
Otu1397	0	0	0	0	6	0	0	0	0	1	Fungi;Basidiomycota;Microbotryomycetes;Sporidiobolales;Incertae_sedis;Sporobolomyces;Sporobolomyces_inositophilus
Otu1394	2	3	2	0	0	0	0	0	0	0	Fungi;Basidiomycota;Microbotryomycetes;Sporidiobolales;Incertae_sedis;Sporobolomyces
Otu1395	0	3	0	0	0	0	0	0	0	0	Fungi;Ascomycota;Sordariomycetes;Sordariales;Lasiosphaeriaceae;Unclassified;Lasiosphaeriaceae_sp
Otu29	42	694	375	35	46	548	1320	2484	1067	368	Fungi;Basidiomycota;Wallemiomycetes;Geminibasidiales;Geminibasidiaceae;Geminibasidium;Geminibasidium_sp
Otu28	120	85	66	5	840	133	189	17	110	63	Fungi;Ascomycota;Dothideomycetes;Hysteriales;Gloniaceae;Cenococcum;uncultured_Cenococcum
Otu25	73	34	140	62	58	21	1092	137	53	59	Fungi;Zygomycota;Incertae_sedis;Mortierellales;Mortierellaceae;Mortierella;Mortierella_cystojenkinii
Otu24	190	1364	1240	769	199	165	92	340	70	134	Fungi;Ascomycota;Leotiomycetes
Otu27	5	926	445	7	44	7	7	9	17	16	Fungi;Ascomycota;Sordariomycetes;Sordariales;Chaetomiaceae;Humicola;Humicola_nigrescens
Otu26	375	22	603	1665	769	586	158	83	4	130	Fungi;Basidiomycota;Agaricomycetes;Agaricales;Cortinariaceae;Cortinarius
Otu21	62	149	149	60	25	1	24	1256	40	4	Fungi;Ascomycota;Leotiomycetes;Helotiales;Incertae_sedis;Cadophora;Cadophora_finlandica
Otu20	1769	35	17	63	330	27	59	9	7	5	Fungi;Basidiomycota;Agaricomycetes;Thelephorales;Thelephoraceae
Otu23	174	1997	1672	135	463	72	84	58	29	40	Fungi;Ascomycota;Sordariomycetes;Hypocreales;Incertae_sedis;Ilyonectria;Ilyonectria_robusta
Otu22	1872	287	39	56	81	73	18	70	269	192	Fungi;Basidiomycota;Agaricomycetes;Agaricales;Cortinariaceae;Cortinarius
Otu1086	0	0	0	0	0	2	0	0	4	0	Fungi;Basidiomycota
Otu1087	0	4	0	0	0	0	0	0	0	0	Fungi;Ascomycota;Leotiomycetes;Helotiales
Otu1084	0	0	4	0	0	0	0	0	0	0	Fungi;Ascomycota;Dothideomycetes;Botryosphaeriales;Incertae_sedis;Camarosporium;Camarosporium_sp
Otu1085	1	9	16	9	0	3	0	0	0	5	Fungi;Basidiomycota;Agaricomycetes;Agaricales;Psathyrellaceae;Coprinellus;Coprinellus_radians
Otu1082	0	0	0	0	4	0	0	2	0	0	Fungi;Ascomycota;Leotiomycetes;Helotiales;Rutstroemiaceae;Scleromitrula;Scleromitrula_spiraeicola
Otu1083	0	0	0	0	0	4	0	0	0	0	Fungi;Ascomycota;Leotiomycetes;Helotiales;Incertae_sedis;Catenulifera;Catenulifera_sp
Otu1080	0	0	0	0	0	0	0	8	0	0	Fungi
Otu1081	0	0	0	0	0	0	0	4	0	0	Fungi
Otu1088	0	5	0	0	0	0	0	0	0	0	Fungi;Ascomycota;Sordariomycetes
Otu1089	0	4	0	0	0	0	0	0	0	0	Fungi;Ascomycota;Leotiomycetes
Otu589	0	0	0	0	0	1	5	4	20	0	Fungi;Basidiomycota
Otu588	0	8	0	0	3	2	13	0	0	0	Fungi;Ascomycota;Leotiomycetes;Helotiales;Rutstroemiaceae;Lambertella;Lambertella_advenula
Otu581	11	22	18	10	11	4	4	4	0	5	Fungi;Ascomycota;Sordariomycetes;Hypocreales;Hypocreaceae;Hypocrea;Hypocrea_stellata
Otu580	0	0	0	12	0	0	0	0	0	0	Fungi;Ascomycota;Sordariomycetes;Xylariales;Amphisphaeriaceae
Otu583	0	4	2	0	1	0	11	0	7	0	Fungi;Ascomycota
Otu582	2	3	4	1	1	4	14	5	12	7	Fungi
Otu585	11	5	0	0	0	3	0	16	0	9	Fungi;Zygomycota;Incertae_sedis;Mortierellales;Mortierellaceae;Mortierella;Mortierella_sp
Otu584	29	25	2	0	0	28	2	5	0	0	Fungi;Basidiomycota;Agaricomycetes;Agaricales;Cortinariaceae;Cortinarius;Cortinarius_glaucopus
Otu587	1	15	8	1	17	0	0	0	0	0	Fungi;Ascomycota;Sordariomycetes;Xylariales
Otu586	0	0	0	0	0	1	11	0	5	0	Fungi;Zygomycota;Incertae_sedis;Mortierellales;Mortierellaceae;Mortierella
Otu1172	0	0	0	0	5	0	0	0	0	3	Fungi;Basidiomycota;Agaricomycetes;Cantharellales;Ceratobasidiaceae
Otu1173	0	0	4	0	0	0	0	0	0	0	Fungi;Ascomycota;Dothideomycetes;Pleosporales
Otu1170	4	4	0	0	8	0	0	0	0	0	Fungi;Basidiomycota;Agaricomycetes;Cantharellales;Ceratobasidiaceae;Rhizoctonia;Rhizoctonia_sp
Otu458	35	0	0	4	5	37	8	3	5	11	Fungi;Basidiomycota;Agaricomycetes;Cantharellales;Clavulinaceae;Clavulina;Clavulina_rugosa
Otu1176	0	11	0	0	6	0	0	0	0	0	Fungi;Basidiomycota;Agaricomycetes;Atheliales;Atheliaceae;Athelopsis;Athelopsis_sp
Otu1177	0	5	0	5	0	0	0	0	0	0	Fungi;Ascomycota;Leotiomycetes;Helotiales
Otu1174	0	0	0	0	0	4	0	0	0	0	Fungi;Ascomycota;Incertae_sedis;Incertae_sedis;Incertae_sedis;Xenochalara;Xenochalara_juniperi
Otu1175	0	0	0	0	0	0	0	0	5	0	Fungi;Basidiomycota
Otu453	0	41	15	0	3	0	0	0	0	0	Fungi;Basidiomycota;Agaricomycetes;Thelephorales;Thelephoraceae;Tomentella;Tomentella_clavigera
Otu452	23	0	7	0	0	0	0	0	0	0	Fungi;Basidiomycota;Agaricomycetes;Thelephorales;Thelephoraceae;Tomentella;Tomentella_sp_OTU215
Otu451	0	1	0	18	0	0	0	0	0	0	Fungi;Basidiomycota;Microbotryomycetes;Sporidiobolales;Incertae_sedis;Rhodosporidium;Rhodosporidium_diobovatum
Otu450	4	33	22	4	2	2	0	0	0	0	Fungi;Ascomycota;Sordariomycetes;Hypocreales;Nectriaceae
Otu457	1	8	17	7	21	0	0	0	2	9	Fungi;Ascomycota;Leotiomycetes;Helotiales
Otu456	1	17	17	3	7	0	5	9	0	10	Fungi
Otu455	115	388	254	113	112	92	107	66	94	74	Fungi;Ascomycota;Sordariomycetes;Hypocreales;Hypocreaceae
Otu454	0	16	17	0	11	0	0	0	0	0	Fungi;Ascomycota;Sordariomycetes;Xylariales
Otu1374	0	0	0	0	0	0	0	4	0	0	Fungi
Otu1375	0	0	0	0	0	0	1	0	13	0	Fungi;Basidiomycota;Agaricomycetes;Agaricales;Inocybaceae;Inocybe
Otu1376	0	0	0	0	0	4	0	0	0	0	Fungi;Basidiomycota
Otu1377	0	0	1	0	0	0	1	4	0	0	Fungi
Otu1370	0	3	0	0	0	0	0	0	0	1	Fungi;Ascomycota;Sordariomycetes;Xylariales;Incertae_sedis;Microdochium;Microdochium_sp
Otu1371	0	0	3	0	0	0	0	0	0	2	Fungi
Otu1372	0	0	0	3	0	0	0	0	0	0	Fungi;Basidiomycota;Agaricomycetes;Cantharellales;Ceratobasidiaceae;Ceratobasidium;Ceratobasidium_sp_EE_2011
Otu1373	0	0	6	0	1	0	0	0	0	0	Fungi;Basidiomycota;Agaricomycetes;Russulales;Russulaceae;Lactarius;Lactarius_torminosulus
Otu1378	0	0	0	0	0	0	0	0	5	0	Fungi;Basidiomycota;Agaricomycetes;Agaricales;Entolomataceae;Entoloma
Otu1379	0	0	3	0	0	0	0	0	0	0	Fungi;Ascomycota;Eurotiomycetes;Chaetothyriales;Herpotrichiellaceae;Cladophialophora;Cladophialophora_sp
Otu1853	0	3	0	0	0	0	0	0	0	0	Fungi;Basidiomycota;Agaricomycetes;Agaricales;Tricholomataceae
Otu459	1	7	2	24	1	15	0	0	0	9	Fungi;Zygomycota;Incertae_sedis;Mortierellales;Mortierellaceae;Mortierella
Otu1171	0	0	0	0	0	0	0	4	2	0	Fungi;Ascomycota
Otu1529	0	0	0	0	0	5	0	0	0	0	Fungi;Basidiomycota;Tremellomycetes;Cystofilobasidiales;Cystofilobasidiaceae;Udeniomyces;Udeniomyces_pyricola
Otu1178	0	1	0	4	3	0	0	0	0	1	Fungi;Ascomycota;Dothideomycetes;Pleosporales;Cucurbitariaceae;Unclassified;Cucurbitariaceae_sp
Otu1528	0	0	0	2	0	0	0	0	0	0	Fungi;Ascomycota;Leotiomycetes;Helotiales
Otu1179	0	0	0	0	0	0	0	6	0	0	Fungi;Ascomycota;Sordariomycetes;Xylariales;Diatrypaceae
Otu129	114	0	15	0	1	157	71	22	188	0	Fungi;Basidiomycota;Agaricomycetes;Russulales;Russulaceae;Russula;Russula_vitellina
Otu128	58	18	35	11	3	188	246	43	153	7	Fungi;Basidiomycota;Agaricomycetes;Russulales;Russulaceae;Russula
Otu127	0	0	0	0	0	0	0	0	146	0	Fungi;Basidiomycota;Agaricomycetes;Russulales;Russulaceae;Russula
Otu126	210	12	4	3	4	3	40	10	11	4	Fungi;Basidiomycota;Agaricomycetes;Thelephorales;Thelephoraceae
Otu125	0	6	16	0	0	0	1	144	6	5	Fungi;Ascomycota;Sordariomycetes;Hypocreales;Nectriaceae;Fusarium;Fusarium_euwallaceae
Otu124	0	216	97	4	35	0	0	0	0	0	Fungi;Ascomycota;Sordariomycetes;Chaetosphaeriales;Chaetosphaeriaceae;Dictyochaeta;Dictyochaeta_simplex
Otu123	167	0	0	0	0	0	0	0	0	0	Fungi;Ascomycota;Eurotiomycetes;Eurotiales;Trichocomaceae;Sagenomella;Sagenomella_sp
Otu122	4	16	128	15	29	3	7	12	6	1	Fungi;Ascomycota;Leotiomycetes;Helotiales;Dermateaceae
Otu121	0	13	4	1	8	148	8	29	35	11	Fungi;Basidiomycota;Agaricomycetes;Sebacinales;Sebacinaceae;Sebacina;Sebacina_sp
Otu120	5	142	77	69	90	30	8	103	0	25	Fungi;Ascomycota;Dothideomycetes;Pleosporales;Pleosporaceae;Alternaria;Alternaria_alternata
Otu909	0	0	0	2	0	0	1	2	6	1	Fungi;Basidiomycota
Otu908	0	6	1	0	0	0	6	2	0	3	Fungi;Ascomycota;Leotiomycetes;Helotiales;Incertae_sedis;Hyalodendriella
Otu905	0	6	0	0	0	0	0	0	0	0	Fungi;Ascomycota;Sordariomycetes
Otu904	0	5	0	0	0	0	5	0	7	0	Fungi;Basidiomycota;Agaricomycetes;Cantharellales;Incertae_sedis;Minimedusa;Minimedusa_sp
Otu907	0	1	0	0	2	0	1	5	9	0	Fungi;Basidiomycota
Otu906	0	0	0	0	0	3	8	0	5	0	Fungi;Basidiomycota
Otu901	0	7	0	0	0	0	0	0	0	0	Fungi;Ascomycota
Otu900	0	0	0	0	6	0	0	0	0	0	Fungi;Zygomycota;Incertae_sedis;Mortierellales;Mortierellaceae;Mortierella;Mortierella_antarctica
Otu903	0	6	0	0	2	2	0	0	0	3	Fungi
Otu902	1	7	0	8	0	0	2	8	0	0	Fungi;Ascomycota;Eurotiomycetes;Chaetothyriales;Herpotrichiellaceae;Rhinocladiella;Rhinocladiella_sp_04001a
Otu1526	0	0	0	0	0	2	0	0	0	0	Fungi;Basidiomycota
Otu633	1	13	0	0	0	0	0	0	11	0	Fungi;Ascomycota;Sordariomycetes;Hypocreales;Nectriaceae;Cylindrocarpon;Cylindrocarpon_sp
Otu632	1	0	1	0	0	0	10	0	0	0	Fungi
Otu631	0	0	0	0	0	0	25	0	0	0	Fungi
Otu630	6	0	0	0	16	0	0	0	0	0	Fungi;Ascomycota;Leotiomycetes;Helotiales;Rutstroemiaceae;Unclassified;Rutstroemiaceae_sp
Otu637	3	0	11	0	0	10	2	0	0	0	Fungi;Basidiomycota
Otu636	1	0	0	0	0	4	0	4	24	1	Fungi;Ascomycota;Pezizomycetes;Pezizales;Pyronemataceae;Otidea;Otidea_smithii
Otu635	0	0	0	12	0	1	0	0	0	0	Fungi;Ascomycota
Otu634	2	2	8	2	0	0	11	0	0	0	Fungi;Basidiomycota
Otu639	0	0	0	0	0	0	0	11	0	0	Fungi;Ascomycota;Leotiomycetes;Helotiales;Incertae_sedis;Hyalodendriella
Otu638	0	0	4	0	1	0	0	0	10	0	Fungi;Basidiomycota;Microbotryomycetes;Sporidiobolales;Incertae_sedis;Rhodotorula;Rhodotorula_ferulica
Otu839	0	0	0	0	0	1	0	1	7	0	Fungi;Ascomycota;Incertae_sedis;Incertae_sedis;Incertae_sedis;Calcarisporiella;Calcarisporiella_sp
Otu838	0	6	0	0	0	0	0	0	0	0	Fungi
Otu831	0	0	0	0	0	0	0	0	9	0	Fungi;Basidiomycota;Agaricomycetes;Agaricales;Cortinariaceae;Cortinarius;Cortinarius_saniosus
Otu830	0	15	0	0	0	0	10	0	0	0	Fungi;Ascomycota;Sordariomycetes;Coniochaetales;Coniochaetaceae;Lecythophora;Lecythophora_fasciculata
Otu833	0	9	0	0	3	7	0	0	0	0	Fungi;Ascomycota;Sordariomycetes;Hypocreales;Nectriaceae
Otu832	0	0	0	0	0	0	0	0	7	0	Fungi;Ascomycota;Sordariomycetes;Xylariales;Xylariaceae
Otu835	1	19	1	0	0	0	0	0	0	0	Fungi;Basidiomycota;Agaricomycetes;Sebacinales;Unclassified;Unclassified;Sebacinales_sp
Otu834	1	0	0	0	1	5	2	11	0	10	Fungi;Basidiomycota;Agaricomycetes;Atheliales;Atheliaceae;Piloderma;Piloderma_fallax
Otu837	0	0	0	7	0	0	0	0	0	0	Fungi;Ascomycota;Dothideomycetes;Pleosporales;Sporormiaceae;Preussia
Otu836	0	1	1	0	0	2	0	13	0	3	Fungi;Ascomycota;Dothideomycetes;Dothideales;Dothioraceae;Hormonema;Hormonema_prunorum
Otu1888	0	2	0	3	2	0	0	1	0	1	Fungi;Basidiomycota;Agaricomycetes;Agaricales;Tricholomataceae;Delicatula;Delicatula_integrella
Otu1889	0	0	0	0	0	0	0	4	0	0	Fungi;Basidiomycota;Agaricomycetes;Agaricales;Entolomataceae;Entoloma
Otu1886	0	0	0	0	0	0	2	0	0	0	Fungi;Ascomycota;Sordariomycetes;Xylariales;Xylariaceae;Coniolariella;Coniolariella_sp
Otu1887	0	4	5	2	0	0	1	1	2	0	Fungi;Basidiomycota;Agaricomycetes;Phallales;Phallaceae;Phallus;Phallus_impudicus
Otu1884	0	0	0	1	0	2	0	0	0	0	Fungi
Otu1885	0	0	0	0	0	2	0	0	0	0	Fungi;Ascomycota
Otu1882	0	0	2	0	0	0	1	0	0	0	Fungi;Basidiomycota;Agaricomycetes;Thelephorales;Thelephoraceae
Otu1883	0	0	0	0	2	0	0	0	0	0	Fungi;Ascomycota;Sordariomycetes
Otu1880	0	0	1	0	0	0	0	3	0	0	Fungi;Basidiomycota
Otu1881	0	0	2	0	0	0	0	0	0	0	Fungi;Basidiomycota;Agaricomycetes;Agaricales
Otu732	0	9	5	1	0	0	0	0	0	0	Fungi;Ascomycota;Leotiomycetes;Helotiales;Hyaloscyphaceae
Otu733	2	1	0	2	0	7	14	5	4	5	Fungi
Otu730	0	0	0	0	0	0	8	0	0	7	Fungi;Basidiomycota
Otu731	0	0	0	0	0	0	0	0	0	9	Fungi;Ascomycota;Sordariomycetes;Sordariales
Otu736	2	24	7	4	11	2	0	0	4	4	Fungi;Ascomycota;Dothideomycetes;Capnodiales;Teratosphaeriaceae
Otu737	16	4	0	0	0	0	0	0	0	0	Fungi;Basidiomycota;Agaricomycetes;Thelephorales;Thelephoraceae;Tomentella;Tomentella_badia
Otu734	8	5	0	4	0	0	0	7	3	0	Fungi;Basidiomycota;Agaricomycetes;Thelephorales;Thelephoraceae;Tomentella;Tomentella_subclavigera
Otu735	0	2	0	13	1	0	0	0	0	0	Fungi;Ascomycota;Eurotiomycetes;Chaetothyriales;Herpotrichiellaceae
Otu1778	0	0	2	0	0	0	3	0	0	0	Fungi;Basidiomycota;Microbotryomycetes;Sporidiobolales;Incertae_sedis;Rhodotorula;Rhodotorula_ferulica
Otu1779	0	0	0	2	0	0	0	0	0	0	Fungi;Ascomycota;Saccharomycetes;Saccharomycetales;Incertae_sedis;Debaryomyces;Debaryomyces_prosopidis
Otu1770	0	1	0	0	3	0	0	0	0	0	Fungi;Ascomycota
Otu1771	0	0	0	6	1	0	0	1	0	0	Fungi
Otu1772	0	0	0	0	3	0	0	0	0	0	Fungi;Ascomycota;Dothideomycetes;Pleosporales;Phaeosphaeriaceae;Phaeosphaeriopsis;Phaeosphaeriopsis_sp
Otu1773	0	0	0	0	0	2	0	0	0	0	Fungi;Basidiomycota
Otu1774	0	0	0	0	0	2	0	0	0	0	Fungi
Otu1775	0	0	0	0	2	0	0	0	0	0	Fungi;Ascomycota;Leotiomycetes
Otu1776	0	0	2	0	0	0	0	0	0	0	Fungi;Ascomycota
Otu1777	0	0	0	0	0	0	0	0	0	2	Fungi;Ascomycota;Dothideomycetes;Capnodiales
Otu1419	0	0	1	0	0	3	0	0	3	3	Fungi
Otu1418	0	0	0	3	0	0	0	0	0	0	Fungi;Ascomycota
Otu1415	0	3	0	0	0	0	0	0	0	0	Fungi;Basidiomycota;Microbotryomycetes;Sporidiobolales;Incertae_sedis;Sporobolomyces;Sporobolomyces_symmetricus
Otu1414	0	0	0	0	3	0	0	0	0	0	Fungi;Basidiomycota;Microbotryomycetes;Sporidiobolales;Incertae_sedis;Sporobolomyces;Sporobolomyces_inositophilus
Otu1417	0	0	0	5	0	0	0	0	0	0	Fungi;Basidiomycota
Otu1416	0	0	0	0	0	0	4	0	0	1	Fungi
Otu1411	0	0	3	0	1	0	1	0	0	0	Fungi;Ascomycota;Eurotiomycetes;Chaetothyriales;Herpotrichiellaceae;Cladophialophora;Cladophialophora_sp_20104730d
Otu1410	0	0	0	0	0	0	0	0	3	0	Fungi
Otu1413	0	3	0	0	0	0	0	0	0	0	Fungi;Ascomycota;Sordariomycetes;Hypocreales;Nectriaceae
Otu1412	0	0	4	0	0	0	0	0	0	0	Fungi;Ascomycota;Eurotiomycetes;Chaetothyriales;Herpotrichiellaceae;Phialophora;Phialophora_verrucosa
Otu1569	0	0	0	0	2	0	0	0	0	0	Fungi;Ascomycota;Eurotiomycetes;Chaetothyriales;Herpotrichiellaceae;Phaeomoniella
Otu1568	0	2	4	2	0	4	0	1	0	0	Fungi
Otu38	0	2	11	534	0	0	0	0	0	0	Fungi;Ascomycota;Sordariomycetes;Hypocreales;Incertae_sedis;Myrothecium;Myrothecium_inundatum
Otu39	634	1	0	1	31	125	9	16	93	11	Fungi;Basidiomycota;Agaricomycetes;Russulales;Russulaceae;Russula;Russula_sp_HMAS262355
Otu36	820	1	0	0	3	221	156	208	60	11	Fungi;Basidiomycota;Agaricomycetes;Cantharellales;Clavulinaceae
Otu37	0	0	4	0	36	21	209	634	8	34	Fungi;Basidiomycota;Agaricomycetes;Russulales;Russulaceae;Russula
Otu34	6	0	0	0	16	1	12	3	0	679	Fungi;Ascomycota;Dothideomycetes;Pleosporales;Incertae_sedis;Herpotrichia;Herpotrichia_juniperi
Otu35	394	279	336	482	585	117	89	163	145	136	Fungi;Basidiomycota;Tremellomycetes;Filobasidiales;Filobasidiaceae;Cryptococcus;Cryptococcus_terricola
Otu32	73	8	26	3	32	1256	905	1528	635	696	Fungi;Basidiomycota;Agaricomycetes;Russulales;Russulaceae;Russula;Russula_cyanoxantha
Otu33	80	10	2	0	4	214	82	756	159	110	Fungi;Basidiomycota;Agaricomycetes;Sebacinales;Sebacinaceae;Sebacina;Sebacina_epigaea
Otu30	0	0	7	0	0	0	0	0	14	787	Fungi;Ascomycota
Otu31	183	65	185	58	341	450	578	715	508	190	Fungi;Zygomycota;Incertae_sedis;Mortierellales;Mortierellaceae;Mortierella;Mortierella_sp
Otu1103	1	6	2	0	0	3	0	0	0	0	Fungi;Basidiomycota
Otu1102	0	0	0	9	0	0	0	0	0	0	Fungi;Basidiomycota;Agaricomycetes;Agaricales
Otu1101	0	0	0	0	0	0	0	2	9	0	Fungi
Otu1100	0	2	0	0	0	0	0	0	0	10	Fungi;Basidiomycota
Otu426	0	7	9	6	27	1	5	18	5	11	Fungi;Basidiomycota;Agaricomycetes;Auriculariales;Incertae_sedis
Otu427	2	16	1	20	2	4	0	0	1	0	Fungi;Ascomycota;Eurotiomycetes;Eurotiales;Trichocomaceae;Penicillium;Penicillium_bialowiezense
Otu424	2	0	0	2	23	0	0	0	0	0	Fungi;Ascomycota;Sordariomycetes;Sordariales
Otu425	2	22	10	0	1	2	4	7	7	1	Fungi;Ascomycota
Otu1189	0	0	0	4	0	1	0	0	0	0	Fungi;Basidiomycota
Otu1188	0	1	5	5	0	0	0	0	0	0	Fungi;Ascomycota;Eurotiomycetes;Eurotiales;Trichocomaceae;Aspergillus;Aspergillus_cibarius
Otu1187	0	0	0	0	0	4	0	0	0	0	Fungi
Otu422	0	0	0	0	0	0	0	24	0	0	Fungi
Otu1185	0	4	1	0	3	2	0	0	0	0	Fungi;Ascomycota;Sordariomycetes;Hypocreales
Otu1184	0	4	1	1	1	0	2	0	0	0	Fungi;Basidiomycota;Microbotryomycetes;Leucosporidiales;Leucosporidiaceae;Leucosporidiella;Leucosporidiella_muscorum
Otu1183	5	0	0	0	0	0	0	0	0	0	Fungi;Ascomycota;Pezizomycetes;Pezizales;Pyronemataceae;Humaria;Humaria_hemisphaerica
Otu1182	0	1	0	0	4	0	0	0	0	0	Fungi;Ascomycota;Eurotiomycetes;Eurotiales;Trichocomaceae;Paecilomyces;Paecilomyces_penicillatus
Otu1181	0	4	9	0	0	0	0	0	0	0	Fungi;Ascomycota
Otu423	0	8	20	0	22	0	0	0	0	0	Fungi;Ascomycota;Incertae_sedis;Incertae_sedis;Incertae_sedis;Phialea;Phialea_sp
Otu1341	0	0	0	0	0	5	6	0	0	4	Fungi;Basidiomycota
Otu1340	0	0	0	0	0	0	5	0	0	0	Fungi
Otu1343	0	0	0	0	0	0	0	6	0	0	Fungi;Basidiomycota;Agaricomycetes;Atheliales;Atheliaceae;Athelia;Athelia_bombacina
Otu1342	0	0	0	0	0	2	5	4	8	0	Fungi;Basidiomycota;Agaricomycetes;Agaricales;Inocybaceae;Inocybe;Inocybe_cookei
Otu1345	6	0	0	0	0	0	0	0	0	0	Fungi;Basidiomycota;Agaricomycetes;Cantharellales;Ceratobasidiaceae;Rhizoctonia;Rhizoctonia_sp
Otu352	0	16	87	1	20	13	15	27	15	0	Fungi
Otu1347	0	0	0	0	0	0	0	3	0	0	Fungi
Otu1346	0	0	0	0	0	0	4	0	0	0	Fungi
Otu1349	1	0	0	0	3	0	0	1	0	0	Fungi;Basidiomycota
Otu1348	11	24	6	7	2	114	236	45	92	220	Fungi;Basidiomycota;Agaricomycetes;Russulales;Russulaceae;Unclassified;Russulaceae_sp
Otu421	0	0	30	0	0	0	0	0	0	0	Fungi;Ascomycota;Dothideomycetes;Dothideales;Dothioraceae;Sydowia;Sydowia_polyspora
Otu480	0	0	0	0	0	0	0	16	0	0	Fungi
Otu481	0	0	0	0	6	9	6	4	15	0	Fungi;Basidiomycota;Agaricomycetes;Boletales;Boletaceae;Boletus;Boletus_reticulatus
Otu482	1	0	0	0	0	0	0	16	0	0	Fungi;Ascomycota;Sordariomycetes;Microascales;Microascaceae;Petriella
Otu483	23	5	5	0	0	1	0	0	0	0	Fungi;Basidiomycota;Agaricomycetes;Agaricales;Cortinariaceae;Cortinarius;Cortinarius_aff_paragaudis_TN02_273
Otu484	0	15	9	2	0	0	0	0	0	0	Fungi;Ascomycota;Dothideomycetes;Pleosporales;Lophiostomataceae;Lophiostoma;Lophiostoma_corticola
Otu485	5	0	0	0	2	3	23	0	3	0	Fungi;Basidiomycota;Agaricomycetes;Agaricales;Cortinariaceae;Cortinarius
Otu486	5	23	18	2	30	5	22	18	0	0	Fungi;Zygomycota;Incertae_sedis;Mortierellales;Mortierellaceae;Mortierella
Otu487	0	0	0	0	0	0	0	0	0	15	Fungi;Ascomycota;Leotiomycetes;Helotiales
Otu488	1	14	15	0	0	0	8	2	12	0	Fungi;Zygomycota;Incertae_sedis;Mortierellales;Mortierellaceae;Mortierella;Mortierella_antarctica
Otu489	6	25	19	0	10	5	7	0	7	15	Fungi;Ascomycota;Leotiomycetes;Helotiales;Unclassified;Unclassified;Helotiales_sp
Otu334	0	0	37	0	9	0	0	0	0	0	Fungi;Ascomycota
Otu335	0	0	0	6	32	0	0	0	0	0	Fungi;Zygomycota;Incertae_sedis;Mortierellales;Mortierellaceae;Mortierella;Mortierella_gemmifera
Otu332	0	0	0	0	0	0	0	3	33	0	Fungi;Basidiomycota;Agaricomycetes;Sebacinales;Sebacinaceae;Sebacina;Sebacina_sp
Otu333	0	16	39	16	0	0	0	0	0	0	Fungi;Basidiomycota;Agaricomycetes;Sebacinales
Otu330	0	0	0	8	0	2	38	3	35	1	Fungi;Zygomycota;Incertae_sedis;Mucorales;Umbelopsidaceae;Umbelopsis;Umbelopsis_dimorpha
Otu331	5	0	0	0	6	38	1	0	0	25	Fungi;Basidiomycota;Agaricomycetes;Agaricales;Cortinariaceae;Cortinarius;Cortinarius_disjungendus
Otu158	8	10	4	1	115	10	31	20	6	1	Fungi;Ascomycota;Leotiomycetes
Otu159	0	71	31	55	7	7	114	26	9	5	Fungi;Ascomycota;Pezizomycetes;Pezizales;Pezizaceae;Peziza;Peziza_sp
Otu152	0	0	0	0	0	0	0	0	197	0	Fungi;Basidiomycota;Agaricomycetes
Otu153	0	107	80	2	5	0	54	6	0	0	Fungi;Ascomycota;Leotiomycetes;Helotiales;Sclerotiniaceae
Otu150	1	2	2	0	0	48	122	24	0	6	Fungi;Basidiomycota;Agaricomycetes;Sebacinales;Sebacinaceae;Sebacina;Sebacina_epigaea
Otu151	8	9	18	4	2	49	134	124	126	43	Fungi;Basidiomycota;Agaricomycetes;Sebacinales;Sebacinaceae;Tremellodendron;Tremellodendron_sp
Otu156	10	0	0	0	0	18	25	169	98	22	Fungi;Basidiomycota;Agaricomycetes;Agaricales;Inocybaceae;Inocybe;Inocybe_rimosa
Otu157	0	0	53	6	54	2	26	136	9	16	Fungi;Basidiomycota;Agaricomycetes;Russulales;Russulaceae
Otu154	15	142	62	40	59	11	12	31	9	8	Fungi;Ascomycota;Lecanoromycetes;Lecanorales;Unclassified;Unclassified;Lecanorales_sp
Otu155	6	193	162	134	79	1	0	14	0	3	Fungi;Ascomycota;Eurotiomycetes;Chaetothyriales;Herpotrichiellaceae;Capronia;Capronia_sp
Otu938	0	0	0	0	0	0	6	0	0	0	Fungi;Basidiomycota;Agaricomycetes;Sebacinales;Sebacinaceae;Sebacina;Sebacina_sp
Otu939	0	0	0	0	1	1	0	0	0	5	Fungi
Otu930	0	0	0	5	0	0	5	5	0	0	Fungi;Basidiomycota;Agaricomycetes;Agaricales;Clavariaceae;Ramariopsis;Ramariopsis_flavescens
Otu931	0	0	0	0	0	0	3	8	0	0	Fungi;Basidiomycota
Otu932	0	0	2	8	0	0	0	0	0	0	Fungi;Zygomycota;Incertae_sedis;Mucorales;Umbelopsidaceae;Umbelopsis;Umbelopsis_isabellina
Otu933	0	0	0	5	0	0	0	0	0	2	Fungi;Ascomycota;Dothideomycetes;Pleosporales;Massarinaceae;Saccharicola;Saccharicola_sp
Otu934	0	0	0	0	0	6	0	0	0	0	Fungi;Ascomycota;Sordariomycetes
Otu935	0	0	9	0	2	0	3	0	0	0	Fungi;Basidiomycota
Otu936	0	0	0	0	0	0	5	0	0	0	Fungi;Basidiomycota
Otu937	0	4	11	0	0	4	0	0	0	0	Fungi;Ascomycota;Leotiomycetes;Incertae_sedis;Incertae_sedis;Collophora;Collophora_sp
Otu804	1	0	0	0	0	0	0	3	11	0	Fungi;Basidiomycota;Agaricomycetes;Agaricales;Entolomataceae;Entoloma;Entoloma_rhodopolium
Otu805	0	10	3	0	0	0	0	0	0	0	Fungi;Ascomycota;Eurotiomycetes;Eurotiales;Trichocomaceae;Penicillium;Penicillium_sp_857
Otu806	0	0	0	7	0	0	0	0	0	0	Fungi;Ascomycota;Leotiomycetes;Helotiales;Helotiaceae;Unclassified;Helotiaceae_sp
Otu807	0	7	4	4	0	0	0	0	0	0	Fungi;Basidiomycota
Otu800	0	0	0	0	0	0	11	0	0	0	Fungi;Basidiomycota;Agaricomycetes;Agaricales;Cortinariaceae;Cortinarius;Cortinarius_livido-ochraceus
Otu801	0	0	0	0	0	0	0	0	9	0	Fungi;Ascomycota;Sordariomycetes;Hypocreales;Hypocreaceae
Otu802	0	21	6	0	7	4	2	5	0	4	Fungi;Ascomycota;Dothideomycetes;Botryosphaeriales;Unclassified;Unclassified;Botryosphaeriales_sp
Otu803	0	0	0	0	0	0	0	0	0	8	Fungi;Basidiomycota
Otu808	0	0	0	0	0	0	0	7	0	0	Fungi;Ascomycota;Sordariomycetes;Sordariales;Lasiosphaeriaceae
Otu809	0	3	6	8	5	0	0	2	0	0	Fungi;Ascomycota;Sordariomycetes;Hypocreales;Nectriaceae;Fusarium;Fusarium_sporotrichioides
Otu1108	0	3	1	1	0	1	0	1	4	0	Fungi;Zygomycota;Incertae_sedis;Mortierellales;Mortierellaceae;Mortierella;Mortierella_sp
Otu1745	0	0	0	0	0	0	0	0	3	0	Fungi;Basidiomycota
Otu1744	0	0	3	2	1	0	0	0	0	0	Fungi;Basidiomycota
Otu1747	0	0	1	0	0	0	2	0	0	0	Fungi;Ascomycota;Pezizomycetes;Pezizales;Pezizaceae;Unclassified;Pezizaceae_sp
Otu1746	5	1	1	2	2	0	1	0	0	0	Fungi;Ascomycota;Dothideomycetes;Pleosporales;Unclassified;Unclassified;Pleosporales_sp
Otu1741	0	0	2	0	0	0	0	0	0	0	Fungi;Basidiomycota;Agaricomycetes;Agaricales;Pluteaceae;Pluteus;Pluteus_cervinus
Otu1740	0	5	0	0	0	0	0	0	0	0	Fungi;Chytridiomycota;Chytridiomycetes;Spizellomycetales;Spizellomycetaceae;Powellomyces;Powellomyces_sp_JEL95
Otu1743	0	0	0	0	2	0	0	0	0	0	Fungi
Otu1742	0	1	0	0	0	2	0	2	0	1	Fungi;Basidiomycota
Otu1749	0	0	0	0	0	0	0	0	0	2	Fungi;Zygomycota;Incertae_sedis;Mortierellales;Mortierellaceae;Mortierella
Otu1748	4	0	0	0	0	0	0	0	0	0	Fungi;Ascomycota;Leotiomycetes;Helotiales;Helotiaceae;Crocicreas
Otu215	0	0	0	0	0	0	0	0	62	0	Fungi;Basidiomycota;Agaricomycetes;Agaricales;Inocybaceae;Inocybe
Otu214	1	6	64	0	7	0	0	0	0	0	Fungi;Ascomycota;Leotiomycetes
Otu1408	0	0	0	0	0	0	0	1	3	0	Fungi;Ascomycota;Sordariomycetes
Otu1409	0	0	3	0	0	0	0	0	0	0	Fungi;Ascomycota;Dothideomycetes;Pleosporales;Incertae_sedis
Otu1402	5	3	0	0	0	0	0	0	0	0	Fungi;Ascomycota;Eurotiomycetes;Eurotiales;Trichocomaceae;Penicillium;Penicillium_sp_857
Otu1403	0	0	0	0	0	0	3	0	0	0	Fungi;Basidiomycota;Agaricomycetes;Russulales;Russulaceae;Russula
Otu1400	0	0	0	0	4	0	0	0	0	0	Fungi;Basidiomycota;Agaricomycetes;Agaricales;Tricholomataceae
Otu1401	0	1	0	0	0	3	0	0	0	0	Fungi
Otu1406	0	0	1	0	4	0	0	0	0	0	Fungi;Basidiomycota;Agaricomycetes;Agaricales;Psathyrellaceae;Coprinopsis;Coprinopsis_phlyctidospora
Otu1407	0	0	1	0	0	4	0	0	0	0	Fungi;Basidiomycota
Otu1404	0	0	1	2	0	2	0	4	0	0	Fungi;Ascomycota;Leotiomycetes;Helotiales;Dermateaceae;Pezicula;Pezicula_alnicola
Otu1405	0	0	0	0	0	0	0	0	3	0	Fungi;Basidiomycota;Agaricomycetes;Russulales;Hericiaceae;Hericium;Hericium_erinaceum
Otu1531	0	0	0	0	3	0	0	0	0	0	Fungi;Basidiomycota;Agaricomycetes;Auriculariales;Unclassified;Unclassified;Auriculariales_sp
Otu217	6	49	79	10	16	10	2	72	7	35	Fungi;Ascomycota;Sordariomycetes;Xylariales;Xylariaceae;Daldinia;Daldinia_fissa
Otu1536	1	0	0	0	2	0	0	0	0	0	Fungi;Ascomycota
Otu216	0	0	8	0	0	71	0	27	0	0	Fungi;Basidiomycota
Otu1576	0	0	0	0	0	2	4	0	3	4	Fungi;Basidiomycota;Agaricomycetes
Otu1577	0	2	0	0	0	1	0	0	0	0	Fungi;Ascomycota;Leotiomycetes;Helotiales;Helotiaceae;Neobulgaria;Neobulgaria_sp
Otu1574	0	0	0	2	0	0	0	0	0	0	Fungi;Basidiomycota;Agaricomycetes;Agaricales;Pluteaceae;Pluteus;Pluteus_thomsonii
Otu1575	0	0	0	0	3	0	0	0	0	0	Fungi;Ascomycota;Leotiomycetes;Helotiales;Incertae_sedis;Cystodendron;Cystodendron_sp_EXP0561F
Otu1572	2	2	0	0	1	0	4	0	0	0	Fungi;Ascomycota;Sordariomycetes;Hypocreales;Nectriaceae;Neonectria;Neonectria_sp_SMr01
Otu1573	0	0	0	0	0	0	0	0	5	0	Fungi;Basidiomycota
Otu1570	0	2	0	0	2	0	0	0	0	0	Fungi
Otu1571	0	0	0	0	0	0	0	2	0	0	Fungi;Basidiomycota
Otu1578	0	0	0	0	2	0	0	0	0	0	Fungi;Ascomycota
Otu1579	0	0	3	0	0	0	2	0	2	0	Fungi
Otu211	143	0	0	0	0	9	0	0	0	0	Fungi;Basidiomycota;Agaricomycetes;Agaricales;Agaricaceae;Lepiota;Lepiota_magnispora
Otu1534	0	4	4	1	4	3	0	0	0	6	Fungi;Ascomycota
Otu210	0	0	4	0	0	0	71	31	56	6	Fungi;Basidiomycota;Agaricomycetes;Cantharellales;Clavulinaceae;Membranomyces;Membranomyces_sp
Otu213	8	25	22	5	119	60	27	19	0	15	Fungi;Ascomycota;Leotiomycetes;Helotiales
Otu212	19	7	116	41	10	8	42	12	23	7	Fungi;Zygomycota;Incertae_sedis;Mucorales;Umbelopsidaceae;Umbelopsis
Otu1198	0	4	0	0	0	0	0	0	0	0	Fungi;Ascomycota;Leotiomycetes;Helotiales
Otu1199	0	0	0	0	0	0	0	0	0	4	Fungi;Ascomycota;Sordariomycetes;Xylariales;Xylariaceae;Nemania;Nemania_sp
Otu1194	0	9	0	4	5	2	3	0	0	0	Fungi;Basidiomycota;Agaricomycetes
Otu1195	0	0	5	0	0	0	0	0	0	0	Fungi;Basidiomycota;Tremellomycetes;Tremellales;Incertae_sedis;Dioszegia;Dioszegia_zsoltii_var._yunnanensis
Otu1196	0	4	2	0	1	0	0	0	0	3	Fungi;Basidiomycota;Agaricomycetes;Polyporales;Polyporaceae;Spongipellis
Otu1197	0	0	0	0	0	0	0	0	4	0	Fungi;Zygomycota;Incertae_sedis;Mortierellales;Mortierellaceae;Mortierella
Otu1190	0	4	0	0	0	0	0	0	0	0	Fungi;Basidiomycota
Otu1191	6	0	0	0	0	0	0	0	0	0	Fungi;Basidiomycota;Agaricomycetes;Russulales;Russulaceae;Lactarius;Lactarius_mammosus
Otu1192	0	0	0	0	0	0	0	0	5	0	Fungi;Basidiomycota
Otu1193	1	0	0	0	0	1	0	3	6	3	Fungi;Ascomycota;Pezizomycetes;Pezizales;Pyronemataceae;Genea;Genea_balsleyi
Otu1358	0	5	0	0	0	1	0	2	0	2	Fungi;Basidiomycota;Agaricomycetes;Agaricales;Strophariaceae
Otu1359	0	0	0	0	0	2	0	5	0	0	Fungi
Otu1356	1	0	0	0	0	4	0	0	0	0	Fungi;Ascomycota;Dothideomycetes;Incertae_sedis;Pseudeurotiaceae;Pseudeurotium;Pseudeurotium_sp
Otu1357	0	0	0	0	0	2	3	0	0	0	Fungi;Ascomycota;Dothideomycetes;Capnodiales;Mycosphaerellaceae
Otu1354	0	0	0	7	0	0	0	0	0	0	Fungi;Ascomycota;Leotiomycetes;Helotiales
Otu1355	0	0	0	0	0	0	0	4	0	0	Fungi;Ascomycota;Saccharomycetes;Saccharomycetales;Incertae_sedis;Cyberlindnera;Cyberlindnera_fabianii
Otu1352	0	0	0	0	0	1	0	3	0	4	Fungi;Ascomycota;Pezizomycetes;Pezizales;Pyronemataceae;Genea
Otu1353	0	0	0	0	0	0	0	4	0	0	Fungi
Otu1350	0	2	3	0	1	0	0	0	0	0	Fungi;Basidiomycota;Microbotryomycetes;Sporidiobolales;Incertae_sedis;Unclassified;Sporidiobolales_sp
Otu1351	2	0	0	3	0	0	0	0	0	0	Fungi;Basidiomycota;Tremellomycetes;Trichosporonales;Trichosporonaceae;Trichosporon
Otu329	35	4	0	1	13	0	18	5	0	0	Fungi;Basidiomycota;Agaricomycetes;Thelephorales;Thelephoraceae;Tomentella;Tomentella_lapida
Otu328	0	0	2	0	0	0	0	5	0	34	Fungi;Basidiomycota;Agaricomycetes;Agaricales;Clavariaceae;Ramariopsis;Ramariopsis_flavescens
Otu499	2	0	0	16	0	0	0	0	0	0	Fungi;Ascomycota;Dothideomycetes;Incertae_sedis;Pseudeurotiaceae;Unclassified;Pseudeurotiaceae_sp
Otu498	0	0	0	0	0	0	20	14	20	0	Fungi;Basidiomycota;Agaricomycetes;Thelephorales;Thelephoraceae
Otu497	0	17	4	6	5	9	0	0	0	0	Fungi;Ascomycota;Sordariomycetes
Otu496	0	12	17	0	8	0	4	0	5	0	Fungi;Ascomycota;Sordariomycetes;Xylariales;Amphisphaeriaceae;Immersidiscosia;Immersidiscosia_eucalypti
Otu495	2	20	9	10	0	6	20	12	0	8	Fungi;Ascomycota;Dothideomycetes;Pleosporales;Leptosphaeriaceae;Leptosphaeria
Otu494	4	18	18	13	1	0	0	11	0	17	Fungi
Otu493	2	8	15	2	6	6	0	1	0	0	Fungi;Basidiomycota;Tremellomycetes;Tremellales;Incertae_sedis;Cryptococcus;Cryptococcus_aerius
Otu492	15	12	10	1	12	33	0	4	0	1	Fungi;Basidiomycota;Agaricomycetes;Sebacinales;Sebacinaceae;Sebacina;Sebacina_sp
Otu491	1	8	17	2	2	0	0	6	0	0	Fungi;Ascomycota;Sordariomycetes;Xylariales;Xylariaceae;Daldinia;Daldinia_grandis
Otu490	19	1	0	3	0	4	1	3	9	0	Fungi;Basidiomycota
Otu1753	5	0	1	1	4	4	9	3	14	3	Fungi;Zygomycota;Incertae_sedis;Mortierellales;Mortierellaceae;Mortierella
Otu1118	0	5	0	0	0	0	0	0	5	0	Fungi;Ascomycota;Sordariomycetes;Diaporthales;Schizoparmaceae;Pilidiella;Pilidiella_tibouchinae
Otu927	0	2	0	0	6	0	0	0	0	0	Fungi
Otu926	0	0	1	5	0	0	0	0	0	0	Fungi;Basidiomycota;Agaricomycetes;Thelephorales;Thelephoraceae;Tomentella;Tomentella_sp_IB2005315
Otu925	0	5	0	6	0	0	0	0	0	0	Fungi;Ascomycota;Dothideomycetes;Incertae_sedis;Myxotrichaceae;Oidiodendron;Oidiodendron_chlamydosporicum
Otu924	0	0	0	0	0	0	5	0	0	0	Fungi;Basidiomycota;Agaricomycetes;Agaricales;Amanitaceae;Amanita
Otu923	0	5	2	0	0	7	0	0	0	0	Fungi;Zygomycota;Incertae_sedis;Mortierellales;Mortierellaceae;Mortierella
Otu922	0	0	5	0	0	6	0	0	0	0	Fungi;Ascomycota;Sordariomycetes;Xylariales
Otu921	0	0	0	0	0	2	5	0	0	0	Fungi;Basidiomycota
Otu920	7	6	2	0	8	2	0	3	0	0	Fungi
Otu141	70	4	0	0	1	3	8	9	112	30	Fungi;Basidiomycota;Agaricomycetes;Cantharellales;Hydnaceae;Sistotrema;Sistotrema_muscicola
Otu140	2	15	0	11	46	148	6	12	0	8	Fungi;Ascomycota;Sordariomycetes;Xylariales;Amphisphaeriaceae;Adisciso;Adisciso_kaki
Otu143	7	23	3	1	0	9	26	140	90	1	Fungi;Basidiomycota;Agaricomycetes;Sebacinales;Sebacinaceae;Sebacina;Sebacina_sp
Otu142	6	177	33	80	76	0	0	0	0	6	Fungi;Ascomycota;Eurotiomycetes;Chaetothyriales;Herpotrichiellaceae;Cladophialophora;Cladophialophora_sp
Otu145	28	100	67	16	128	12	22	0	0	10	Fungi;Ascomycota;Leotiomycetes;Helotiales;Helotiaceae
Otu1119	0	0	4	0	0	0	0	0	0	0	Fungi;Basidiomycota;Microbotryomycetes;Sporidiobolales;Incertae_sedis;Rhodotorula;Rhodotorula_vanillica
Otu929	0	3	3	2	0	8	0	5	0	15	Fungi;Ascomycota
Otu928	0	0	3	1	1	0	0	5	0	0	Fungi;Ascomycota;Dothideomycetes;Pleosporales;Leptosphaeriaceae;Leptosphaeria;Leptosphaeria_sp_W65_4
Otu813	0	0	0	0	0	0	0	9	0	0	Fungi;Basidiomycota;Agaricomycetes;Sebacinales;Sebacinaceae;Tremellodendron;Tremellodendron_sp
Otu812	9	7	0	3	3	2	0	0	0	0	Fungi;Ascomycota
Otu811	7	4	5	0	9	6	0	0	0	11	Fungi;Basidiomycota;Agaricomycetes;Agaricales;Tricholomataceae;Clitocybe;Clitocybe_sp
Otu810	0	3	0	1	0	0	0	8	0	0	Fungi;Basidiomycota
Otu817	0	0	0	37	0	0	25	37	0	0	Fungi;Basidiomycota;Agaricomycetes;Agaricales;Cortinariaceae;Cortinarius
Otu816	0	4	5	3	1	0	0	7	0	0	Fungi
Otu815	0	0	2	0	0	0	0	8	0	0	Fungi;Ascomycota;Saccharomycetes;Saccharomycetales;Dipodascaceae;Basidioascus;Basidioascus_undulatus
Otu814	0	8	0	0	0	0	0	0	0	0	Fungi;Ascomycota;Dothideomycetes;Incertae_sedis;Myxotrichaceae;Oidiodendron;Oidiodendron_maius
Otu819	0	0	0	0	0	16	0	0	0	0	Fungi;Ascomycota;Dothideomycetes;Capnodiales;Mycosphaerellaceae
Otu818	0	0	0	0	7	0	0	0	0	0	Fungi;Ascomycota
Otu1503	0	0	0	0	0	0	0	4	0	0	Fungi;Basidiomycota;Agaricomycetes;Thelephorales;Thelephoraceae
Otu1502	0	0	2	0	0	0	0	0	0	0	Fungi;Basidiomycota
Otu1501	0	0	4	2	2	0	0	0	0	3	Fungi;Chytridiomycota;Chytridiomycetes;Rhizophydiales
Otu1500	0	4	1	3	4	3	0	0	0	0	Fungi;Chytridiomycota;Chytridiomycetes;Spizellomycetales;Spizellomycetaceae;Powellomyces
Otu1507	0	0	0	0	2	0	0	0	0	0	Fungi;Basidiomycota;Agaricomycetes;Auriculariales;Incertae_sedis;Auricularia;Auricularia_auricula_judae
Otu11	60	33	42	18	2514	0	23	4	0	10	Fungi;Basidiomycota;Agaricomycetes;Thelephorales;Thelephoraceae;Tomentella;Tomentella_sp
Otu1505	0	0	0	0	0	0	0	0	4	0	Fungi
Otu1504	0	0	0	0	0	0	0	0	4	0	Fungi
Otu578	0	0	2	0	0	0	0	0	0	12	Fungi;Basidiomycota;Agaricomycetes;Agaricales;Cortinariaceae;Cortinarius
Otu1508	0	0	0	0	0	0	0	4	0	0	Fungi;Basidiomycota
Otu579	0	0	0	0	0	0	0	12	0	0	Fungi;Basidiomycota;Agaricomycetes;Agaricales;Strophariaceae
Otu1752	0	0	0	0	0	0	2	0	0	0	Fungi
Otu1019	0	1	0	4	2	0	5	4	0	0	Fungi;Basidiomycota
Otu1750	0	0	0	0	0	5	0	0	2	1	Fungi
Otu1751	2	4	0	0	0	0	0	0	0	0	Fungi;Basidiomycota;Microbotryomycetes
Otu1756	0	0	4	1	1	0	0	0	0	2	Fungi;Basidiomycota;Agaricomycetes;Agaricales;Lycoperdaceae;Unclassified;Lycoperdaceae_sp
Otu1757	0	0	3	0	0	0	0	0	0	0	Fungi
Otu1754	0	0	0	0	0	0	3	0	0	0	Fungi;Basidiomycota
Otu1018	0	2	0	5	0	0	0	0	0	0	Fungi;Basidiomycota
Otu1758	0	0	0	0	0	2	0	1	0	0	Fungi;Ascomycota;Orbiliomycetes;Orbiliales;Orbiliaceae;Dactylellina;Dactylellina_drechsleri
Otu1759	0	0	0	0	0	2	0	0	0	0	Fungi
Otu978	0	6	0	0	4	0	0	0	0	0	Fungi;Basidiomycota;Microbotryomycetes;Sporidiobolales;Incertae_sedis;Sporobolomyces;Sporobolomyces_oryzicola
Otu979	0	0	0	0	0	0	0	1	5	0	Fungi
Otu206	2	9	0	0	0	72	0	0	0	0	Fungi;Ascomycota;Leotiomycetes;Helotiales;Helotiaceae;Hymenoscyphus;Hymenoscyphus_sp_1558
Otu208	10	79	85	83	30	20	20	91	59	25	Fungi;Ascomycota;Sordariomycetes;Hypocreales;Incertae_sedis;Acremonium;Acremonium_sp_LB_2012
Otu757	0	0	0	0	0	0	0	0	8	0	Fungi;Basidiomycota
Otu974	0	0	0	0	5	0	0	0	0	0	Fungi;Basidiomycota
Otu1527	0	0	2	0	0	0	0	0	0	0	Fungi;Ascomycota;Eurotiomycetes;Chaetothyriales;Herpotrichiellaceae;Exophiala;Exophiala_sp
Otu207	83	85	1	48	35	60	0	0	73	0	Fungi;Basidiomycota;Agaricomycetes;Agaricales;Cortinariaceae;Cortinarius
Otu204	0	0	0	0	0	0	79	0	0	0	Fungi;Basidiomycota;Agaricomycetes;Russulales;Russulaceae
Otu205	5	112	97	76	70	4	0	34	0	98	Fungi;Ascomycota;Eurotiomycetes;Chaetothyriales;Herpotrichiellaceae;Exophiala
Otu202	0	12	35	93	4	14	7	7	0	4	Fungi;Ascomycota;Leotiomycetes;Helotiales;Incertae_sedis;Hyalodendriella;Hyalodendriella_sp
Otu203	0	3	0	72	2	2	0	0	0	0	Fungi;Ascomycota;Sordariomycetes
Otu14	414	21	55	56	1036	2513	1082	298	643	738	Fungi;Basidiomycota;Agaricomycetes;Russulales;Russulaceae;Russula;Russula_xerampelina
Otu15	34	24	0	0	3	140	200	2051	274	184	Fungi;Basidiomycota;Agaricomycetes;Russulales;Russulaceae;Russula;Russula_pallidospora
Otu16	348	1636	1769	1070	705	330	224	532	204	338	Fungi;Ascomycota;Eurotiomycetes;Chaetothyriales;Herpotrichiellaceae;Exophiala;Exophiala_sp_KL_2011f
Otu17	101	1589	1925	178	302	79	36	59	22	26	Fungi;Ascomycota;Sordariomycetes;Hypocreales;Incertae_sedis;Ilyonectria;Ilyonectria_macrodidyma
Otu10	484	357	554	488	333	446	239	470	2673	63	Fungi;Basidiomycota;Agaricomycetes;Agaricales;Cortinariaceae;Cortinarius
Otu200	22	11	4	0	5	53	72	11	154	22	Fungi;Basidiomycota;Agaricomycetes;Sebacinales;Sebacinaceae;Sebacina;Sebacina_sp
Otu12	1220	202	223	43	451	50	2034	62	21	141	Fungi;Zygomycota;Incertae_sedis;Mortierellales;Mortierellaceae;Mortierella
Otu13	1960	461	757	681	4572	744	135	341	2547	122	Fungi;Basidiomycota;Agaricomycetes;Agaricales;Cortinariaceae;Cortinarius;Cortinarius_casimiri
Otu1509	3	0	0	0	2	0	5	0	1	0	Fungi;Ascomycota;Leotiomycetes;Helotiales
Otu973	0	0	8	0	0	3	5	6	2	1	Fungi
Otu18	86	3	30	9	8	593	1069	622	1935	40	Fungi;Basidiomycota;Agaricomycetes;Atheliales;Atheliaceae;Unclassified;Atheliaceae_sp
Otu19	740	740	572	471	1476	318	135	319	92	310	Fungi;Zygomycota;Incertae_sedis;Mortierellales;Mortierellaceae;Mortierella;Mortierella_gamsii
