# Supplementary material for: The community composition variation of Russulaceae associated with the Quercus mongolica forest during the growing season at Wudalianchi City, China
Source: PeerJ. 2020 Feb 12;8:e8527. doi: 10.7717/peerj.8527 (PMC7023826; doi:10.7717/peerj.8527)
Supplement: Supplemental Information 2 [file peerj-08-8527-s002.xls]

## Sheet: Sheet1
Table2 Data of nine abiotic factors
Month	MR (mm)	RH (%)	Temp (℃)	SM( %)	PH	N(mg/kg)	K(mg/kg)	SOM(%)	P(mg/kg)
June	221.7	84	15.9	54.6	5.73	230.748	449.509	12.0321	22.003
July	251.6	87	20.8	57.08	6.05	321.67	523.097	15.6911	34.9014
August	145.4	86	17.3	61.61	6.14	321.325	610.583	17.6709	32.3217
September	121.8	80	10.7	56.54	6.13	332.346	496.932	17.6694	26.783
October	25.6	76	3.6	64.51	5.83	291.707	552.531	15.9281	27.5417
soil pH、 soil moisture (SM)、 soil available phosphorus (P)、 soil organic matter (SOM)、 soil effective nitrogen (N)、 soil available potassium (K)、 monthly rainfall (MR)、 average month relative humidity (RH)、 average month air temperature (Temp).
