# Supplementary material for: The community composition variation of Russulaceae associated with the Quercus mongolica forest during the growing season at Wudalianchi City, China
Source: PeerJ. 2020 Feb 12;8:e8527. doi: 10.7717/peerj.8527 (PMC7023826; doi:10.7717/peerj.8527)
Supplement: Supplemental Information 5 [file peerj-08-8527-s005.xls]

## Sheet: Sheet1
	Species name	Genbank accession
	Lactarius evosmus	MN737756
	Lactarius torminosus	MN704764
	Lactarius trivialis	MN704807
	Lactarius vietus	MN704811
	Lactifluus Bertillonii	MN704762
	Russula aurata	MN704814
	Russula atroglauca	MN704761
	Russula odorata	MN704822
	Russula foetens	MN704817
	Russula font-queri	MN704820
	Russula globispora	MN704821
	Russula acrifolia	MN704839
	Russula persicina	MN704830
	Russula velenovskyi	MN704831
	Russula xerampelina	MN704833
	Russula delica	MN704836
	Russula sp 17	MN737469
	Russula sp 18	MN737757
	Russula sp 19	MN737758
	Russula sp 20	MN737759
	Russula sp 21	MN737470
	Russula sp 22	MN737471
	Russula sp 23	MN737760
	Russula sp 24	MN737761
